# Supplementary material for: Head and neck squamous cell carcinoma-derived extracellular vesicles mediate Ca²⁺-dependent platelet activation and aggregation through tissue factor
Source: Cell Commun Signal. 2025 May 1;23:210. doi: 10.1186/s12964-025-02215-x (PMC12044835; doi:10.1186/s12964-025-02215-x)
Supplement: Supplementary file 2 — Supplementary Material 2 [file 12964_2025_2215_MOESM2_ESM.xlsx]

## Sheet: Tabelle1
Table S2. All proteins identified in SAS EV proteomics.
Protein.Group	Protein.Names	Genes	n_fragments	n_peptides	log2 protein abundance SAS_06/12/23	log2 protein abundance SAS_13/12/23	log2 protein abundance SAS_14/12/23	log2 protein abundance SAS_19/12/23	log2 protein abundance SAS_ExoSpin	Valid values SAS (w/o ExoSpin)	Mean SAS (w/o ExoSpin)	Standard deviation SAS (w/o ExoSpin)	Coefficient of variance SAS (w/o ExoSpin)	Exosome marker
P02652	1433B_HUMAN	YWHAB	38	3	20.237	20.2777	20.5164	20.4059	21.0194	4	1349000	120056	0.0889961
P02790	1433E_HUMAN	YWHAE	98	9	21.2723	21.1831	21.3197	21.2916	22.0036	4	2524530	101820	0.0403321
P00738	1433F_HUMAN	YWHAH	59	7	19.8518	19.9209	20.0094	19.8692	20.2243	4	987981	49098.1	0.0496954
P02768	1433G_HUMAN	YWHAG	64	8	20.5175	20.5788	20.7775	20.6632	21.0261	4	1631280	128659	0.0788701
P02763	1433S_HUMAN	SFN	36	5	NaN	NaN	NaN	NaN	18.8667	0
P02760	1433T_HUMAN	YWHAQ	69	7	20.5329	20.5119	20.6785	20.5249	21.2335	4	1549830	86081.3	0.0555423
P19652	1433Z_HUMAN	YWHAZ	132	12	21.8465	21.8557	22.0229	21.8951	22.7572	4	3931850	226792	0.0576808
P05090	2A5G_HUMAN	PPP2R5C	6	1	NaN	NaN	NaN	NaN	18.8312	0
P04217	2AAA_HUMAN	PPP2R1A	114	13	20.0574	20.2684	20.3912	20.4329	20.5536	4	1286210	145201	0.112891
P43652	2ABA_HUMAN	PPP2R2A	25	3	18.4093	18.2831	19.1441	18.0351	19.2244	4	378770	137693	0.363528
P68871	3BP1_HUMAN;BGIN_HUMAN	BARGIN;SH3BP1	26	3	NaN	NaN	NaN	NaN	18.1985	0
P02765	4F2_HUMAN	SLC3A2	257	24	21.4001	20.9081	20.8364	19.7018	22.7503	4	1865030	785160	0.42099
F8WCM5;P01308	5NT3A_HUMAN	NT5C3A	7	1	NaN	NaN	17.1851	17.0964	17.4383	2	144577	6282.54	0.0434548
P02655	5NTC_HUMAN	NT5C2	9	1	NaN	NaN	NaN	NaN	17.2347	0
P20742	5NTD_HUMAN	NT5E	106	13	20.5203	20.0898	20.4331	19.1677	22.5269	4	1156140	412996	0.35722
P02766	6PGD_HUMAN	PGD	75	9	20.4234	20.6449	20.6914	20.6954	21.0508	4	1609250	137942	0.0857182
Q96PD5	6PGL_HUMAN	PGLS	29	4	20.6543	20.861	20.9164	21.0509	21.1647	4	1926580	216014	0.112123
P36955	A0A024R6I7_HUMAN;A0A0G2JRN3_HUMAN	SERPINA1	11	1	19.3174	19.3564	19.7119	18.8773	NaN	4	666192	154236	0.231518
P02647	A0A087WTE4_HUMAN;A0A087WTF6_HUMAN;A0A087WVD0_HUMAN;H7BYX6_HUMAN	NCAM1	10	1	NaN	NaN	NaN	NaN	20.363	0
P01023	A0A087WWU8_HUMAN	TPM3	31	4	NaN	NaN	NaN	NaN	19.0861	0
P69905	A0A0A0MTS5_HUMAN;A0A0A6YYF2_HUMAN	LAMA3	10	1	NaN	NaN	NaN	NaN	20.3509	0
P0DOY2;P0DOY3	A0A0B4J2B5_HUMAN;A0A4W8ZXM2_HUMAN;S4R460_HUMAN	IGHV3-72;IGHV3OR16-9	12	1	22.2936	22.0258	22.1072	22.0412	20.2515	4	4561100	401184	0.0879577
Q96KN2	A0A0G2JMB2_HUMAN	IGHA2	8	1	20.1287	19.7787	20.2146	20.1352	NaN	4	1103550	139779	0.126663
P02654	A0A140T9M0_HUMAN;A0A140T9U0_HUMAN;A0A140T9W2_HUMAN;Q53YP1_HUMAN	HLA-C	30	4	20.0517	19.9767	20.1583	19.9328	20.7483	4	1072410	74280.8	0.0692652
P00450	A0A140T9M5_HUMAN;A0A140T9Z4_HUMAN	HLA-C	8	1	22.7417	22.8661	23.032	23.1867	22.0152	4	8195720	1106430	0.135001
P30043	A0A2Q2TTZ9_HUMAN	IGKV1D-33	12	1	22.2607	22.2939	22.4862	22.2345	17.0572	4	5244160	429039	0.0818127
P01834	A0A2R8YDW8_HUMAN	SPG7	5	1	20.6541	NaN	NaN	20.9625	NaN	2	1846660	278081	0.150586
P05155	A0A3B3IRI8_HUMAN	AKR1C8P	8	1	21.2583	21.7092	21.9103	21.838	20.9192	4	3406860	635238	0.186458
B9A064	A0A3B3ITY6_HUMAN	CLSTN1	6	1	NaN	NaN	NaN	NaN	21.3725	0
Q6EMK4	A0A494C0G5_HUMAN	AGRN	21	2	21.6801	21.5825	21.4204	20.325	22.4499	4	2655170	922963	0.34761
B1AHL2	A16A1_HUMAN	ALDH16A1	13	2	19.4095	19.7305	19.663	19.8113	19.8986	4	829114	95811	0.115558
P13473	A1AG1_HUMAN	ORM1	153	11	27.7489	27.7973	27.5317	27.6428	13.1401	4	215603000	17442200	0.0808996
Q15493	A1AG2_HUMAN	ORM2	91	7	26.5367	26.5289	26.4449	26.4697	15.765	4	94616800	2935520	0.0310254
Q9NZP8	A1AT_HUMAN	SERPINA1	305	24	22.8087	22.8184	22.8508	22.7489	16.6266	4	7339130	214948	0.0292879
P04114	A1BG_HUMAN	A1BG	273	14	25.9081	25.9149	25.9279	25.9016	24.0803	4	63189000	492270	0.00779044
P04004	A2AP_HUMAN	SERPINF2	52	6	22.4074	22.4447	22.4916	22.4301	NaN	4	5704890	141504	0.024804
P05543	A2GL_HUMAN	LRG1	103	10	23.4553	23.6093	23.658	23.5837	22.8473	4	12526400	737008	0.0588366
P02749	A2MG_HUMAN	A2M	199	23	24.7993	24.6182	24.6829	24.8066	24.1324	4	27806600	1758640	0.0632452
Q9UNN8	A4_HUMAN	APP	160	14	20.4475	19.8392	20.2365	20.1555	21.8596	4	1192790	202954	0.170151
P04180	AAAT_HUMAN	SLC1A5	73	8	20.7974	20.2917	20.6037	19.6579	22.3824	4	1381650	430548	0.311619
O95445	AACT_HUMAN	SERPINA3	81	10	22.8586	22.7666	22.7915	22.7878	NaN	4	7310390	204031	0.0279097
P60709;P63261	AAK1_HUMAN;BMP2K_HUMAN	AAK1;BMP2K	6	1	NaN	NaN	NaN	NaN	17.6186	0
P02750	AASD1_HUMAN	AARSD1	8	1	NaN	NaN	NaN	NaN	18.6086	0
P02042	AATC_HUMAN	GOT1	73	10	21.7016	21.7311	21.7379	21.5938	17.1364	4	3388600	153752	0.0453733
P01619	ABCE1_HUMAN	ABCE1	31	5	19.9103	19.7396	19.3797	19.6224	19.8535	4	837510	126978	0.151614
P02656	ABCF2_HUMAN	ABCF2	19	2	NaN	17.9076	NaN	18.3057	18.2428	2	284945	55248.7	0.193892
P54108	ABHEB_HUMAN	ABHD14B	22	2	19.5491	19.4727	19.1254	19.0788	20.2468	4	655078	108010	0.164882
Q96IY4	ABI1_HUMAN	ABI1	6	1	NaN	NaN	NaN	NaN	18.6759	0
P01024	ACAP2_HUMAN	ACAP2	34	4	NaN	18.4848	NaN	NaN	18.8492	1	366836	NaN	NaN
P02774	ACE_HUMAN	ACE	137	15	20.783	20.8413	20.8565	20.7559	20.4331	4	1838070	60529.5	0.032931
P23142	ACES_HUMAN	ACHE	59	7	20.74	20.3079	20.2746	20.609	21.6565	4	1479270	235035	0.158886
P55058	ACL6A_HUMAN	ACTL6A	34	4	NaN	18.1129	NaN	NaN	18.8481	1	283492	NaN	NaN
P22792	ACLY_HUMAN	ACLY	224	29	19.6858	20.1154	19.9657	19.9838	20.6009	4	1010020	121853	0.120644
P22352	ACOC_HUMAN	ACO1	87	11	20.2186	20.8348	20.8292	20.7962	20.0484	4	1693580	316365	0.186802
E9PFZ2;H7C5R1	ACPH_HUMAN	APEH	28	3	19.7015	19.3869	19.7472	19.7577	19.8709	4	826153	94890.1	0.114858
P17066	ACSA_HUMAN	ACSS2	22	3	18.5747	19.1001	19.2756	18.9267	19.2763	4	521339	103534	0.198592
Q6UXB8	ACTA_HUMAN	ACTA2	57	5	19.744	19.9572	20.2199	20.0002	20.5965	4	1041490	140968	0.135352
Q8TCC7	ACTB_HUMAN;ACTG_HUMAN	ACTB;ACTG1	340	24	23.6734	23.6137	23.7647	23.7264	24.9703	4	13586400	615196	0.0452802
P35858	ACTN1_HUMAN	ACTN1	372	39	20.3762	20.0625	20.1197	20.3121	21.2077	4	1224260	127325	0.104002
Q7Z7G0	ACTN4_HUMAN	ACTN4	181	18	19.9637	19.6091	19.6472	19.7584	20.1978	4	882543	100408	0.113772
P00488	ACTY_HUMAN	ACTR1B	7	1	NaN	NaN	NaN	NaN	17.6707	0
Q9UGM5	ACTZ_HUMAN	ACTR1A	41	5	19.2265	19.3118	19.0703	19.1635	20.3935	4	600477	42323.7	0.0704836
Q01459	ACY1_HUMAN	ACY1	31	4	20.5711	20.4824	20.5592	20.4592	NaN	4	1502330	57718.6	0.0384194
O75882	ADA_HUMAN	ADA	3	1	17.1433	17.6931	NaN	NaN	18.0383	2	178337	47487.1	0.266277
Q16772	ADA10_HUMAN	ADAM10	132	15	20.1536	20.0097	20.0555	19.5582	20.8213	4	1020930	172306	0.168774
P01615	ADA15_HUMAN	ADAM15	44	6	19.0567	19.154	19.4682	19.2514	18.0959	4	619508	77524.1	0.125138
P04278	ADA17_HUMAN	ADAM17	19	2	NaN	19.9721	20.1831	19.8673	20.0229	3	1058450	119844	0.113225
P01344	ADAM9_HUMAN	ADAM9	16	2	NaN	NaN	NaN	NaN	17.6072	0
P01859	ADH1G_HUMAN	ADH1C	17	2	19.8799	20.0735	20.0956	19.9901	19.4849	4	1057500	70510	0.0666761
P18827	ADHX_HUMAN	ADH5	36	5	21.3044	21.3743	21.5558	21.5352	21.0907	4	2857480	241373	0.0844707
A0A140T9M5;A0A140T9Z4	ADK_HUMAN	ADK	94	10	20.3529	20.59	20.616	20.7826	20.3774	4	1582100	190437	0.12037
P27487	ADPPT_HUMAN	AASDHPPT	12	2	NaN	NaN	NaN	NaN	18.576	0
P11279	ADRB2_HUMAN	ADRB2	8	1	17.5462	NaN	NaN	NaN	20.3684	1	191397	NaN	NaN
P43251	ADRM1_HUMAN	ADRM1	7	1	19.2266	18.7975	18.7584	18.0424	19.6981	4	445618	140399	0.315065
O60762	ADSV_HUMAN	SCIN	18	2	NaN	NaN	19.6261	19.5863	18.7274	2	798149	15562.1	0.0194978
P02751	AEBP1_HUMAN	AEBP1	44	5	19.7245	19.8817	19.9511	19.6801	20.0659	4	921496	81973.5	0.088957
Q9H082	AFAD_HUMAN	AFDN	14	2	NaN	NaN	18.8658	NaN	18.5963	1	477715	NaN	NaN
Q9HDC9	AFAM_HUMAN	AFM	594	40	25.9001	25.9144	25.9124	25.9038	20.4776	4	62949900	297444	0.00472509
P16930	AGAL_HUMAN	GLA	53	5	18.7764	18.9853	19.1507	NaN	19.8743	3	516671	66531.2	0.128769
P41222	AGM1_HUMAN	PGM3	21	3	19.2621	19.553	19.4848	19.627	19.9049	4	735336	77546.5	0.105457
P14151	AGRE5_HUMAN	ADGRE5	28	2	19.9479	20.1522	19.979	20.1306	19.9345	4	1089500	78308.1	0.0718755
P43121	AGRF5_HUMAN	ADGRF5	24	3	19.2695	19.226	19.2691	19.0851	NaN	4	608285	35866.9	0.058964
P01009	AGRG1_HUMAN	ADGRG1	6	1	NaN	NaN	NaN	NaN	18.8797	0
P01011	AGRG6_HUMAN	ADGRG6	40	5	20.3865	20.3526	20.3631	20.4525	19.8385	4	1373290	43147.3	0.031419
P02753	AGRIN_HUMAN	AGRN	618	58	21.727	21.4398	21.4442	20.4579	22.6732	4	2652340	859630	0.324103
P06276	AHNK_HUMAN	AHNAK	39	5	NaN	NaN	NaN	18.0009	19.9361	1	262303	NaN	NaN
P00751	AHSA1_HUMAN	AHSA1	16	3	18.2443	18.8336	18.6085	18.4774	20.3967	4	385583	65609.6	0.170157
Q8NBM4	AIDA_HUMAN	AIDA	8	1	NaN	NaN	NaN	NaN	19.6162	0
P68366	AIMP1_HUMAN	AIMP1	6	1	NaN	NaN	NaN	NaN	19.7838	0
Q92820	AIMP2_HUMAN	AIMP2	12	2	18.2188	19.0227	NaN	NaN	20.1309	2	418843	160891	0.384132
P15169	AJUBA_HUMAN	AJUBA	7	1	NaN	NaN	NaN	NaN	17.3778	0
P01876	AK1A1_HUMAN	AKR1A1	53	6	21.3072	21.7026	21.7312	21.7315	21.373	4	3242830	433204	0.133588
Q9Y646	AK1BA_HUMAN	AKR1B10	17	2	21.6953	22.2504	22.2727	22.2976	21.7694	4	4651750	840072	0.180593
P01042	AK1C1_HUMAN;AK1C2_HUMAN;AK1C3_HUMAN;AK1C4_HUMAN	AKR1C1;AKR1C2;AKR1C3;AKR1C4	15	2	21.1129	21.9411	21.9014	21.7207	21.5974	4	3416900	804904	0.235565
Q53H76	AK1D1_HUMAN	AKR1D1	15	2	NaN	20.009	NaN	NaN	20	1	1055130	NaN	NaN
P12955	AKT2_HUMAN	AKT2	13	2	NaN	NaN	NaN	NaN	17.0776	0
Q9BUD6	AL1A1_HUMAN	ALDH1A1	60	8	20.4606	20.7819	20.7806	20.8525	20.5123	4	1735160	199476	0.114961
P59665;P59666	AL1A3_HUMAN	ALDH1A3	7	1	NaN	18.6997	18.4846	18.7206	18.3867	3	408178	35985	0.0881603
P08571	AL1L1_HUMAN	ALDH1L1	85	10	19.9253	20.6524	20.6167	20.5915	20.0167	4	1457900	309437	0.212249
Q9UNP9	AL1L2_HUMAN	ALDH1L2	10	1	NaN	21.0698	NaN	20.9823	20.2067	2	2136330	91539	0.0428486
P00742	AL7A1_HUMAN	ALDH7A1	32	4	18.7573	19.2255	19.1017	19.2646	19.3238	4	562129	84332.4	0.150023
O43286	AL8A1_HUMAN	ALDH8A1	27	3	19.4842	20.3984	20.1972	20.1828	19.686	4	1126940	276671	0.245505
P61769	AL9A1_HUMAN	ALDH9A1	56	6	21.2439	21.4417	21.538	21.5581	21.1501	4	2866120	275571	0.0961479
P18564	ALBU_HUMAN	ALB	988	54	28.4757	27.8152	27.9783	28.4953	16.98	4	313061000	73422800	0.234532
Q13093	ALDOA_HUMAN	ALDOA	171	16	20.6135	20.4571	20.6291	20.5258	21.0738	4	1543780	85179.2	0.0551756
P00915	ALDOB_HUMAN	ALDOB	52	5	21.0177	20.9582	21.0409	21.1928	21.6868	4	2178680	154039	0.0707028
Q96L12	ALDOC_HUMAN	ALDOC	42	5	20.757	20.7337	20.7646	20.7188	21.2081	4	1755730	25616.2	0.01459
P04264	ALDR_HUMAN	AKR1B1	31	4	19.9726	20.4716	20.8155	20.4267	20.5268	4	1434420	333853	0.232744
P16112	ALS_HUMAN	IGFALS	30	2	22.6792	23.2953	23.2633	23.1957	23.2757	4	9171270	1661520	0.181166
P68104;Q5VTE0	AMBP_HUMAN	AMBP	138	11	26.8546	26.932	26.8031	26.7927	20.0725	4	120684000	5387170	0.0446386
P0CG47;P0CG48;P62979;P62987	AMGO2_HUMAN	AMIGO2	31	4	18.2487	18.8082	17.9031	NaN	20.0702	3	338528	109498	0.323453
P54802	AMPB_HUMAN	RNPEP	26	3	19.9352	NaN	19.8974	20.1727	19.517	3	1053670	111825	0.106129
P08697	AMPD2_HUMAN	AMPD2	41	5	19.6365	19.8168	19.7824	19.8863	20.4003	4	902363	64612.4	0.0716035
Q6UX71	AMPE_HUMAN	ENPEP	24	3	20.5637	20.7815	20.3357	20.6485	19.0323	4	1579830	200297	0.126784
P07333	AMPH_HUMAN;BIN1_HUMAN;BIN2_HUMAN	AMPH;BIN1;BIN2	9	1	NaN	18.8797	19.3715	18.8868	19.1982	3	548452	112451	0.205034
P04908;P0C0S8;P20671;Q16777;Q6FI13;Q7L7L0;Q93077;Q96KK5;Q99878;Q9BTM1	AMPL_HUMAN	LAP3	44	5	20.7142	20.0378	19.8709	20.2093	19.2992	4	1241940	335283	0.269967
P00740	AMPN_HUMAN	ANPEP	53	7	20.4035	20.3341	20.3442	20.3197	18.2041	4	1337170	34477.1	0.0257835
P20774	AMRP_HUMAN	LRPAP1	34	4	NaN	NaN	NaN	NaN	19.4197	0
P07358	AN30A_HUMAN	ANKRD30A	8	1	NaN	21.9652	NaN	NaN	NaN	1	4094370	NaN	NaN
O95497	ANAG_HUMAN	NAGLU	219	21	22.3514	22.5312	22.527	22.3588	19.5444	4	5708720	397269	0.0695898
P06733	ANFY1_HUMAN	ANKFY1	20	3	18.4558	19.725	18.3034	19.5073	19.3041	4	573717	273057	0.475944
P07737	ANGL2_HUMAN	ANGPTL2	49	6	19.1907	19.6154	19.6712	19.5422	20.2391	4	749980	105204	0.140275
Q06828	ANGL3_HUMAN	ANGPTL3	61	7	21.5728	21.626	21.5847	21.5784	21.8877	4	3158140	53243.9	0.0168593
P08603	ANGT_HUMAN	AGT	67	8	21.1781	21.0618	21.0012	21.0973	21.6127	4	2225990	114509	0.0514417
A0A2Q2TTZ9	ANM1_HUMAN	PRMT1	40	5	19.8499	NaN	19.0743	NaN	19.6315	2	748482	277852	0.37122
Q96DR8	ANPRC_HUMAN	NPR3	6	1	NaN	NaN	NaN	NaN	17.3892	0
P17812	ANT3_HUMAN	SERPINC1	48	7	20.504	20.3687	20.1271	20.379	17.5852	4	1337430	141774	0.106005
P07996	ANTR1_HUMAN	ANTXR1	58	7	19.0194	19.2051	19.1678	19.1839	18.9348	4	580073	33058.1	0.0569896
A0A075B6H7;A0A0C4DH55;P01624	ANTR2_HUMAN	ANTXR2	14	2	19.8869	20.1666	19.811	19.8318	19.9251	4	999865	119924	0.119941
P61204;P84077	ANX11_HUMAN	ANXA11	37	5	19.4967	19.3657	18.9655	NaN	20.0457	3	642405	117496	0.182899
P12109	ANXA1_HUMAN	ANXA1	77	8	19.3329	18.9642	18.8474	NaN	20.9047	3	547832	99480.2	0.181589
P31431	ANXA2_HUMAN	ANXA2	151	16	20.2597	19.7739	20.0438	19.0213	22.0816	4	941219	309646	0.328984
P02787	ANXA3_HUMAN	ANXA3	11	2	19.6575	20.1424	19.9176	19.4024	20.1293	4	916915	201208	0.219441
P26022	ANXA4_HUMAN	ANXA4	9	1	NaN	NaN	NaN	NaN	15.8962	0
P48740	ANXA5_HUMAN	ANXA5	64	8	19.6088	19.9141	19.9838	19.4244	20.0796	4	881992	156880	0.17787
O60218	ANXA7_HUMAN	ANXA7	42	5	19.4512	19.257	19.266	19.1447	19.7933	4	638340	57178.9	0.0895745
P25311	ANXA8_HUMAN;AXA81_HUMAN	ANXA8;ANXA8L1	14	2	NaN	NaN	NaN	NaN	18.2657	0
P78417	AOC1_HUMAN	AOC1	26	3	20.3484	20.5111	19.6126	19.7495	18.5805	4	1128090	338799	0.300329
P01591	AOC3_HUMAN	AOC3	125	12	22.0508	22.0783	22.0697	22.0483	20.6056	4	4378020	44252.1	0.0101078
A0A0B4J2B5;A0A4W8ZXM2;S4R460	AP1B1_HUMAN	AP1B1	21	3	18.7374	19.0926	NaN	NaN	19.2965	2	498028	86262.8	0.173209
Q8TD08	AP1G1_HUMAN	AP1G1	64	7	18.991	18.8986	19.0215	18.839	19.7792	4	502702	29096.7	0.0578806
Q9Y5Y7	AP1M2_HUMAN	AP1M2	11	2	NaN	NaN	18.9182	NaN	20.0423	1	495391	NaN	NaN
P07339	AP1S1_HUMAN	AP1S1	23	3	18.7885	18.933	19.2587	19.0895	19.38	4	534590	75227.2	0.140719
P01266	AP2A1_HUMAN	AP2A1	8	1	19.3601	NaN	19.6974	19.3467	19.6912	3	729937	104152	0.142686
P00739	AP2A2_HUMAN	AP2A2	12	2	19.0667	19.8226	19.6443	19.5689	20.2732	4	768382	159193	0.20718
A6NMZ7	AP2B1_HUMAN	AP2B1	106	13	19.0936	19.4659	19.6336	19.0902	20.0317	4	663765	126598	0.190727
Q16853	AP2M1_HUMAN	AP2M1	6	1	NaN	NaN	NaN	NaN	18.3258	0
Q71U36	AP3B1_HUMAN	AP3B1	16	2	NaN	19.3514	NaN	NaN	19.577	1	668905	NaN	NaN
P49747	APEX1_HUMAN	APEX1	27	3	NaN	NaN	NaN	NaN	18.9942	0
P51570	APLP2_HUMAN	APLP2	72	8	20.0102	19.9039	19.7445	20.1127	19.3567	4	1012300	108912	0.107589
O75828	APMAP_HUMAN	APMAP	22	3	22.8706	22.9084	22.8728	22.8626	21.4629	4	7712220	109465	0.0141937
Q92954	APOA1_HUMAN	APOA1	224	17	24.6673	24.7858	24.8576	24.6831	18.9967	4	28226700	1768960	0.0626696
P31146	APOA2_HUMAN	APOA2	154	9	29.654	29.6588	29.8135	29.7797	14.6309	4	889402000	50679200	0.0569812
Q8NA47	APOB_HUMAN	APOB	267	26	23.9899	23.9416	23.8989	23.948	22.4616	4	16149400	416688	0.0258022
P45877	APOC1_HUMAN	APOC1	48	4	24.4773	24.5314	24.6601	24.5154	NaN	4	24524600	1376540	0.0561291
P68371	APOC2_HUMAN	APOC2	57	5	25.604	25.6519	25.6911	25.5805	19.8055	4	52017300	1786380	0.0343421
P61224	APOC3_HUMAN	APOC3	48	5	23.4346	23.4602	23.3398	23.5295	21.1735	4	11400600	616353	0.0540633
P51884	APOD_HUMAN	APOD	76	8	26.4536	26.3283	26.4685	26.4384	15.7275	4	89988500	3902010	0.0433612
Q9BXX3	APOH_HUMAN	APOH	166	13	23.7899	23.818	23.9085	23.8383	22.622	4	15009100	531924	0.0354401
P06396	APOM_HUMAN	APOM	84	8	23.832	23.789	23.7557	23.7787	22.1304	4	14495800	322473	0.022246
P00966	APT_HUMAN	APRT	48	6	20.4444	20.4359	20.3666	20.3498	20.6124	4	1383390	45910.9	0.0331874
P63104	ARC1A_HUMAN	ARPC1A	16	2	20.2975	NaN	NaN	19.8484	19.8362	2	1116360	243798	0.218386
P10915	ARC1B_HUMAN	ARPC1B	24	3	19.7696	19.6823	19.8641	19.694	19.9102	4	884396	52091.8	0.0589009
Q99983	ARCH_HUMAN	ZBTB8OS	9	1	19.2165	19.2439	19.034	18.9028	19.317	4	564233	61837.9	0.109596
P81605	ARF1_HUMAN;ARF3_HUMAN	ARF1;ARF3	47	6	21.9961	22.3556	22.2235	22.2504	22.5296	4	4859060	494427	0.101754
P19320	ARF4_HUMAN	ARF4	35	5	21.6187	21.9788	21.9434	21.8587	21.9775	4	3797310	408802	0.107656
O75144	ARF5_HUMAN	ARF5	15	2	20.1439	20.5578	20.3115	20.7566	20.0456	4	1443710	270208	0.187162
P37802	ARF6_HUMAN	ARF6	21	3	20.4387	20.7081	20.7697	20.4132	21.0155	4	1579560	199834	0.126512
P13645	ARGI1_HUMAN	ARG1	24	4	19.5431	19.2953	19.6192	19.8839	19.2615	4	795027	133927	0.168456
P18085	ARHG7_HUMAN	ARHGEF7	6	1	NaN	NaN	NaN	NaN	16.9136	0
Q96RS6	ARK72_HUMAN	AKR7A2	23	2	19.3254	19.7778	19.8595	20.1048	20.117	4	908675	194239	0.21376
P08263;P09210	ARL1_HUMAN	ARL1	11	1	20.8332	20.4314	20.6652	20.911	18.8348	4	1729180	246181	0.142369
P35527	ARL3_HUMAN	ARL3	19	2	19.1338	19.233	19.1598	19.2372	19.7261	4	598779	21588.8	0.0360547
P01857	ARLY_HUMAN	ASL	97	9	20.4308	20.925	21.0165	21.0293	20.3625	4	1916450	341817	0.17836
P23526	ARM10_HUMAN	ARMC10	8	1	NaN	NaN	NaN	NaN	16.0198	0
P35443	ARMC8_HUMAN	ARMC8	8	1	18.8901	NaN	NaN	19.2818	18.8212	2	561603	107163	0.190817
Q9UGM3	ARP2_HUMAN	ACTR2	80	9	20.1537	20.0618	20.1878	20.0139	19.9603	4	1128500	62741.1	0.0555969
O43895	ARP3_HUMAN	ACTR3	105	13	20.0313	20.1717	20.2205	20.2223	20.3964	4	1174420	71266.4	0.0606823
P42285	ARP5L_HUMAN	ARPC5L	8	1	20.2386	20.1295	20.2192	20.2589	20.885	4	1214880	47292.4	0.0389275
P00918	ARPC2_HUMAN	ARPC2	77	10	20.0967	20.0517	20.1995	20.0716	20.1144	4	1128540	52317.4	0.0463586
P07195	ARPC3_HUMAN	ARPC3	21	3	20.3828	20.2559	20.4087	20.4608	20.6981	4	1363600	80792.4	0.0592491
P12830	ARPC4_HUMAN	ARPC4	32	4	21.4833	21.2834	21.4243	21.4359	21.2673	4	2783770	162500	0.058374
P00558	ARPC5_HUMAN	ARPC5	13	2	20.0099	NaN	20.1404	NaN	20.8932	2	1105760	70687.1	0.0639261
P01033	ARRB1_HUMAN	ARRB1	36	4	19.4761	19.5899	19.349	19.6692	19.6537	4	754992	72185.9	0.0956114
P04275	ARRD1_HUMAN	ARRDC1	43	5	19.7224	19.743	19.6319	19.5266	21.058	4	827563	55840.2	0.0674755
P14543	ARSA_HUMAN	ARSA	23	3	19.8824	19.9685	20.0167	19.8582	NaN	4	1000920	51470	0.0514228
P04406	ARSG_HUMAN	ARSG	9	1	21.074	21.1777	21.3118	21.535	21.225	4	2555310	360707	0.14116
Q9NPH3	ARY1_HUMAN	NAT1	19	2	18.9549	19.6957	19.5408	19.5763	19.7687	4	725448	149539	0.206133
Q76LX8	ASAH2_HUMAN	ASAH2	26	3	19.8847	20.007	20.0267	19.9978	NaN	4	1034220	44985.6	0.0434973
P17516;P42330;P52895;Q04828	ASAP2_HUMAN	ASAP2	6	1	NaN	NaN	17.7822	18.5534	19.4668	2	305059	112629	0.369203
A0A3B3IRI8	ASM_HUMAN	SMPD1	37	4	21.1064	21.2175	21.4132	21.4057	21.384	4	2566710	263120	0.102513
P30086	ASM3A_HUMAN	SMPDL3A	46	7	20.5112	20.5848	20.6853	20.4787	NaN	4	1553640	99973.7	0.0643481
O43505	ASNS_HUMAN	ASNS	6	1	19.337	19.7521	19.5746	19.4502	19.9827	4	760584	94928.7	0.12481
P17174	ASPG_HUMAN	AGA	17	2	19.078	19.1119	19.2944	19.0975	NaN	4	580978	41675.7	0.0717337
H3BR70;H3BTN5	ASPN_HUMAN	ASPN	25	2	20.1885	19.967	20.2749	20.3035	19.7609	4	1195650	121387	0.101524
P14618	ASSY_HUMAN	ASS1	63	9	21.7412	21.9126	22.0379	22	21.8061	4	3988390	355055	0.0890221
Q9NR31;Q9Y6B6	AT1A1_HUMAN	ATP1A1	209	25	20.139	19.8835	20.036	18.9535	20.7916	4	926149	289377	0.312452
Q13361	AT1B1_HUMAN	ATP1B1	16	2	18.7337	19.418	NaN	NaN	19.8796	2	568207	187076	0.329239
P30039	AT1B3_HUMAN	ATP1B3	34	4	20.4633	20.2457	20.2882	19.4912	21.3841	4	1176570	306003	0.260079
P62851	AT2B4_HUMAN	ATP2B4	29	4	NaN	NaN	NaN	NaN	18.1556	0
P00338	ATF6A_HUMAN	ATF6	8	1	18.8273	NaN	NaN	19.2008	18.8009	2	533846	97180.6	0.182039
Q7Z4W1	ATF6B_HUMAN	ATF6B	9	1	NaN	18.8047	NaN	NaN	18.2919	1	457923	NaN	NaN
Q08380	ATG3_HUMAN	ATG3	6	1	NaN	19.2176	18.6037	18.7005	19.0867	3	477999	114833	0.240236
P14550	ATL2_HUMAN	ADAMTSL2	54	6	18.6324	18.8269	18.9949	18.9852	19.928	4	478185	54620.2	0.114224
P11150	ATL4_HUMAN	ADAMTSL4	41	5	19.296	19.1722	19.4816	NaN	19.4218	3	655511	71383.4	0.108897
P35542	ATPB_HUMAN	ATP5F1B	43	4	19.1904	19.5115	19.385	19.5006	19.3755	4	693011	69229.6	0.0998968
Q04756	ATRN_HUMAN	ATRN	390	30	23.1806	22.995	23.1099	23.0575	17.5975	4	8912300	487311	0.0546785
P11142	ATS1_HUMAN	ADAMTS1	69	9	NaN	NaN	NaN	NaN	18.3705	0
Q96S96	ATS13_HUMAN	ADAMTS13	63	6	21.5689	21.7005	21.6979	21.8574	22.2866	4	3430050	282564	0.0823788
P11717	ATX10_HUMAN	ATXN10	9	1	NaN	NaN	17.8259	NaN	18.0931	1	232348	NaN	NaN
Q9Y5C1	B1AHL2_HUMAN	FBLN1	12	1	24.0285	23.9873	24.17	24.1771	24.1846	4	17896500	1200980	0.0671069
P63000	B1ALD9_HUMAN	POSTN	34	3	19.9707	19.8278	19.9974	20.1548	21.0533	4	1043010	97194.6	0.0931863
P62937	B2L13_HUMAN	BCL2L13	8	1	NaN	NaN	NaN	NaN	17.0411	0
Q96EE4	B2MG_HUMAN	B2M	44	2	22.5084	22.6679	22.6706	22.5475	17.0537	4	6359150	365263	0.0574389
P04066	B3GN2_HUMAN	B3GNT2	9	2	19.1158	19.4049	19.1961	18.9119	20.0123	4	589023	83262.8	0.141357
Q10588	B3GN5_HUMAN	B3GNT5	6	1	NaN	NaN	NaN	NaN	18.5469	0
P02795;P04732;P13640;P80297;Q8N339	B3GT6_HUMAN	B3GALT6	10	1	NaN	NaN	NaN	NaN	17.1467	0
Q8NEM7	B4GA1_HUMAN	B4GAT1	77	8	21.4388	21.7151	21.8237	21.7739	21.4065	4	3395770	384821	0.113324
P40692	B4GN1_HUMAN	B4GALNT1	18	2	NaN	NaN	19.133	NaN	19.5894	1	574922	NaN	NaN
P35908	B4GT1_HUMAN	B4GALT1	33	4	20.4514	20.5612	20.6672	20.6007	20.431	4	1559050	96673.1	0.0620077
P80108	B4GT2_HUMAN	B4GALT2	6	1	NaN	NaN	NaN	NaN	16.7924	0
Q9Y617	B4GT5_HUMAN	B4GALT5	14	2	22.5456	22.7708	22.5512	22.5637	22.2051	4	6405980	501295	0.0782543
P13611	B7Z596_HUMAN;F5H7S3_HUMAN;H7BYY1_HUMAN	TPM1	6	1	NaN	NaN	NaN	NaN	18.2158	0
P01877	B7Z9C2_HUMAN;F8VRJ2_HUMAN;F8VV59_HUMAN;F8W118_HUMAN	NAP1L1	6	1	18.1054	18.7867	18.8951	18.7589	19.8251	4	416340	91545	0.219881
P28072	BACH_HUMAN	ACOT7	50	6	19.3921	19.3856	19.4365	19.6267	20.3484	4	723002	58718.2	0.0812145
P08185	BAF_HUMAN	BANF1	12	2	19.1059	19.1565	19.507	18.874	20.4709	4	593528	110601	0.186344
Q92616	BAIP2_HUMAN	BAIAP2	24	3	18.6237	19.0977	NaN	NaN	21.5844	2	482457	111087	0.230252
P39059	BASI_HUMAN	BSG	79	7	20.1965	19.8982	20.2428	19.0903	21.9759	4	994422	313177	0.314933
Q9Y6Z7	BASP1_HUMAN	BASP1	90	9	20.5101	19.9674	20.1605	18.7846	22.037	4	1035500	435609	0.420677
P63027;Q15836	BAX_HUMAN	BAX	6	1	18.2875	19.4321	19.1041	19.4627	18.7912	4	578337	186564	0.322587
P0DMV8;P0DMV9	BCAM_HUMAN	BCAM	59	9	19.6065	19.8663	19.9545	19.8238	21.7293	4	924507	91815.6	0.0993131
P49189	BGAL_HUMAN	GLB1	66	7	19.5191	19.7345	19.7569	19.3204	20.4264	4	791067	109221	0.138068
P11766	BGH3_HUMAN	TGFBI	392	26	21.3704	21.2961	21.227	20.5576	22.0088	4	2320960	528888	0.227875
P05452	BHMT1_HUMAN	BHMT	60	6	21.4767	20.7108	20.9575	21.0864	20.3098	4	2224320	508324	0.22853
P00736	BI2L1_HUMAN	BAIAP2L1	5	1	NaN	NaN	NaN	NaN	16.9116	0
P07900	BIEA_HUMAN	BLVRA	26	3	20.9991	21.0845	21.1205	21.1577	21.3596	4	2234670	103956	0.0465196
P59998	BIP_HUMAN	HSPA5	373	28	20.1733	20.5412	20.5642	20.4408	23.1267	4	1420480	168011	0.118278
Q12805	BLMH_HUMAN	BLMH	16	2	18.552	19.3031	19.393	19.485	20.2042	4	613348	156742	0.255552
O14498	BLVRB_HUMAN	BLVRB	12	1	23.9759	24.5489	24.5233	24.5983	23.611	4	22639000	4128020	0.182341
Q7RTV2	BMP1_HUMAN	BMP1	94	12	19.3718	19.6133	19.4681	19.7061	20.3474	4	765248	78763.2	0.102925
P23470	BMPER_HUMAN	BMPER	6	1	NaN	NaN	NaN	NaN	17.0233	0
P00746	BOLA2_HUMAN	BOLA2	8	1	NaN	NaN	NaN	NaN	16.8061	0
Q15102	BPNT1_HUMAN	BPNT1	17	2	18.9103	18.5389	17.9848	18.8463	19.7186	4	401062	106157	0.26469
P33908	BRK1_HUMAN	BRK1	15	2	NaN	NaN	NaN	NaN	17.8757	0
Q12913	BROX_HUMAN	BROX	39	5	18.7754	19.9128	19.6827	NaN	22.1154	3	759096	278484	0.366863
A0A494C0G5	BST1_HUMAN	BST1	44	5	21.5252	21.5974	21.5761	21.5361	NaN	4	3089640	72529.6	0.0234751
O00468	BTD_HUMAN	BTD	114	11	22.9987	22.849	22.8441	22.899	17.222	4	7821740	395389	0.0505501
P49888	BUB3_HUMAN	BUB3	29	3	NaN	NaN	NaN	NaN	18.5993	0
P13591	BYST_HUMAN	BYSL	18	2	NaN	NaN	NaN	NaN	17.4553	0
Q9NRN5	BZW1_HUMAN	BZW1	19	3	20.0108	19.9679	19.428	19.4822	20.1004	4	879916	186724	0.212207
P15151	BZW2_HUMAN	BZW2	6	1	18.6183	19.1924	18.2595	19.1532	19.96	4	474582	139425	0.293784
Q13103	C1QBP_HUMAN	C1QBP	6	1	NaN	NaN	NaN	NaN	17.8874	0
P13929	C1QT3_HUMAN	C1QTNF3	30	3	20.6788	20.4666	20.9454	20.8236	21.3122	4	1750640	244526	0.139678
O00142	C1R_HUMAN	C1R	21	3	21.4494	21.2458	21.5184	21.5054	20.9975	4	2832810	238611	0.0842312
O00391	C1RL_HUMAN	C1RL	170	12	23.9381	23.9876	24.0011	23.9154	NaN	4	16329500	457370	0.0280088
Q9Y2L5	C1TC_HUMAN	MTHFD1	77	11	19.5931	19.8501	19.8969	19.9983	19.8995	4	939894	108163	0.11508
A0A075B6I9;P04211	C9J0J7_HUMAN;G5E9Q6_HUMAN	PFN2	6	1	19.5264	19.3324	19.1112	19.0382	20.3923	4	629985	98384.9	0.15617
P17405	CA2D1_HUMAN	CACNA2D1	201	21	20.3732	20.2304	20.2882	20.2713	20.6392	4	1283560	54009.4	0.0420778
Q01650	CAB39_HUMAN	CAB39	55	8	19.3731	19.3441	19.4518	18.9945	21.1085	4	645973	85287.1	0.132029
Q03692	CAD11_HUMAN	CDH11	96	10	19.3044	19.559	19.8531	19.7612	21.4991	4	813875	132598	0.162922
Q96EG1	CAD13_HUMAN	CDH13	44	5	21.0134	21.1555	21.1925	21.1465	19.9249	4	2292570	121694	0.0530817
P20618	CAD15_HUMAN	CDH15	17	2	19.0442	NaN	19.1638	19.5621	20.4646	3	633994	123559	0.194889
Q9Y490	CAD19_HUMAN	CDH19	12	2	18.498	NaN	18.1013	18.4792	19.9285	3	338951	50064.9	0.147706
P62805	CADH1_HUMAN	CDH1	112	13	21.7158	21.7722	21.7479	21.7177	18.405	4	3499210	65411.1	0.0186931
P62258	CADH2_HUMAN	CDH2	46	6	19.2319	18.6968	18.8988	19.2414	19.6614	4	537300	96508.9	0.179618
P30711	CADH3_HUMAN	CDH3	22	3	20.5005	19.9249	NaN	NaN	19.7251	2	1239390	345111	0.278452
Q9HBB8	CADH5_HUMAN	CDH5	9	1	NaN	NaN	NaN	NaN	21.5859	0
P10768	CADH6_HUMAN	CDH6	64	8	19.6181	19.2085	19.2285	20.0727	22.4294	4	781872	232788	0.297731
P62854	CADM1_HUMAN	CADM1	20	3	20.3934	19.6344	19.6175	20.3544	19.9016	4	1084000	317796	0.293171
Q14515	CAH1_HUMAN	CA1	85	7	22.5629	22.5302	22.6513	22.486	NaN	4	6178780	302635	0.0489798
Q9Y240	CAH11_HUMAN	CA11	7	1	NaN	NaN	NaN	NaN	15.9729	0
Q96S86	CAH2_HUMAN	CA2	64	8	21.715	21.6607	21.8716	21.7472	NaN	4	3528700	222224	0.0629764
O60888	CAH3_HUMAN	CA3	26	3	20.5354	20.46	20.4749	20.3685	21.0125	4	1443290	68485.6	0.0474509
P62491;Q15907	CALD1_HUMAN	CALD1	20	3	18.9218	19.5329	19.4753	19.4718	20.8146	4	677786	121625	0.179445
Q9NTU7	CALM1_HUMAN;CALM2_HUMAN;CALM3_HUMAN	CALM1;CALM2;CALM3	96	9	20.0296	19.9349	20.1323	19.7173	21.108	4	1020970	121803	0.119301
P03952	CALR_HUMAN	CALR	88	8	20.1311	20.24	20.289	20.2757	20.8895	4	1234290	60099.9	0.0486917
Q9UBR2	CALR3_HUMAN	CALR3	5	1	22.4074	22.4697	22.6968	22.613	22.9371	4	6146080	563423	0.0916719
P08865	CALU_HUMAN	CALU	24	4	NaN	NaN	NaN	NaN	18.1391	0
P06732	CAMP_HUMAN	CAMP	5	1	17.1492	17.5118	NaN	NaN	NaN	2	166123	29367.1	0.176779
Q9NPR2	CAN1_HUMAN	CAPN1	62	8	19.4578	19.2515	19.265	19.2331	20.439	4	647611	48629.4	0.0750904
P05451;P48304	CAN2_HUMAN	CAPN2	56	8	20.5582	20.484	20.7926	20.7091	21.4653	4	1635250	158954	0.097205
O75874	CAN7_HUMAN	CAPN7	53	6	19.416	19.7383	19.643	19.7983	20.8536	4	826180	92683	0.112183
P04179	CAND1_HUMAN	CAND1	231	26	19.699	20.0508	20.0305	20.0024	20.1045	4	1014630	109975	0.108389
Q14019	CAP1_HUMAN	CAP1	124	12	20.0581	20.49	20.5453	20.5051	21.2637	4	1395660	204124	0.146256
P16070	CAP2_HUMAN	CAP2	8	1	20.4235	20.8312	21.0041	20.9643	21.6397	4	1855230	315936	0.170294
P36871	CAPZB_HUMAN	CAPZB	69	7	19.9873	20.0731	20.0944	20.1607	20.6671	4	1108510	54693.1	0.0493393
Q13418	CARM1_HUMAN	CARM1	19	2	NaN	NaN	NaN	NaN	18.1113	0
Q9BWD1	CASP3_HUMAN	CASP3	7	1	NaN	17.5015	NaN	NaN	19.4747	1	185558	NaN	NaN
P31025	CASP6_HUMAN	CASP6	15	2	19.1942	19.6871	19.4807	19.6593	19.558	4	750900	112313	0.149572
Q8IWT6	CATA_HUMAN	CAT	44	5	19.7171	19.766	19.9395	19.9476	20.7275	4	942523	76966.7	0.0816603
P08708	CATB_HUMAN	CTSB	98	9	19.9604	19.6712	19.5975	19.6158	21.0256	4	862954	106327	0.123213
Q15582	CATC_HUMAN	CTSC	93	9	19.6155	19.2283	19.2926	19.2817	20.7278	4	674233	86871.2	0.128844
Q99650	CATD_HUMAN	CTSD	124	14	22.0568	22.1534	22.1345	21.9815	20.5654	4	4443120	240030	0.0540228
Q9UN70	CATF_HUMAN	CTSF	25	4	19.9106	19.6247	20.135	19.8287	20.3867	4	969134	142329	0.146862
P08238	CATH_HUMAN	CTSH	76	7	19.3471	19.1576	19.7038	19.4843	20.4864	4	709764	113723	0.160226
P02671	CATL2_HUMAN	CTSV	48	7	20.5507	20.7412	20.7284	20.4816	22.2632	4	1622510	144589	0.0891145
Q7Z6Z7	CATZ_HUMAN	CTSZ	22	3	21.4576	20.9728	21.1964	21.1815	22.1142	4	2429820	338776	0.139424
P55290	CAV1_HUMAN	CAV1	51	6	19.6665	19.7022	19.6582	19.1025	21.6904	4	768871	137770	0.179185
Q5TEC6	CAV2_HUMAN	CAV2	15	2	NaN	NaN	NaN	NaN	17.7362	0
Q8NBM8	CAVN1_HUMAN	CAVIN1	39	4	NaN	NaN	19.684	19.5462	19.7766	2	803967	54245.8	0.0674727
P07738	CAZA1_HUMAN	CAPZA1	37	5	19.9096	19.982	20.0773	20.0056	20.3186	4	1044840	50054.8	0.0479065
O00560	CAZA2_HUMAN	CAPZA2	41	5	20.0719	20.2265	20.3369	20.2791	20.2528	4	1231450	94951.5	0.0771057
P60174	CBG_HUMAN	SERPINA6	72	8	21.4219	21.5106	21.5307	21.4794	NaN	4	2937640	95879.7	0.0326383
O00187	CBLN2_HUMAN	CBLN2	11	1	19.0042	18.923	18.8352	19.0414	18.9025	4	507531	31920.4	0.0628935
P53004	CBLN4_HUMAN	CBLN4	18	3	21.43	20.9881	21.1994	21.2318	19.7868	4	2443980	305342	0.124936
O00299	CBPA4_HUMAN	CPA4	60	8	NaN	NaN	NaN	NaN	19.0299	0
Q8NCG7	CBPB2_HUMAN	CPB2	86	10	23.357	23.4319	23.4899	23.3369	18.2599	4	11109000	545125	0.0490708
P01019	CBPD_HUMAN	CPD	44	7	19.7793	19.9148	19.9939	19.9887	20.2921	4	993197	67253.7	0.0677143
Q93088	CBPM_HUMAN	CPM	9	2	20.5497	20.6997	20.4242	20.488	NaN	4	1528890	127274	0.083246
Q10469	CBPN_HUMAN	CPN1	31	4	22.5659	22.8074	22.8488	22.6944	19.7607	4	6972580	603022	0.0864849
P16152	CBPQ_HUMAN	CPQ	56	7	22.7218	22.715	22.7294	22.6342	19.2234	4	6816620	206472	0.0302895
P48723	CBR1_HUMAN	CBR1	31	5	20.812	21.1515	21.1459	21.1753	20.9741	4	2214700	250008	0.112886
P24666	CBR3_HUMAN	CBR3	6	1	21.9249	21.9729	22.1559	22.0818	22.0114	4	4302470	312868	0.0727183
P30530	CBSL_HUMAN;CBS_HUMAN	CBS;CBSL	11	2	17.3725	18.9353	18.6839	18.9751	18.6623	4	401858	160248	0.398767
P62820	CBX3_HUMAN	CBX3	12	2	20.1059	NaN	20.243	19.3665	20.2003	3	1015090	299074	0.294628
P48509	CC126_HUMAN	CCDC126	6	1	21.4099	21.7429	21.5657	21.6098	NaN	4	3150040	297912	0.0945741
O00338	CCAR2_HUMAN	CCAR2	8	1	NaN	NaN	NaN	NaN	18.8069	0
Q9UBG0	CCBE1_HUMAN	CCBE1	44	6	20.3826	20.2252	20.363	19.3852	20.3253	4	1156510	320710	0.277309
Q5SRP5	CCD62_HUMAN	CCDC62	7	1	NaN	NaN	NaN	NaN	18.0525	0
Q6W4X9	CCD63_HUMAN	CCDC63	6	1	22.1173	22.002	22.0801	21.8689	21.462	4	4253380	317490	0.0746441
P05062	CCN1_HUMAN	CCN1	130	13	20.9344	21.4564	20.9532	19.9977	22.3163	4	1989670	748113	0.375998
Q07954	CCN2_HUMAN	CCN2	85	9	20.2148	20.0631	20.025	18.7634	21.3806	4	956073	346888	0.362826
P02679	CCS_HUMAN	CCS	10	1	18.6097	NaN	NaN	NaN	18.8529	1	400028	NaN	NaN
P08637	CD109_HUMAN	CD109	138	15	20.5232	20.2865	20.4657	20.706	20.6552	4	1486120	178112	0.11985
P26992	CD14_HUMAN	CD14	145	12	22.5798	22.642	22.7406	22.5733	NaN	4	6515750	355812	0.0546081
P30044	CD151_HUMAN	CD151	20	2	21.0802	20.9168	21.1793	21.0881	22.4852	4	2200080	163516	0.0743228
P00491	CD166_HUMAN	ALCAM	131	15	20.655	20.5709	20.5118	20.463	20.5492	4	1537300	88668.8	0.0576783
Q3SY69	CD248_HUMAN	CD248	24	3	20.7098	20.7323	20.384	20.706	19.7556	4	1633960	177615	0.108702
P12277	CD276_HUMAN	CD276	27	2	18.9416	19.2891	19.001	19.2634	19.206	4	574516	70482.5	0.122682
Q13508	CD44_HUMAN	CD44	61	7	21.6675	20.8337	21.0186	20.9807	23.6132	4	2348370	664209	0.282838
P63218	CD47_HUMAN	CD47	15	2	NaN	19.3113	19.4182	18.2939	20.9864	3	557495	206017	0.36954
Q9BQ51	CD59_HUMAN	CD59	57	4	19.9891	19.651	19.9601	19.3083	21.6464	4	883290	184270	0.208617
P13639	CD63_HUMAN	CD63	46	5	20.869	20.9604	20.7958	18.8123	23.5901	4	1559070	738016	0.473369	+
J3KSV1	CD81_HUMAN	CD81	27	3	19.8144	19.6213	19.6892	NaN	21.9389	3	857928	58777.1	0.0685106	+
P12111	CD82_HUMAN	CD82	22	3	19.4742	19.4196	19.1905	NaN	21.3799	3	675952	68606.1	0.101496	+
P49721	CD9_HUMAN	CD9	42	5	21.0642	21.1251	20.8257	19.5819	23.4552	4	1780740	688961	0.386896	+
Q96KP4	CD99_HUMAN	CD99	22	2	19.8232	19.3064	19.5054	18.1288	20.4585	4	651706	269569	0.413636
P32942	CDC37_HUMAN	CDC37	28	3	NaN	19.6612	19.4145	19.2319	19.752	3	714544	107568	0.150541
P28070	CDC42_HUMAN	CDC42	83	8	20.6865	20.7831	20.8486	20.5391	21.7877	4	1725940	157995	0.0915413
P01871	CDCP1_HUMAN	CDCP1	93	11	20.1431	20.011	20.1206	19.3555	21.4782	4	1006320	228000	0.226567
P21810	CDHR2_HUMAN	CDHR2	24	3	19.3972	19.4316	19.3407	19.4555	NaN	4	695112	23848.5	0.0343088
P06681	CDHR5_HUMAN	CDHR5	31	4	21.1069	21.3747	21.3634	21.1585	NaN	4	2504030	238639	0.095302
P07942	CDK1_HUMAN	CDK1	22	3	19.7363	20.2479	20.3279	19.7563	20.8254	4	1080070	233468	0.21616
P09211	CDK2_HUMAN;CDK3_HUMAN	CDK2;CDK3	4	1	18.0793	18.9369	18.2694	NaN	18.6672	3	364934	120180	0.32932
Q9HC38	CELF1_HUMAN	CELF1	18	2	NaN	19.0534	19.5125	NaN	19.5453	2	645986	144168	0.223175
O00622	CEP55_HUMAN	CEP55	8	1	NaN	NaN	NaN	NaN	17.6673	0
P24821	CERT_HUMAN	CERT1	6	1	NaN	NaN	NaN	NaN	16.5536	0
P68431;P84243;Q16695;Q71DI3	CERU_HUMAN	CP	686	43	24.468	24.5201	24.5364	24.4209	19.3268	4	23514900	850718	0.0361779
P18669	CFAB_HUMAN	CFB	336	29	22.7129	22.8859	22.8246	22.6783	22.9151	4	7191450	482702	0.0671216
Q15063	CFAD_HUMAN	CFD	130	10	21.3027	21.3948	21.4383	21.3135	20.6063	4	2697930	122477	0.0453967
O15031	CFAH_HUMAN	CFH	6	1	NaN	NaN	22.2388	22.4396	23.7241	2	5318840	522759	0.0982844
P05556	CH60_HUMAN	HSPD1	77	10	19.6265	19.3775	19.6683	19.4697	21.4268	4	762441	71076.8	0.0932228
P12273	CHAD_HUMAN	CHAD	40	5	NaN	18.8943	19.4021	NaN	21.7991	2	590022	145351	0.246348
Q14240	CHIP_HUMAN	STUB1	15	2	18.4989	18.5777	18.4668	18.5545	19.371	4	377244	13235.7	0.0350853
O60814;P57053;P58876;P62807;Q5QNW6;Q93079;Q99877;Q99879;Q99880	CHLE_HUMAN	BCHE	115	15	22.749	22.8373	22.7752	22.7783	17.0434	4	7228630	188310	0.0260506
O95336	CHM1A_HUMAN	CHMP1A	16	2	NaN	20.5878	19.7838	NaN	21.2054	2	1239280	476093	0.384169
Q99436	CHM1B_HUMAN	CHMP1B	27	4	20.2357	20.0444	20.0339	19.6421	22.7743	4	1051950	172585	0.164063
P01116	CHM2A_HUMAN	CHMP2A	42	6	NaN	19.4674	19.5116	NaN	22.6449	2	736181	15948.8	0.0216643
P48163	CHM2B_HUMAN	CHMP2B	28	4	20.1363	19.6497	19.8632	19.2499	20.6553	4	888029	222492	0.250546
P04424	CHM4A_HUMAN	CHMP4A	19	3	NaN	NaN	NaN	NaN	18.3854	0
Q00796	CHM4B_HUMAN	CHMP4B	30	3	19.7164	19.6456	19.6262	19.5565	21.3332	4	815484	37188.9	0.0456034
P05783	CHMP3_HUMAN	CHMP3	7	1	NaN	19.6674	NaN	NaN	20.6214	1	832661	NaN	NaN
P62826	CHMP5_HUMAN	CHMP5	18	2	20.4577	20.1446	19.9873	19.3868	22.5901	4	1081030	312626	0.289194
Q8N6C8	CHP1_HUMAN	CHP1	18	2	NaN	NaN	NaN	NaN	18.9053	0
H7BZJ3	CHRD_HUMAN	CHRD	21	3	NaN	NaN	NaN	NaN	18.6799	0
Q9Y3U8	CHSP1_HUMAN	CARHSP1	21	1	18.7693	19.2337	19.0326	19.2688	19.8041	4	557807	85012.2	0.152405
P27169	CHSS2_HUMAN	CHPF	9	1	NaN	19.5959	19.6393	19.4669	19.7902	3	777903	47673.7	0.0612849
P08195	CHST3_HUMAN	CHST3	36	5	20.8843	20.7954	20.6975	20.8153	22.0954	4	1825250	96881.8	0.0530787
Q14624	CHST5_HUMAN	CHST5	7	1	NaN	NaN	NaN	18.2868	19.1031	1	319806	NaN	NaN
P02144	CHST7_HUMAN	CHST7	6	1	NaN	NaN	NaN	NaN	16.787	0
P35625	CHSTE_HUMAN	CHST14	19	2	18.4666	18.8547	18.3711	18.3372	18.6502	4	376625	66271.4	0.175961
P22105	CILP1_HUMAN	CILP	22	2	18.4659	18.5955	NaN	NaN	19.1398	2	379079	24064	0.0634802
P40123	CILP2_HUMAN	CILP2	50	6	20.0899	20.0669	20.1951	20.0861	20.0573	4	1131950	46278	0.0408836
A0A0B4J1V0;A0A0B4J1V6;A0A0B4J1Y9	CISY_HUMAN	CS	22	2	17.9721	NaN	NaN	NaN	19.8207	1	257131	NaN	NaN
A0A2R8YDW8	CK054_HUMAN	C11orf54	11	1	20.3584	20.4891	20.3432	20.4665	20.6318	4	1398760	71924	0.05142
P48637	CKAP5_HUMAN	CKAP5	44	6	NaN	18.0005	NaN	NaN	19.2441	1	262231	NaN	NaN
P05386	CLAP1_HUMAN	CLASP1	65	8	NaN	NaN	NaN	NaN	18.3468	0
P12821	CLC11_HUMAN	CLEC11A	58	5	20.9963	21.1849	21.3823	21.328	21.5859	4	2460430	286349	0.116381
P11047	CLCA_HUMAN	CLTA	27	4	NaN	NaN	NaN	NaN	19.7868	0				+
Q7LGC8	CLCB_HUMAN	CLTB	14	2	NaN	NaN	NaN	NaN	19.1429	0				+
Q9UHG3	CLD1_HUMAN	CLDN1	52	6	20.4514	20.3757	20.1578	19.09	22.1612	4	1130510	397553	0.351657
P02743	CLDN1_HUMAN	CLDND1	15	2	NaN	NaN	NaN	NaN	16.7244	0
Q13126	CLH1_HUMAN	CLTC	482	51	19.8929	19.9763	19.8895	19.4445	21.1797	4	922450	142071	0.154015	+
P10412;P16402;P16403;P22492;Q02539	CLIC1_HUMAN	CLIC1	89	11	21.0581	21.1	21.1144	21.0823	21.4813	4	2230320	37417	0.0167765
P07437	CLIC4_HUMAN	CLIC4	64	7	19.4335	19.6134	19.5172	19.5035	20.3617	4	750934	38797.1	0.0516651
P05787	CLN5_HUMAN	CLN5	34	4	20.2169	20.2647	19.8688	19.9054	18.9027	4	1104460	156806	0.141975
O75083	CLUS_HUMAN	CLU	80	8	20.4246	20.3025	20.479	20.1508	20.2164	4	1331530	131828	0.0990055
Q13228	CMBL_HUMAN	CMBL	14	2	19.1754	19.8358	19.3575	19.1027	19.0202	4	690635	169789	0.245844
Q12860	CN37_HUMAN	CNP	15	2	NaN	NaN	NaN	NaN	18.8179	0
Q99536	CNDP1_HUMAN	CNDP1	333	25	24.5827	24.6206	24.7047	24.545	18.6694	4	25686400	1229220	0.0478548
Q93063	CNDP2_HUMAN	CNDP2	17	2	20.8019	21.0785	21.0236	21.009	21.1238	4	2071110	168175	0.0812001
Q93099	CNMD_HUMAN	CNMD	5	1	20.2471	20.3073	20.2111	20.034	20.4366	4	1207340	95658.2	0.0792303
P37837	CNN2_HUMAN	CNN2	69	7	19.3871	19.4667	19.5246	19.4686	20.5808	4	722471	28158.5	0.0389752
O00754	CNOT1_HUMAN	CNOT1	12	2	NaN	17.8661	NaN	NaN	18.4553	1	238916	NaN	NaN
P21926	CNRP1_HUMAN	CNRIP1	10	1	20.1571	19.6344	19.9094	20.163	18.9137	4	1035440	172025	0.166137
Q8TER0	CNTFR_HUMAN	CNTFR	39	4	21.1286	21.1244	21.1645	20.7078	18.444	4	2160430	299892	0.138812
Q12794	CNTN1_HUMAN	CNTN1	201	23	20.3762	20.7952	20.9202	20.9546	21.0825	4	1799290	306042	0.170091
Q86UX7	CNTN3_HUMAN	CNTN3	34	4	19.5657	19.8268	19.9539	19.819	19.7063	4	911620	99529.9	0.109179
P58546	CNTN4_HUMAN	CNTN4	76	10	19.8677	20.0003	20.1293	20.032	20.2509	4	1056120	78395.7	0.0742298
Q15404	CNTN5_HUMAN	CNTN5	9	1	19.3032	19.4242	19.6589	19.4079	19.9058	4	718450	77077.8	0.107283
P35052	CO1A1_HUMAN	COL1A1	48	6	20.7079	20.3181	20.3457	20.5368	21.6482	4	1468430	188816	0.128583
P32119	CO1A2_HUMAN	COL1A2	63	7	20.4648	20.144	20.2971	20.4388	21.5599	4	1328880	133087	0.10015
Q9H4A9	CO2_HUMAN	C2	44	5	20.9448	20.8331	21.0151	21.0092	22.1505	4	2029080	116634	0.0574812
P78386	CO2A1_HUMAN	COL2A1	52	6	20.1634	19.5578	19.7143	19.8622	19.774	4	939834	172978	0.184052
Q01581	CO3_HUMAN	C3	219	22	23.5856	23.2314	23.3169	23.4047	24.1429	4	10997700	1178410	0.10715
P14625	CO4A1_HUMAN	COL4A1	49	3	20.9651	20.4723	20.5541	20.0086	19.4087	4	1524030	407700	0.267514
P09972	CO4A2_HUMAN	COL4A2	78	9	21.0607	20.3751	20.5025	19.8227	19.6291	4	1490000	522751	0.350839
P25789	CO4B_HUMAN	C4B	102	8	20.2916	20.4326	20.3979	20.3765	21.7948	4	1360390	55891.4	0.041085
Q9BXJ4	CO5_HUMAN	C5	10	1	18.6414	19.0149	18.7353	18.9473	NaN	4	470138	56827.5	0.120874
Q9NQ79	CO5A1_HUMAN	COL5A1	84	9	19.8839	19.7406	19.9797	19.7901	21.561	4	946016	69859.1	0.0738456
Q6P996	CO6_HUMAN	C6	27	2	19.1852	19.6505	19.5478	19.394	19.9211	4	718604	98426.6	0.136969
Q8WWZ8	CO6A1_HUMAN	COL6A1	111	11	22.026	22.1869	22.3126	22.2711	22.5118	4	4828830	413624	0.0856573
Q8NBJ4	CO6A2_HUMAN	COL6A2	82	10	19.9518	20.4496	20.4906	20.4002	19.9216	4	1325810	210967	0.159123
Q14118	CO6A3_HUMAN	COL6A3	169	21	20.5043	21.0952	21.1801	21.0603	21.1567	4	2072550	398228	0.192144
P06865	CO6A6_HUMAN	COL6A6	10	1	21.6843	22.11	22.0632	22.3428	20.1671	4	4399490	800535	0.181961
P00352	CO7A1_HUMAN	COL7A1	305	34	21.2633	20.5557	20.6126	20.0235	19.5035	4	1681860	606393	0.360549
P62249	CO8A_HUMAN	C8A	7	1	20.5084	19.8741	20.0572	20.4042	23.2934	4	1232790	248329	0.201436
P40616	CO8B_HUMAN	C8B	24	3	22.2705	22.2763	22.4397	22.4911	23.0303	4	5430790	425805	0.0784058
P60953	CO9A1_HUMAN	COL9A1	36	5	20.7463	20.6318	20.5966	20.3685	19.276	4	1580770	168590	0.106651
K7EIR9;K7ELS1	CO9A3_HUMAN	COL9A3	15	2	19.672	19.7639	19.4768	19.2778	18.6695	4	772716	113122	0.146395
P08709	COAA1_HUMAN	COL10A1	6	1	21.5747	20.484	21.4868	21.3632	20.5485	4	2556540	747304	0.292311
Q8WXW3	COBA1_HUMAN	COL11A1	33	4	19.1677	18.378	19.5803	NaN	18.3459	3	571158	222151	0.388949
P22897	COBA2_HUMAN	COL11A2	6	1	17.5107	NaN	NaN	NaN	19.6612	1	186741	NaN	NaN
Q7L9L4;Q9H8S9	COCA1_HUMAN	COL12A1	255	31	19.9232	19.8921	19.9133	20.0154	20.6329	4	1003630	38502.7	0.0383634
P23528	COEA1_HUMAN	COL14A1	32	5	19.0906	19.4321	19.2266	19.5793	20.7227	4	665613	99753.3	0.149867
P27930	COF1_HUMAN	CFL1	73	6	20.6595	20.6003	20.9376	20.5415	21.94	4	1695130	215481	0.127118
P23396	COFA1_HUMAN	COL15A1	31	5	21.3548	21.5274	21.5222	21.5217	21.6891	4	2931830	166697	0.0568578
P50395	COHA1_HUMAN	COL17A1	23	2	19.4032	NaN	19.4269	19.1357	18.5263	3	658048	71305	0.108358
P21399	COIA1_HUMAN	COL18A1	103	12	20.131	20.0605	20.0468	19.5062	20.9451	4	1017380	184056	0.180912
P17858	COL10_HUMAN	COLEC10	39	5	21.4263	21.4875	21.4718	21.5324	20.9296	4	2924920	88787.7	0.0303556
P21333	COL12_HUMAN	COLEC12	6	1	18.8485	NaN	18.6035	18.7166	19.0371	3	433701	36940.9	0.085176
P01602	COLA1_HUMAN	COL21A1	53	6	20.3259	19.9064	20.6034	20.0987	22.0799	4	1253250	264238	0.210842
Q02388	COMD3_HUMAN	COMMD3	9	1	NaN	NaN	NaN	NaN	18.4989	0
P09382	COMD4_HUMAN	COMMD4	12	1	NaN	NaN	NaN	18.2717	17.9934	1	316470	NaN	NaN
Q8N8N7	COMD5_HUMAN	COMMD5	5	1	20.2552	19.6172	19.7309	19.8956	18.7511	4	975310	197159	0.20215
P28066	COMP_HUMAN	COMP	167	14	22.0903	21.93	22.0867	22.1282	23.3519	4	4374740	259536	0.0593262
O00487	COPA_HUMAN	COPA	38	5	19.3575	19.6054	19.311	19.44	20.0774	4	707759	65015.8	0.0918614
P30041	COPB_HUMAN	COPB1	59	7	19.0666	19.5233	19.383	19.391	19.8632	4	668452	85801.8	0.128359
Q12907	COPB2_HUMAN	COPB2	37	5	NaN	NaN	NaN	NaN	17.8193	0
Q9H4G4	COPD_HUMAN	ARCN1	43	6	20.4188	19.2177	19.009	19.1263	20.1446	4	777817	417308	0.536512
O00462	COPG1_HUMAN	COPG1	40	5	18.7583	18.9423	18.8133	18.8304	19.7293	4	468480	25407.6	0.0542342
P07988	COPZ1_HUMAN	COPZ1	6	1	NaN	NaN	NaN	NaN	18.5484	0
P62244	COR1A_HUMAN	CORO1A	29	4	21.434	22.1424	22.2038	22.1776	22.8652	4	4259330	954375	0.224067
Q9UGT4	COR1B_HUMAN	CORO1B	30	4	19.3851	19.6794	19.6968	19.7231	20.2464	4	809898	84148.6	0.1039
Q8NBJ5	COR1C_HUMAN	CORO1C	94	10	19.6484	20.187	19.9584	19.9254	20.9676	4	1007510	152108	0.150975
Q9UBQ7	COTL1_HUMAN	COTL1	57	7	21.4815	20.9825	21.0411	21.1028	23.159	4	2352430	390697	0.166082
P05186	CP4B1_HUMAN	CYP4B1	7	1	20.5168	19.6643	20.2195	20.5354	21.8341	4	1267960	321781	0.253779
P05387	CPN2_HUMAN	CPN2	151	13	23.2241	23.2909	23.2661	23.1452	NaN	4	9856430	431255	0.0437537
Q9H299	CPNE1_HUMAN	CPNE1	21	3	19.3765	19.7202	19.231	NaN	20.7093	3	719884	128773	0.178881
P22061	CPNE2_HUMAN	CPNE2	12	2	NaN	NaN	17.3517	NaN	19.1337	1	167260	NaN	NaN
P17655	CPNE3_HUMAN	CPNE3	17	2	NaN	NaN	NaN	NaN	17.8092	0
Q9HCU0	CPNE8_HUMAN	CPNE8	58	8	19.8674	20.1685	19.7432	18.7455	20.7213	4	863022	309766	0.358931
P61981	CPNS1_HUMAN	CAPNS1	32	4	19.9894	20.033	20.1147	19.9744	20.9898	4	1069800	47310.9	0.044224
P43490	CPSF5_HUMAN	NUDT21	22	3	18.9482	18.9795	NaN	NaN	20.1336	2	511350	7859.51	0.0153701
P98160	CPSM_HUMAN	CPS1	27	4	NaN	19.0794	19.16	19.0771	18.4419	3	564268	18618.7	0.0329963
P05388	CPVL_HUMAN	CPVL	27	3	NaN	NaN	NaN	NaN	18.909	0
O60911	CR2_HUMAN	CR2	10	1	20.4802	20.2068	20.4723	20.5129	20.6767	4	1405950	131769	0.0937223
P27105	CRAC1_HUMAN	CRTAC1	70	8	20.768	20.6806	20.7497	20.7561	19.2427	4	1750100	47203.5	0.0269719
P52209	CRGC_HUMAN	CRYGC	7	1	20.333	20.3346	20.5524	20.6891	20.1479	4	1467870	180145	0.122725
P25788	CRIM1_HUMAN	CRIM1	68	8	NaN	NaN	NaN	NaN	18.3062	0
P67775	CRIS3_HUMAN	CRISP3	22	2	23.5287	23.4005	23.4707	23.3447	NaN	4	11363000	633141	0.0557194
P17301	CRK_HUMAN	CRK	17	2	18.3841	NaN	18.6663	NaN	20.0832	2	379069	52254	0.137848
P28161	CRKL_HUMAN	CRKL	19	2	18.8708	19.0344	18.6929	18.6719	19.0139	4	464426	55751.3	0.120043
P61586	CRLF3_HUMAN	CRLF3	17	2	19.4318	NaN	NaN	NaN	17.987	1	707200	NaN	NaN
P11166	CRTAP_HUMAN	CRTAP	31	4	NaN	19.923	NaN	NaN	19.7499	1	994073	NaN	NaN
Q9BRK3	CRYAB_HUMAN	CRYAB	6	1	17.4831	17.2654	17.1852	NaN	17.9405	3	163261	17792.7	0.108984
Q9UM47	CSAD_HUMAN	CSAD	19	2	20.3256	20.6389	20.6499	20.5758	20.4398	4	1538750	154118	0.100158
O43175	CSF1R_HUMAN	CSF1R	78	9	22.4243	22.4096	22.4593	22.3947	NaN	4	5620150	108203	0.0192526
O43765	CSK_HUMAN	CSK	16	2	NaN	18.4306	NaN	NaN	18.929	1	353305	NaN	NaN
P34913	CSK21_HUMAN;CSK23_HUMAN	CSNK2A1;CSNK2A3	26	3	NaN	NaN	NaN	NaN	17.3548	0
P55263	CSK2B_HUMAN	CSNK2B	6	1	17.9967	17.8513	NaN	NaN	19.4761	2	249008	17730.4	0.0712041
P20849	CSKP_HUMAN	CASK	8	1	NaN	NaN	NaN	NaN	19.306	0
Q07075	CSN1_HUMAN	GPS1	32	4	19.5392	20.3738	19.9657	20.1964	20.0549	4	1086500	255998	0.235618
P62330	CSN2_HUMAN	COPS2	42	5	18.8827	19.9659	19.8697	19.6064	19.8821	4	815913	241143	0.29555
P62873	CSN3_HUMAN	COPS3	6	1	NaN	18.2127	17.8324	18.0589	19.0198	3	270078	35292.3	0.130674
Q15691	CSN4_HUMAN	COPS4	19	3	NaN	18.5296	NaN	18.5019	19.9095	2	374816	5094.95	0.0135932
P60900	CSN5_HUMAN	COPS5	26	3	19.4543	19.2671	19.3778	19.3578	19.397	4	675602	35906.8	0.0531478
P46782	CSN6_HUMAN	COPS6	25	4	NaN	19.3003	18.6735	19.5879	18.863	3	617244	186582	0.302282
Q9NZN3	CSN7B_HUMAN	COPS7B	9	1	NaN	NaN	NaN	20.139	20.9897	1	1154610	NaN	NaN
P50454	CSN8_HUMAN	COPS8	16	2	19.1182	19.2488	18.7704	19.0755	18.749	4	547906	73595.8	0.134322
P08962	CSPG2_HUMAN	VCAN	119	13	21.6269	21.6638	21.4994	21.1754	19.8663	4	2973450	431453	0.145102
P15291	CSPG4_HUMAN	CSPG4	287	28	19.8023	19.8392	19.8765	19.8826	20.5549	4	945366	24274.3	0.0256772
Q99466	CSRP1_HUMAN	CSRP1	28	4	NaN	19.2106	19.3572	19.1092	20.7957	3	614604	53474.6	0.0870066
P05546	CSTN1_HUMAN	CLSTN1	161	19	19.7231	19.8319	20.0466	19.8975	21.7401	4	964595	91259.3	0.094609
Q9P2B2	CTBP1_HUMAN	CTBP1	16	2	19.6372	19.8571	19.6833	19.7499	20.4639	4	872173	58401.1	0.0669604
Q92484	CTL1_HUMAN	SLC44A1	51	5	19.095	19.2366	19.0566	NaN	20.8617	3	574323	38288.7	0.0666676
P06312	CTL2_HUMAN	SLC44A2	31	4	NaN	18.2957	NaN	NaN	18.8884	1	321778	NaN	NaN
P36543	CTNA1_HUMAN	CTNNA1	153	19	19.5806	19.6389	19.3988	18.768	21.5173	4	684522	167374	0.244512
Q8IYS5	CTNB1_HUMAN	CTNNB1	70	9	19.6961	19.8074	19.6754	18.8386	21.3009	4	768253	202745	0.263904
P27348	CTND1_HUMAN	CTNND1	105	11	19.6229	19.5994	19.2592	19.6262	20.0486	4	759611	88345.8	0.116304
O95302	CUL1_HUMAN	CUL1	20	2	NaN	NaN	NaN	NaN	17.3943	0
Q06830	CUL2_HUMAN	CUL2	19	2	18.4572	18.8782	18.7647	18.719	18.9216	4	429663	51123.9	0.118986
P04075	CUL3_HUMAN	CUL3	27	4	17.7824	18.8954	18.7258	18.8491	19.5047	4	404706	121655	0.300602
Q9Y600	CUL4A_HUMAN	CUL4A	31	4	18.6113	19.0699	18.6124	18.6873	18.8911	4	443417	71989.4	0.162352
Q13740	CUTA_HUMAN	CUTA	6	1	21.5814	20.6932	21.2019	21.2932	21.5641	4	2453830	594010	0.242075
P62263	CYBP_HUMAN	CACYBP	29	3	18.8511	18.0445	18.2575	NaN	20.2607	3	352199	106702	0.302958
P22304	CYFP1_HUMAN	CYFIP1	60	7	19.2038	19.7034	19.474	18.8791	20.6199	4	666989	159972	0.239842
P14384	CYRIB_HUMAN	CYRIB	43	4	19.5395	19.7059	19.7308	19.8233	20.6683	4	853747	68665.2	0.0804281
P61247	CYTB_HUMAN	CSTB	10	1	20.0467	19.8	19.7514	19.8833	18.4669	4	961398	88335.2	0.091882
P02462	CYTC_HUMAN	CST3	39	4	19.9768	20.0717	20.1685	20.0396	18.9515	4	1097510	61299.8	0.0558537
P62269	CZIB_HUMAN	CZIB	10	1	19.7495	18.5982	18.5441	19.8384	19.3603	4	649495	301099	0.463589
Q14766	D2HDH_HUMAN	D2HGDH	10	1	20.4824	20.556	NaN	NaN	20.4693	2	1503280	54199	0.0360539
P13598	DAF_HUMAN	CD55	32	4	19.3884	19.6375	19.294	19.1768	20.4361	4	684333	95513.1	0.139571
O75340	DAG1_HUMAN	DAG1	26	3	20.6994	20.6066	20.5857	21.0072	20.951	4	1745140	248127	0.142181
P00533	DBNL_HUMAN	DBNL	12	1	NaN	NaN	NaN	NaN	18.6625	0
Q15257	DC1I2_HUMAN	DYNC1I2	14	2	NaN	17.5439	NaN	NaN	18.9531	1	191093	NaN	NaN
Q9NPH2	DCBD2_HUMAN	DCBLD2	18	3	20.098	20.3521	20.4486	20.3974	20.3632	4	1318210	135994	0.103165
Q8N465	DCD_HUMAN	DCD	10	1	21.518	21.3343	22.4432	21.979	19.747	4	3870890	1376280	0.355546
Q03154	DCNL1_HUMAN	DCUN1D1	7	1	NaN	NaN	17.7453	NaN	19.0792	1	219718	NaN	NaN
P63244	DCTN1_HUMAN	DCTN1	74	9	19.0092	19.2472	19.2923	18.9905	19.4901	4	578195	62878.3	0.108749
P06899;P23527;P33778;Q16778;Q8N257	DCTN2_HUMAN	DCTN2	49	6	19.0199	19.4211	19.4247	19.4149	19.8393	4	659067	85016.5	0.128995
Q96RW7	DCUP_HUMAN	UROD	18	3	20.2497	20.4789	20.3986	20.3225	20.7136	4	1350400	92380	0.0684095
P08572	DCXR_HUMAN	DCXR	7	1	21.3834	21.6225	21.7244	21.8047	21.2901	4	3273080	399955	0.122195
Q13308	DD19A_HUMAN;DDX25_HUMAN	DDX19A;DDX25	6	1	NaN	NaN	NaN	NaN	18.156	0
Q6YHK3	DDAH1_HUMAN	DDAH1	15	2	NaN	NaN	NaN	NaN	18.5239	0
Q13404	DDAH2_HUMAN	DDAH2	30	4	19.8759	19.7029	20.088	19.8744	22.2539	4	972810	107381	0.110382
P22303	DDB1_HUMAN	DDB1	43	6	18.9427	18.764	19.1394	19.0955	19.4007	4	521669	59907.7	0.114838
P35590	DDR1_HUMAN	DDR1	32	4	19.8126	19.5291	19.6839	19.4988	19.3079	4	815130	83405.7	0.102322
Q9HCB6	DDX1_HUMAN	DDX1	29	4	NaN	18.4834	18.4738	NaN	20.8109	2	365268	1721.01	0.00471163
O14786	DDX17_HUMAN	DDX17	42	6	NaN	NaN	NaN	NaN	18.4594	0
P62701	DDX21_HUMAN	DDX21	33	4	NaN	NaN	NaN	NaN	18.2883	0
P09455	DDX3X_HUMAN	DDX3X	76	11	19.7088	19.9778	19.3943	19.4979	20.3081	4	829741	152364	0.183629
P49908	DDX5_HUMAN	DDX5	104	12	19.704	19.817	19.1786	18.4593	20.5594	4	682874	257725	0.377412
P02452	DDX6_HUMAN	DDX6	15	2	19.137	19.8551	19.2362	19.1764	20.2312	4	683728	177238	0.259224
P07315	DEF1_HUMAN;DEF3_HUMAN	DEFA1;DEFA3	17	2	22.6969	22.338	22.919	22.638	NaN	4	6639560	1079350	0.162564
P49720	DENR_HUMAN	DENR	8	1	NaN	NaN	NaN	NaN	17.6754	0
P11234	DEOC_HUMAN	DERA	43	5	18.7388	19.2529	NaN	NaN	18.8881	2	531113	132423	0.249332
P07148	DESP_HUMAN	DSP	6	1	NaN	NaN	NaN	NaN	16.7217	0
Q92859	DEST_HUMAN	DSTN	58	6	19.408	19.9264	19.9804	19.6672	20.8892	4	889764	156248	0.175606
O75891	DGLB_HUMAN	DAGLB	8	1	21.0319	20.9389	21.1163	21.2433	19.8689	4	2227460	200989	0.0902324
P09467	DHE3_HUMAN;DHE4_HUMAN	GLUD1;GLUD2	9	1	NaN	NaN	NaN	NaN	18.3845	0
P62277	DHPR_HUMAN	QDPR	12	2	19.8044	20.0042	20.1856	20.2013	19.8039	4	1091350	136304	0.124894
P03951	DHR11_HUMAN	DHRS11	27	3	19.6897	19.9576	19.8923	19.9523	19.6108	4	962895	80775.2	0.0838878
Q14974	DHSO_HUMAN	SORD	33	3	20.5299	21.0993	20.8468	20.9368	20.2809	4	1913460	305588	0.159704
P84085	DHX15_HUMAN	DHX15	23	3	18.7558	18.9741	18.5564	NaN	19.5701	3	447702	64865.8	0.144886
P07451	DHX9_HUMAN	DHX9	54	7	19.6913	19.3533	NaN	19.7393	19.7341	3	797192	111285	0.139596
O00533	DIAC_HUMAN	CTBS	153	12	23.0199	23.0781	23.2145	23.039	NaN	4	8928160	556456	0.0623259
Q6V0I7	DIAP1_HUMAN	DIAPH1	65	8	18.8478	19.1035	19.3831	19.1682	19.8981	4	576982	87169.9	0.151079
P10599	DIK2B_HUMAN	DIPK2B	12	2	20.0946	20.2142	20.3543	20.2314	20.6973	4	1226880	90446.5	0.073721
P15121	DIP2B_HUMAN	DIP2B	97	12	NaN	18.8231	19.9802	20.1575	20.0491	3	889218	374581	0.421247
Q14117	DJB11_HUMAN	DNAJB11	47	6	20.4846	20.6553	20.1142	19.7267	22.5475	4	1280280	348359	0.272096
Q14376	DKK1_HUMAN	DKK1	57	6	19.9038	19.9083	NaN	NaN	21.6018	2	982484	2147.35	0.00218563
Q9Y6R7	DKK3_HUMAN	DKK3	40	5	19.3373	19.3431	19.1	19.0652	20.7697	4	609469	62886.3	0.103182
P11021	DLRB1_HUMAN	DYNLRB1	7	1	NaN	NaN	NaN	NaN	18.9406	0
P31939	DMBT1_HUMAN	DMBT1	22	2	21.7371	21.7078	21.8984	21.8975	21.4407	4	3684100	259878	0.0705406
P26641	DMKN_HUMAN	DMKN	7	1	19.5714	20.3255	20.051	20.181	19.3323	4	1092030	228469	0.209216
O76003	DNJA1_HUMAN	DNAJA1	21	2	19.0372	17.9024	18.8148	17.875	19.9599	4	371117	151590	0.408471
Q8IYT4	DNJA2_HUMAN	DNAJA2	47	6	19.1193	18.7544	18.9135	18.0255	20.5124	4	443082	128614	0.29027
Q86WI1	DNJB1_HUMAN	DNAJB1	19	2	18.6433	18.3488	18.2151	NaN	17.7756	3	349186	54231.7	0.155309
P62829	DNJC3_HUMAN	DNAJC3	24	3	18.5723	19.29	18.7926	18.9267	19.6068	4	495798	106567	0.214941
Q96QD8	DNM1L_HUMAN	DNM1L	134	15	18.8507	19.4066	19.2939	19.3702	20.039	4	622025	101872	0.163775
Q03167	DNPEP_HUMAN	DNPEP	7	1	20.1391	19.5716	19.7196	19.3212	NaN	4	863068	212417	0.246118
Q16473	DOCK5_HUMAN	DOCK5	8	1	NaN	NaN	NaN	NaN	17.9169	0
P24158	DOPO_HUMAN	DBH	6	1	19.4774	19.7536	19.5739	19.7856	NaN	4	824519	83070.9	0.100751
P20023	DPEP2_HUMAN	DPEP2	12	2	20.7333	20.845	20.8031	20.5989	17.891	4	1761100	128972	0.073234
P04792	DPM1_HUMAN	DPM1	7	1	22.0891	24.0506	22.0939	22.1823	21.1248	4	7768190	6406380	0.824694
Q14956	DPP3_HUMAN	DPP3	53	7	20.0783	20.3405	20.3763	20.3778	19.9642	4	1289550	122715	0.0951606
O14818	DPP4_HUMAN	DPP4	230	26	22.9543	22.9711	22.9855	22.9089	17.4523	4	8132350	186206	0.022897
P06737	DPYD_HUMAN	DPYD	47	6	19.3754	19.9425	19.8985	19.995	20.469	4	927492	167242	0.180316
Q9H0W9	DPYL2_HUMAN	DPYSL2	118	13	19.5015	19.7003	19.8089	19.7316	20.7868	4	845769	74520.9	0.0881103
Q4LDE5	DPYS_HUMAN	DPYS	28	4	20.6829	20.1461	20.2644	20.6226	20.1873	4	1429410	258184	0.180622
P26572	DRG1_HUMAN	DRG1	24	3	19.5075	19.6568	19.4733	NaN	19.4652	3	766598	52682.6	0.0687226
Q01518	DSG2_HUMAN	DSG2	78	9	19.4384	19.2912	19.6432	NaN	19.5413	3	723602	89372.4	0.12351
P49788	DUS9_HUMAN	DUSP9	16	2	19.3538	19.3595	19.0406	19.1177	19.1206	4	612688	68805.7	0.112301
Q15274	DX39A_HUMAN	DDX39A	6	1	NaN	NaN	NaN	NaN	18.5287	0
P46531	DX39B_HUMAN	DDX39B	42	6	19.9443	20.1449	19.8402	20.0486	20.2526	4	1047840	95274.2	0.0909248
P25787	DYHC1_HUMAN	DYNC1H1	313	41	19.0664	19.5582	19.273	19.133	19.8646	4	632349	99577.2	0.157472
P07741	DYL1_HUMAN	DYNLL1	7	1	19.5779	19.2707	19.4184	19.2053	18.5087	4	680050	79395.8	0.11675
Q15758	DYN2_HUMAN	DNM2	69	10	19.626	20.072	19.7293	20.0641	20.0495	4	969188	152151	0.156988
P17813	DYN3_HUMAN	DNM3	64	7	NaN	18.9914	18.921	18.306	20.0197	3	447211	107344	0.240031
P63241	E41L2_HUMAN	EPB41L2	9	1	NaN	19.1677	NaN	NaN	17.9537	1	588934	NaN	NaN
P60842	E5RHN9_HUMAN	RAD54B	7	1	NaN	NaN	NaN	NaN	18.5519	0
Q01469	E9PFZ2_HUMAN;H7C5R1_HUMAN	CP	8	1	23.1978	23.1737	23.1987	23.163	NaN	4	9525550	117498	0.012335
Q86SQ4	ECM1_HUMAN	ECM1	35	4	19.6441	19.9134	19.6743	19.9226	19.215	4	909343	94213.3	0.103606
Q96PL1	ECM29_HUMAN	ECPAS	30	4	NaN	NaN	NaN	NaN	17.3823	0
Q04760	EEA1_HUMAN	EEA1	26	3	NaN	NaN	NaN	NaN	18.1198	0
P30566	EF1A1_HUMAN;EF1A3_HUMAN	EEF1A1;EEF1A1P5	190	17	22.594	22.5039	22.4672	22.278	23.1584	4	5790680	520811	0.0899395
P13647	EF1A2_HUMAN	EEF1A2	6	1	NaN	NaN	NaN	NaN	17.6588	0
P10586	EF1D_HUMAN	EEF1D	42	5	20.1022	19.9158	20.2283	19.9678	20.6648	4	1092130	107604	0.0985271
P00439	EF1G_HUMAN	EEF1G	106	13	20.4041	20.6256	20.3709	20.3105	21.3091	4	1415430	139648	0.0986617
Q15185	EF2_HUMAN	EEF2	296	34	20.926	21	21.066	20.9788	21.2315	4	2087790	84127.9	0.0402951
O15145	EFCB5_HUMAN	EFCAB5	6	1	NaN	NaN	NaN	NaN	19.1862	0
P10912	EFHD2_HUMAN	EFHD2	10	2	NaN	18.8878	18.0354	NaN	18.9223	2	376868	153027	0.40605
P0C0L5	EFL1_HUMAN	EFL1	13	2	NaN	NaN	NaN	NaN	17.9109	0
P02533	EFNB1_HUMAN	EFNB1	38	5	19.9935	19.4328	19.588	19.2322	19.7871	4	788864	183986	0.233229
Q00266	EGFL7_HUMAN	EGFL7	14	2	NaN	NaN	NaN	NaN	17.1294	0
O60938	EGFR_HUMAN	EGFR	173	19	20.5279	20.5256	20.6162	20.4372	19.7725	4	1512100	76624.5	0.0506742
P06132	EGLN_HUMAN	ENG	29	4	20.4194	20.3228	20.4505	20.3714	NaN	4	1375780	53140.1	0.0386255
Q9HBI1	EHD1_HUMAN	EHD1	36	5	18.9647	19.781	19.5916	19.4368	20.7457	4	728060	164209	0.225542
P31946	EHD2_HUMAN	EHD2	114	14	19.3217	19.5246	19.0239	18.752	21.7152	4	595996	137075	0.229993
P78509	EHD3_HUMAN	EHD3	144	16	20.1869	20.7878	20.7066	20.5583	21.4127	4	1564820	270789	0.173049
Q92743	EHD4_HUMAN	EHD4	57	7	19.6824	19.5601	19.3769	19.2484	20.8547	4	729490	96884.3	0.132811
P48506	EIF3A_HUMAN	EIF3A	12	2	18.9824	19.7623	19.3135	18.7968	20.3453	4	628548	192113	0.305645
P26006	EIF3B_HUMAN	EIF3B	35	4	19.337	19.5123	19.3607	19.4102	20.4177	4	695000	38020.8	0.0547061
P01008	EIF3C_HUMAN;EIFCL_HUMAN	EIF3C;EIF3CL	31	4	19.2449	19.4282	19.6767	NaN	19.9697	3	721586	109281	0.151446
P15144	EIF3D_HUMAN	EIF3D	19	3	NaN	NaN	NaN	NaN	18.7304	0
P51149	EIF3E_HUMAN	EIF3E	12	2	NaN	19.0755	NaN	NaN	19.6399	1	552462	NaN	NaN
P62857	EIF3F_HUMAN	EIF3F	32	4	NaN	19.3096	19.0369	19.1543	19.8077	3	590380	56260	0.0952944
Q15818	EIF3G_HUMAN	EIF3G	8	1	NaN	NaN	NaN	NaN	16.6871	0
Q7Z5N4	EIF3H_HUMAN	EIF3H	6	1	NaN	NaN	NaN	NaN	16.1688	0
Q9UMY4	EIF3I_HUMAN	EIF3I	30	4	19.117	19.2281	18.8864	19.1837	19.8629	4	565689	57202.5	0.10112
P10909	EIF3K_HUMAN	EIF3K	11	1	17.8236	NaN	NaN	17.8764	18.5384	2	236295	6115.13	0.0258793
O15067	EIF3L_HUMAN	EIF3L	17	3	19.5987	19.7526	19.3891	19.8202	20.3162	4	822386	105891	0.128761
P62879	EIF3M_HUMAN	EIF3M	8	1	NaN	NaN	NaN	NaN	18.2006	0
P61088	ELAV1_HUMAN	ELAVL1	37	4	NaN	18.6475	NaN	NaN	18.538	1	410634	NaN	NaN
P08123	ELOB_HUMAN	ELOB	47	5	20.3233	20.3441	20.3186	20.3053	20.6021	4	1311590	14672.4	0.0111867
P12110	ELOC_HUMAN	ELOC	15	2	19.4192	19.5676	19.7522	19.9249	20.1772	4	839150	128155	0.15272
Q96N76	ELP3_HUMAN	ELP3	13	2	NaN	NaN	NaN	NaN	18.7912	0
Q9UHD8	EMAL1_HUMAN	EML1	10	1	19.0005	19.636	19.7206	19.5831	20.5093	4	747150	151939	0.203358
Q08830	EMAL2_HUMAN	EML2	94	10	19.9823	20.4529	20.3648	20.3623	21.0886	4	1292290	175782	0.136023
Q96PD2	EMAL4_HUMAN	EML4	7	1	NaN	NaN	NaN	NaN	17.6971	0
Q08257	EMIL3_HUMAN	EMILIN3	31	4	19.7357	19.7583	19.9192	19.9558	19.6562	4	942064	72725.4	0.077198
P07686	ENAH_HUMAN	ENAH	8	1	NaN	18.1749	NaN	NaN	19.2532	1	295921	NaN	NaN
P50914	ENOA_HUMAN	ENO1	165	18	22.0544	22.3506	22.516	22.4709	22.8919	4	5378640	734932	0.136639
P09960	ENOB_HUMAN	ENO3	31	2	21.0101	21.4392	21.3915	21.3635	21.6291	4	2601080	331644	0.127502
Q15370	ENOF1_HUMAN	ENOSF1	10	1	NaN	19.8112	20.2248	NaN	NaN	2	1072640	215948	0.201323
P46776	ENPL_HUMAN	HSP90B1	301	30	20.6538	20.764	20.7982	20.7617	22.3949	4	1757910	75091.4	0.0427163
P26927	ENPP1_HUMAN	ENPP1	34	3	19.6587	19.3213	NaN	18.5932	20.2252	3	626067	217557	0.347498
Q13753	ENPP2_HUMAN	ENPP2	45	5	19.4209	19.7351	19.7792	19.8269	21.3127	4	851103	102192	0.12007
P10721	EPB41_HUMAN	EPB41	24	3	19.5884	20.1269	19.9634	19.8999	20.4754	4	983472	148009	0.150496
P00390	EPCAM_HUMAN	EPCAM	76	8	19.8257	19.6045	19.6724	18.3521	21.9571	4	724128	265541	0.366705
Q15366	EPCR_HUMAN	PROCR	47	3	23.8819	24.0494	23.6549	23.7397	17.9999	4	15009000	1824340	0.12155
P35268	EPHA2_HUMAN	EPHA2	64	8	19.4462	19.6739	19.586	19.2847	21.1622	4	744118	86354.7	0.11605
Q9Y4L1	EPHA4_HUMAN	EPHA4	34	3	NaN	NaN	NaN	NaN	17.9669	0
P09758	EPHB2_HUMAN	EPHB2	51	6	19.9956	19.0268	19.3393	20.065	18.7963	4	834915	278592	0.333677
O95834	EPHB4_HUMAN	EPHB4	32	4	19.5152	19.7776	19.9626	19.9702	19.8251	4	924256	130837	0.141559
P01780	EPN1_HUMAN	EPN1	6	1	NaN	19.0443	NaN	18.3513	18.9487	2	437529	145826	0.333295
Q9BUL8	EPS15_HUMAN	EPS15	33	4	18.661	18.9143	18.9488	18.9786	19.5603	4	482788	46442.6	0.0961966
Q9NY33	ERAP1_HUMAN	ERAP1	29	4	18.3723	18.9941	18.902	19.3042	19.6456	4	499673	126653	0.253472
P30153	ERBB2_HUMAN	ERBB2	8	1	19.2635	18.9721	19.5025	19.0776	NaN	4	609905	100637	0.165004
P61970	ERF1_HUMAN	ETF1	26	3	19.5732	19.4872	19.5987	19.4692	20.1028	4	758694	33404.3	0.0440287
P54289	ERF3A_HUMAN	GSPT1	25	3	19.8631	19.7641	20.2527	20.0358	20.3203	4	1042060	157949	0.151574
P62913	ERH_HUMAN	ERH	6	1	19.2416	NaN	18.8858	19.4185	18.9988	3	601661	109323	0.181703
P04062	ERP44_HUMAN	ERP44	100	10	19.5939	20.158	19.9319	19.7191	20.4165	4	956148	166813	0.174464
Q9UBS4	ESAM_HUMAN	ESAM	6	1	19.9232	20.1995	20.088	20.1356	NaN	4	1116190	89217.2	0.0799298
O15305	EST1_HUMAN	CES1	24	3	19.6351	19.6013	19.7585	19.4976	NaN	4	809191	60599.5	0.074889
P51148	ESTD_HUMAN	ESD	24	3	21.1342	21.214	21.3003	21.3322	21.2842	4	2489170	152604	0.0613073
Q9H2G2	EVA1A_HUMAN	EVA1A	9	1	NaN	19.6338	NaN	NaN	20.5045	1	813490	NaN	NaN
P11413	EXOC4_HUMAN	EXOC4	7	1	NaN	NaN	NaN	NaN	16.9514	0
Q16394	EXOS1_HUMAN	EXOSC1	8	1	NaN	NaN	NaN	NaN	16.9928	0
Q14CM0	EXT1_HUMAN	EXT1	105	12	19.8877	20.343	20.3652	20.4719	20.4318	4	1276260	211265	0.165534
P55209	EXT2_HUMAN	EXT2	92	12	20.3144	20.8765	20.913	20.9084	20.6285	4	1792880	326747	0.182247
P07602	EXTL2_HUMAN	EXTL2	9	1	NaN	NaN	NaN	NaN	18.3752	0
P13584	EZRI_HUMAN	EZR	132	15	20.3968	19.9943	20.0735	19.5565	21.8464	4	1074860	249991	0.232579
P26038	F10A1_HUMAN	ST13	57	8	20.079	20.2882	20.414	20.2838	20.536	4	1265430	119157	0.0941633
P50502	F13A_HUMAN	F13A1	40	3	22.9316	23.0786	23.1639	23.2075	23.342	4	8985760	741150	0.0824805
P09488	F16P1_HUMAN	FBP1	18	2	20.2334	20.419	20.6284	20.5709	19.7878	4	1453310	173459	0.119355
P35916	F8VWZ5_HUMAN	HLX	8	1	19.8669	18.8523	NaN	19.9569	20.4216	3	815719	298155	0.365512
Q16181	FA10_HUMAN	F10	85	8	22.7267	22.7098	22.7786	22.1435	22.3256	4	6407180	1191340	0.185938
Q86UN3	FA11_HUMAN	F11	18	2	NaN	20.1836	20.5094	20.6702	21.6525	3	1450710	241578	0.166524
Q02878	FA20C_HUMAN	FAM20C	50	5	19.6324	19.6652	20.1439	20.0799	19.331	4	977737	181076	0.185199
Q15113	FA7_HUMAN	F7	11	2	20.9103	20.5477	20.7826	20.588	21.7776	4	1720900	204638	0.118914
Q96P44	FA9_HUMAN	F9	8	1	22.2457	22.29	22.4652	22.5948	23.8769	4	5556480	628202	0.113058
P28074	FAAA_HUMAN	FAH	76	9	22.8325	22.921	22.9005	22.7746	19.5331	4	7603850	349585	0.0459747
Q96G03	FABP4_HUMAN	FABP4	19	2	20.2046	20.1659	20.3951	20.223	18.7369	4	1246890	90221.7	0.0723572
A6NGU5;P19440;P36268	FABP5_HUMAN	FABP5	25	3	20.4549	20.1793	20.4718	20.4337	20.9378	4	1373770	125244	0.0911681
P15090	FABPH_HUMAN	FABP3	7	1	NaN	NaN	19.2209	NaN	21.0143	1	611054	NaN	NaN
P25391	FABPL_HUMAN	FABP1	6	1	20.2501	20.4003	20.6125	20.6221	21.3519	4	1462000	178238	0.121914
P48643	FAH2A_HUMAN	FAHD2A	28	4	19.5575	19.2698	19.4292	19.4429	18.8381	4	705565	57180.1	0.0810416
Q16851	FAK1_HUMAN	PTK2	24	3	NaN	NaN	NaN	NaN	18.365	0
P28838	FAK2_HUMAN	PTK2B	33	4	NaN	NaN	NaN	NaN	17.7565	0
O75326	FAM3C_HUMAN	FAM3C	40	5	20.0208	20.3021	20.3363	20.1755	20.8319	4	1216160	117909	0.0969526
P22223	FAS_HUMAN	FASN	298	38	19.9612	20.0657	19.5049	19.1735	20.4725	4	863348	236534	0.273973
Q9HD42	FAT1_HUMAN	FAT1	109	14	20.1187	20.1779	20.291	20.3025	19.9466	4	1225190	75237.4	0.0614087
P01700	FAT2_HUMAN	FAT2	182	22	19.0709	19.2259	18.2359	NaN	20.8807	3	490853	160793	0.32758
P26639	FAT3_HUMAN	FAT3	7	1	NaN	NaN	NaN	NaN	18.8539	0
P48059	FAT4_HUMAN	FAT4	283	33	20.2746	20.4337	20.5333	20.5686	20.0724	4	1439330	128135	0.0890242
P62917	FBLL1_HUMAN;FBRL_HUMAN	FBL;FBLL1	9	1	NaN	NaN	NaN	NaN	17.047	0
P27797	FBLN1_HUMAN	FBLN1	215	12	23.5312	23.1226	23.1432	23.4879	23.4991	4	10570800	1592460	0.150647
P11940	FBLN2_HUMAN	FBLN2	107	10	19.2377	18.8439	18.9649	18.7891	20.3012	4	513342	74096.4	0.144341
P07357	FBLN3_HUMAN	EFEMP1	135	13	21.4188	21.3016	21.4387	21.4185	21.0123	4	2758390	117176	0.0424798
P47755	FBLN4_HUMAN	EFEMP2	27	3	18.7082	19.0439	18.6109	18.8136	20.1331	4	457464	60600.4	0.13247
Q16787	FBLN5_HUMAN	FBLN5	27	3	19.6982	19.9065	19.8557	20.0225	19.288	4	961800	88740.2	0.0922648
P19823	FBLN7_HUMAN	FBLN7	32	5	19.9876	20.0876	20.0916	19.7567	21.049	4	1039230	108394	0.104302
O75830;P30740;P50452;P50453	FBN1_HUMAN	FBN1	177	17	19.45	19.276	19.6285	19.4232	20.0765	4	716140	72333.3	0.101004
P22891	FBN2_HUMAN	FBN2	175	20	19.9595	19.7981	19.9332	19.8784	19.4867	4	974046	47624.6	0.0488935
P14174	FBX7_HUMAN	FBXO7	14	2	18.6837	19.6302	19.4724	19.3211	19.8517	4	653731	167774	0.256641
Q9H7Y0	FCG3A_HUMAN	FCGR3A	45	5	21.0644	21.0903	21.0905	20.9325	NaN	4	2164940	110670	0.0511194
P68402	FCGBP_HUMAN	FCGBP	53	6	20.4891	20.4633	20.35	20.4616	19.4015	4	1424470	60023.9	0.0421378
Q8N149	FERM1_HUMAN	FERMT1	14	2	NaN	NaN	NaN	NaN	17.2183	0
Q14517	FERM2_HUMAN	FERMT2	39	5	18.6804	18.6413	19.0627	19.4908	19.1468	4	528321	152514	0.288678
P18206	FETUA_HUMAN	AHSG	181	10	25.7329	25.6306	25.7995	25.7561	26.0327	4	55696600	2728000	0.0489795
P12814	FETUB_HUMAN	FETUB	88	9	23.1462	23.039	23.1445	23.0475	NaN	4	8960800	366649	0.040917
P29401	FGFP1_HUMAN	FGFBP1	52	5	NaN	NaN	NaN	NaN	20.3135	0
P05120	FGFR1_HUMAN	FGFR1	25	3	19.7674	19.8013	19.7733	19.8139	19.6525	4	905961	13970.6	0.0154207
Q07020	FGFR4_HUMAN	FGFR4	8	1	18.4562	19.148	18.6864	18.9675	NaN	4	468757	97664.1	0.208347
Q99832	FGL1_HUMAN	FGL1	16	2	20.3336	20.1975	20.5253	20.2481	21.2583	4	1319580	135610	0.102768
Q9UKZ9	FHL1_HUMAN	FHL1	45	5	19.8983	20.0785	19.9591	19.9931	21.4851	4	1036820	54380.3	0.052449
Q92520	FHOD1_HUMAN	FHOD1	31	4	NaN	NaN	NaN	19.0566	19.5655	1	545263	NaN	NaN
Q9BPX5	FIBA_HUMAN	FGA	101	12	20.995	21.1227	21.2356	21.1877	20.5977	4	2307740	163984	0.0710583
P61020	FIBB_HUMAN	FGB	19	2	20.2846	NaN	19.0108	18.9877	18.9834	3	775100	434870	0.56105
P20340	FIBG_HUMAN	FGG	85	8	21.068	20.9625	21.0218	21.1489	20.5902	4	2173980	119108	0.0547878
Q16401	FILA2_HUMAN	FLG2	20	3	19.9323	18.0254	18.4776	18.9829	17.9129	4	537606	325474	0.605413
Q12884	FINC_HUMAN	FN1	816	65	22.9835	22.8659	22.9574	22.7327	21.6684	4	7762970	597266	0.0769379
P31153	FJX1_HUMAN	FJX1	21	2	NaN	NaN	NaN	NaN	18.2386	0
Q04721	FKB10_HUMAN	FKBP10	18	2	NaN	NaN	NaN	NaN	17.2813	0
O75829	FKB1A_HUMAN	FKBP1A	15	2	NaN	18.6978	18.8783	NaN	22.0678	2	453527	40068.4	0.0883484
Q96CN7	FKBP4_HUMAN	FKBP4	69	8	19.6649	19.7488	19.9121	19.8836	19.5536	4	916529	73079.8	0.0797354
P23471	FKBP9_HUMAN	FKBP9	21	3	20.4212	20.5678	20.7022	20.5494	20.9475	4	1549750	123672	0.0798015
P30050	FLII_HUMAN	FLII	11	2	NaN	18.567	18.2133	NaN	19.7239	2	346131	59713.9	0.172518
P25786	FLNA_HUMAN	FLNA	974	90	20.4171	20.7561	20.7856	20.7657	21.897	4	1690330	194090	0.114824
P25325	FLNB_HUMAN	FLNB	275	34	19.3944	19.6515	19.5215	19.6574	20.315	4	773049	65611.5	0.0848736
P49746	FLNC_HUMAN	FLNC	97	11	18.663	18.9736	19.2708	18.9972	19.6432	4	521422	88887.4	0.170471
P06703	FLOT1_HUMAN	FLOT1	7	1	NaN	NaN	NaN	NaN	18.6954	0				+
P21980	FLOT2_HUMAN	FLOT2	22	3	NaN	19.2251	19.3261	18.9954	17.581	3	597572	68591.7	0.114784	+
Q9BXN1	FMNL2_HUMAN	FMNL2	15	2	NaN	NaN	NaN	NaN	17.6215	0
P67936	FMOD_HUMAN	FMOD	50	5	22.1193	22.3762	22.3946	22.4873	22.8522	4	5348240	561738	0.105032
P10644	FNTA_HUMAN	FNTA	8	1	NaN	19.0501	NaN	19.1316	19.0731	2	558576	22300.7	0.0399242
Q8WZ75	FOH1B_HUMAN;FOLH1_HUMAN;NALD2_HUMAN	FOLH1;FOLH1B;NAALAD2	8	1	18.9012	NaN	NaN	18.7832	NaN	2	470366	27198.2	0.0578236
P40227	FPPS_HUMAN	FDPS	8	1	NaN	NaN	NaN	NaN	19.782	0
P05067	FPRP_HUMAN	PTGFRN	274	28	21.0138	20.6949	20.6555	19.5149	22.7966	4	1553870	575942	0.37065
O43657	FRAS1_HUMAN	FRAS1	29	4	19.1701	NaN	18.4755	NaN	17.554	2	477193	159389	0.334014
P21281	FREM2_HUMAN	FREM2	22	3	NaN	NaN	18.3488	NaN	19.537	1	333834	NaN	NaN
P02794	FRIH_HUMAN	FTH1	67	7	19.7126	19.8852	20.4744	20.4756	21.1959	4	1185630	317051	0.267411
Q6ZMI3	FRIL_HUMAN	FTL	31	4	18.7949	18.1163	NaN	NaN	19.9143	2	369481	120668	0.326588
O43776	FRPD4_HUMAN	FRMPD4	9	1	20.7925	19.8986	20.0676	20.2085	18.3331	4	1276020	372579	0.291984
Q15819	FSCN1_HUMAN	FSCN1	121	14	19.8881	20.0021	19.8579	19.9613	20.6981	4	997851	45763.1	0.0458617
Q9GZM7	FST_HUMAN	FST	98	9	20.1667	19.4721	19.1868	19.6698	21.5409	4	833774	248556	0.29811
Q8WUX1	FSTL1_HUMAN	FSTL1	33	4	19.7126	19.7575	19.9529	20.0169	19.1106	4	955336	97800.6	0.102373
P54709	FTCD_HUMAN	FTCD	11	1	19.2477	19.95	20.0592	19.6673	19.1393	4	890106	208922	0.234716
Q96CX2	FUBP2_HUMAN	KHSRP	8	1	NaN	NaN	NaN	NaN	17.451	0
P61106	FUCO_HUMAN	FUCA1	35	5	21.4373	21.6996	21.6536	21.4905	18.4844	4	3122770	272321	0.0872049
Q9Y5P6	FUCO2_HUMAN	FUCA2	103	12	20.1654	20.0712	20.1993	19.8146	21.1399	4	1100900	126775	0.115156
P61158	FUMH_HUMAN	FH	23	3	19.7845	20.1768	20.1446	20.3209	19.454	4	1139330	170676	0.149804
Q14520	FUT11_HUMAN	FUT11	9	1	19.5944	20.1505	19.9372	20.421	20.3172	4	1090830	258474	0.236952
Q8TE54	G3BP1_HUMAN	G3BP1	10	1	NaN	NaN	NaN	NaN	17.5928	0
P32754	G3P_HUMAN	GAPDH	200	15	21.7373	21.8545	21.7072	21.5718	22.3196	4	3457250	277020	0.0801273
O60462	G6PD_HUMAN	G6PD	64	10	20.1674	20.3851	20.3017	20.2734	20.5772	4	1276700	79077.9	0.0619391
Q96FW1	G6PE_HUMAN	H6PD	26	4	19.4	20.0468	20.0051	19.9912	19.9521	4	967362	184524	0.190749
Q8WZ42	G6PI_HUMAN	GPI	22	2	NaN	NaN	NaN	NaN	18.3753	0
Q9NX62	G8JL96_HUMAN	PTPRS	8	1	NaN	19.5231	NaN	NaN	19.0149	1	753415	NaN	NaN
Q01813	GAK1A_HUMAN	GASK1A	13	2	19.8967	20.0874	19.7646	20.064	16.8832	4	1019250	105321	0.103332
Q6UXH8	GALE_HUMAN	GALE	37	5	20.4724	20.3997	20.3461	20.5518	20.6439	4	1427020	88826.3	0.062246
P21589	GALK1_HUMAN	GALK1	15	2	21.8292	22.0099	22.1188	22.214	21.216	4	4342130	487206	0.112204
Q9Y624	GALK2_HUMAN	GALK2	6	1	19.4581	19.7578	19.7484	19.8729	20.1576	4	861922	101143	0.117346
Q9H9Q2	GALM_HUMAN	GALM	6	1	19.7287	20.2646	20.1854	20.2079	19.7854	4	1132990	178378	0.15744
P30101	GALNS_HUMAN	GALNS	8	1	19.166	19.5	19.2308	18.9097	NaN	4	609345	102616	0.168403
P43487	GALT_HUMAN	GALT	27	3	19.6225	18.7722	18.5008	19.1671	19.0457	4	553618	191572	0.346037
P49591	GALT1_HUMAN	GALNT1	9	1	NaN	17.378	NaN	NaN	18.2211	1	170329	NaN	NaN
Q13751	GALT2_HUMAN	GALNT2	29	4	19.6481	19.9449	20.1336	20.0191	19.8522	4	1010930	138971	0.137467
Q8WUM4	GALT5_HUMAN	GALNT5	37	5	19.7556	19.9337	19.7924	19.924	20.3978	4	947354	59414.3	0.062716
P42785	GALT7_HUMAN	GALNT7	26	4	19.0136	19.5793	19.1413	19.5087	19.494	4	659203	124330	0.188607
P22392	GANAB_HUMAN	GANAB	340	33	19.8995	20.2033	20.1666	19.9603	22.3744	4	1095570	113432	0.103537
P55001	GAPD1_HUMAN	GAPVD1	10	1	NaN	NaN	NaN	NaN	18.7346	0
Q9BUF5	GAPR1_HUMAN	GLIPR2	12	2	20.8532	20.5138	20.8575	20.3973	18.905	4	1668100	268659	0.161056
Q15262	GARS_HUMAN	GARS1	93	10	19.6467	19.6004	19.6216	19.7011	19.7129	4	818690	24824.1	0.0303217
P07954	GBA3_HUMAN	GBA3	6	1	NaN	NaN	NaN	NaN	17.8347	0
P30613	GBB1_HUMAN	GNB1	14	2	20.856	20.5167	20.6603	20.2482	21.0287	4	1575170	273996	0.173947
P50281	GBB2_HUMAN	GNB2	51	6	20.4738	20.3883	20.4638	20.0006	21.3154	4	1330940	191629	0.143981
Q96C23	GBB3_HUMAN	GNB3	10	1	18.2394	18.5528	18.4196	NaN	18.3312	3	348220	37601.6	0.107982
Q02809	GBB4_HUMAN	GNB4	8	1	18.5511	NaN	18.8415	18.7562	18.6324	3	432203	43785.2	0.101307
P17980	GBG12_HUMAN	GNG12	39	5	20.003	20.0011	19.8396	18.8787	21.5949	4	880104	270581	0.307442
Q15084	GBG5_HUMAN	GNG5	9	1	21.1664	20.8183	21.046	21.0284	20.5569	4	2126600	208338	0.0979679
Q8IUL8	GBP4_HUMAN;GBP6_HUMAN	GBP4;GBP6	8	1	19.2509	20.1988	19.4575	19.7006	19.4481	4	849839	253635	0.29845
O95832	GBRL2_HUMAN	GABARAPL2	6	1	18.2501	17.6164	17.452	NaN	18.9109	3	230667	71058.7	0.308057
P98161	GCN1_HUMAN	GCN1	36	5	21.8406	21.47	21.6953	20.6795	24.3434	4	2933880	906113	0.308844
Q8NCC3	GCP2_HUMAN	TUBGCP2	5	1	NaN	NaN	NaN	NaN	17.5014	0
P22314	GCYA1_HUMAN	GUCY1A1	20	3	NaN	18.464	18.5125	18.2163	19.415	3	346687	37021.4	0.106786
O15144	GCYB1_HUMAN	GUCY1B1	20	3	NaN	18.2132	18.6203	18.9871	19.1537	3	408829	107992	0.264149
P61160	GDE_HUMAN	AGL	42	5	19.0281	19.5948	19.5111	19.5872	19.2301	4	715313	122139	0.170749
P19801	GDF1_HUMAN	GDF1	6	1	19.6238	19.6904	19.6667	19.6226	NaN	4	823374	19101.6	0.0231992
Q9H2A2	GDF15_HUMAN	GDF15	12	2	NaN	20.0388	19.6987	NaN	20.1714	2	964042	159927	0.165892
P53990	GDF8_HUMAN	MSTN	34	4	18.2175	18.2738	18.0379	NaN	19.7842	3	296949	24847	0.0836745
Q86U17	GDIA_HUMAN	GDI1	20	2	19.7176	19.774	19.7197	19.8267	19.9118	4	888002	32153.6	0.0362089
P08581	GDIB_HUMAN	GDI2	131	15	20.373	20.8365	20.7613	20.7531	21.0457	4	1693740	228843	0.135111
P62888	GDIR1_HUMAN	ARHGDIA	53	5	19.9949	19.9296	19.9642	20.0048	20.3688	4	1029600	24100.4	0.0234076
P07910	GDIR2_HUMAN	ARHGDIB	25	3	19.8078	20.2004	19.9927	19.8251	21.1601	4	1023700	133428	0.130339
P0DJI8;P0DJI9	GDN_HUMAN	SERPINE2	26	4	18.2346	19.4151	18.7684	19.3939	19.0226	4	535737	191271	0.357024
P24043	GDS1_HUMAN	RAP1GDS1	8	1	NaN	NaN	NaN	NaN	17.0084	0
P07911	GELS_HUMAN	GSN	282	22	21.9678	21.8581	21.9576	22.0262	24.7034	4	4061790	194330	0.0478434
P80188	GET3_HUMAN	GET3	8	1	NaN	19.6164	NaN	NaN	19.3957	1	803737	NaN	NaN
P61353	GFPT1_HUMAN	GFPT1	82	10	18.9965	19.3951	19.5094	19.3591	19.1159	4	657802	95233.8	0.144776
H3BQQ0	GGA1_HUMAN;GGA2_HUMAN;GGA3_HUMAN	GGA1;GGA2;GGA3	6	1	NaN	18.1351	NaN	17.9849	18.5297	2	273641	20122.5	0.073536
Q99435	GGH_HUMAN	GGH	128	11	22.6852	22.8374	22.835	22.6334	18.9976	4	7056800	507596	0.07193
Q8WWQ8	GGT1_HUMAN;GGT2_HUMAN;GGT3_HUMAN	GGT1;GGT2;GGT3P	26	3	20.1739	20.3134	20.3597	20.1449	NaN	4	1247680	90572.9	0.072593
Q92747	GGT5_HUMAN	GGT5	11	1	20.1957	18.661	20.4747	20.1993	NaN	4	1069120	452638	0.423376
Q96AP7	GHR_HUMAN	GHR	23	3	20.2746	20.4764	20.3526	20.3974	NaN	4	1361800	79681	0.0585115
P61019	GIPC1_HUMAN	GIPC1	9	1	NaN	NaN	NaN	NaN	18.1245	0
P10619	GL8D1_HUMAN	GLT8D1	18	2	NaN	NaN	19.7932	NaN	19.4054	1	908536	NaN	NaN
P01130	GLB1L_HUMAN	GLB1L	25	3	19.3129	NaN	NaN	19.1171	20.2336	2	609944	58422	0.0957825
P47756	GLCE_HUMAN	GLCE	5	1	NaN	18.2386	17.2984	NaN	18.0564	2	235240	104727	0.445192
Q96KG7	GLCM_HUMAN	GBA	68	9	20.2442	20.2547	20.3036	20.3526	20.9403	4	1281480	44504.1	0.0347287
O15511	GLCNE_HUMAN	GNE	17	2	19.4159	20.0703	20.1268	20.1214	19.723	4	1021490	215580	0.211046
O75503	GLDN_HUMAN	GLDN	6	1	20.1391	20.4251	20.1217	19.9852	NaN	4	1185340	157260	0.132671
P23229	GLGB_HUMAN	GBE1	21	3	19.4428	19.5694	19.9185	19.2826	18.8732	4	779840	151971	0.194875
P03971	GLOD4_HUMAN	GLOD4	24	4	20.8132	20.9566	21.0325	20.9166	20.6101	4	2000420	125803	0.0628881
A0A0G2JMB2	GLRX3_HUMAN	GLRX3	22	3	20.3462	20.351	20.481	20.5424	20.2443	4	1415230	96055.7	0.067873
Q9Y287	GLT10_HUMAN	GALNT10	25	4	NaN	19.9388	20.1776	20.0078	19.3897	3	1081750	93530.2	0.0864623
Q9BTY2	GLU2B_HUMAN	PRKCSH	23	3	NaN	NaN	NaN	NaN	20.5767	0
O43813	GLYC_HUMAN	SHMT1	43	5	19.7787	20.0272	20.1857	20.1994	19.8693	4	1091150	141749	0.129908
P01034	GMFG_HUMAN	GMFG	6	1	20.2526	NaN	20.2035	19.6386	20.936	3	1090950	238823	0.218914
Q14697	GMPPA_HUMAN	GMPPA	21	3	18.9131	18.8762	18.9148	19.0077	19.639	4	499027	19651.7	0.0393801
P29692	GMPPB_HUMAN	GMPPB	18	2	20.1245	20.3057	20.0645	20.1572	20.6439	4	1176240	85376.9	0.0725847
Q6E0U4	GMPR2_HUMAN	GMPR2	16	2	NaN	NaN	NaN	NaN	17.2244	0
P09417	GNA1_HUMAN	GNPNAT1	24	3	19.5343	19.4753	19.2311	19.3736	19.1094	4	695701	62889.8	0.0903978
P34896	GNA11_HUMAN	GNA11	21	3	NaN	18.461	19.0707	NaN	19.3247	2	455736	134200	0.29447
O60234	GNA13_HUMAN	GNA13	18	3	18.7475	NaN	NaN	NaN	19.8048	1	440096	NaN	NaN
Q495W5	GNAI1_HUMAN	GNAI1	17	2	NaN	NaN	18.2259	NaN	20.2685	1	306576	NaN	NaN
Q9NRY6	GNAI2_HUMAN	GNAI2	93	10	20.0157	20.0012	20.0898	19.5232	20.9316	4	994743	163451	0.164315
Q8N2S1	GNAI3_HUMAN	GNAI3	15	2	19.7058	19.2101	19.6593	18.1961	20.4898	4	647490	256861	0.396703
P48960	GNAS1_HUMAN;GNAS2_HUMAN	GNAS	6	1	NaN	NaN	NaN	NaN	17.8196	0
P50991	GNPI1_HUMAN;GNPI2_HUMAN	GNPDA1;GNPDA2	7	1	19.1286	18.6957	NaN	18.7883	18.3658	3	483491	78924	0.163238
P28482	GNPTG_HUMAN	GNPTG	10	1	19.7843	19.6978	19.7092	19.7537	21.4478	4	873646	24353.9	0.0278761
Q13098	GNS_HUMAN	GNS	32	4	19.2299	19.1691	19.0491	18.5437	19.4892	4	532228	104471	0.196291
P46781	GOLM1_HUMAN	GOLM1	71	8	20.8708	20.5843	20.689	20.7855	20.9879	4	1746840	148860	0.0852167
Q13885;Q9BVA1	GOLP3_HUMAN	GOLPH3	21	2	19.1698	19.3852	19.044	19.1834	17.9243	4	602610	60046.8	0.0996446
Q5R3I4	GPC1_HUMAN	GPC1	194	18	21.3407	20.8611	20.886	19.1285	23.1378	4	1767860	868618	0.491338
Q9BY67	GPC4_HUMAN;GPC6_HUMAN	GPC4;GPC6	9	1	18.2742	NaN	18.4679	NaN	18.0818	2	339790	32219	0.0948202
P54577	GPD1L_HUMAN	GPD1L	11	2	19.5878	19.5186	19.8993	19.9543	19.6335	4	883202	133016	0.150607
Q86SR1	GPDA_HUMAN	GPD1	33	4	19.3769	19.9302	19.9301	19.9287	19.9246	4	919218	158923	0.172889
P49368	GPNMB_HUMAN	GPNMB	16	2	20.5803	20.2561	20.4519	20.3755	NaN	4	1403670	132501	0.0943965
Q3LXA3	GPX3_HUMAN	GPX3	70	6	23.0201	23.3367	23.2642	23.1395	20.9338	4	9603830	919857	0.0957802
Q9NZZ3	GRB2_HUMAN	GRB2	25	3	19.8224	19.23	19.3423	NaN	20.5245	3	735573	167745	0.228046
P06493	GRHPR_HUMAN	GRHPR	20	3	NaN	20.7585	20.6823	20.505	20.1193	3	1648230	145981	0.0885686
P17987	GRN_HUMAN	GRN	164	13	19.6261	19.4314	19.2958	19.3029	21.9861	4	701649	77399.7	0.110311
P62266	GRP2_HUMAN	RASGRP2	56	6	19.0951	19.4063	19.3393	19.2425	20.2697	4	634602	58376.2	0.0919886
P13693	GRP75_HUMAN	HSPA9	22	3	NaN	17.947	18.2302	NaN	20.8073	2	280093	38757.4	0.138373
P15311	GRWD1_HUMAN	GRWD1	15	2	NaN	NaN	NaN	NaN	18.4275	0
Q7L5Y1	GSH0_HUMAN	GCLM	48	4	19.1087	19.2671	19.0082	19.7698	18.8957	4	654359	165341	0.252676
A0A140T9M0;A0A140T9U0;A0A140T9W2;Q53YP1	GSH1_HUMAN	GCLC	40	5	19.9696	20.4771	20.4064	20.4961	20.2576	4	1338740	211491	0.157978
Q9Y4K0	GSHB_HUMAN	GSS	80	10	20.7593	20.8785	20.8935	20.7129	19.6625	4	1842290	112960	0.0613148
P04632	GSHR_HUMAN	GSR	6	1	19.9531	20.2337	20.4023	20.5884	20.2554	4	1302610	237707	0.182485
P36269	GSLG1_HUMAN	GLG1	213	25	19.9674	20.0332	19.7185	19.3649	22.7229	4	909007	180015	0.198035
Q9Y289	GSTA1_HUMAN;GSTA2_HUMAN	GSTA1;GSTA2	8	1	21.5662	21.8988	21.999	21.8408	21.442	4	3740730	460430	0.123086
P13796	GSTA3_HUMAN	GSTA3	30	4	22.5951	23.0641	23.1829	23.2256	22.2305	4	8609060	1577530	0.183241
Q86UD1	GSTA5_HUMAN	GSTA5	28	3	21.0646	21.3958	21.611	21.4218	21.3373	4	2741180	415704	0.151652
P31323	GSTM1_HUMAN	GSTM1	21	2	19.9326	20.5937	20.1136	20.3571	19.9796	4	1265160	254089	0.200835
P78536	GSTM2_HUMAN	GSTM2	18	2	20.3543	20.6303	20.7856	20.619	20.4336	4	1595390	192364	0.120575
P00326	GSTO1_HUMAN	GSTO1	84	11	22.0857	22.1707	22.233	22.0351	19.2136	4	4599800	281016	0.0610931
Q8IWV2	GSTP1_HUMAN	GSTP1	65	7	20.9658	20.9508	20.9695	20.8657	21.316	4	2009700	66985.4	0.0333311
P51857	GSTT1_HUMAN	GSTT1	12	1	21.0938	21.3986	21.4179	21.123	20.6624	4	2522050	302522	0.119951
P28065	GT251_HUMAN	COLGALT1	68	9	21.6469	19.4862	19.8317	NaN	21.303	3	1650400	1417950	0.859155
P42224	GTR1_HUMAN	SLC2A1	59	6	20.6567	20.9426	20.6853	19.9444	22.7702	4	1590880	421001	0.264633
Q9H4A4	GUAA_HUMAN	GMPS	49	6	19.7451	19.7124	19.8077	19.8611	19.9983	4	901965	41488.8	0.0459983
Q7LBR1	GXLT1_HUMAN	GXYLT1	4	1	17.8829	NaN	NaN	NaN	18.8594	1	241704	NaN	NaN
P16144	H0Y8H4_HUMAN	NEDD4	13	2	18.7757	18.313	19.3776	NaN	20.2711	3	485194	180513	0.372042
P50990	H11_HUMAN;H12_HUMAN;H13_HUMAN;H14_HUMAN;H1T_HUMAN	H1-1;H1-2;H1-3;H1-4;H1-6	6	1	20.641	20.7355	20.9739	20.8018	21.0198	4	1817140	179912	0.0990085
P12268	H2A1B_HUMAN;H2A1C_HUMAN;H2A1D_HUMAN;H2A1H_HUMAN;H2A1J_HUMAN;H2A1_HUMAN;H2A2A_HUMAN;H2A2C_HUMAN;H2A3_HUMAN;H2AJ_HUMAN	H2AC11;H2AC12;H2AC14;H2AC18;H2AC20;H2AC4;H2AC6;H2AC7;H2AJ;H2AW	31	3	22.5212	22.5418	22.5221	22.04	25.1362	4	5615200	869521	0.154851
P06753	H2A2B_HUMAN	H2AC21	16	2	NaN	NaN	NaN	NaN	21.3479	0
P62140	H2AV_HUMAN;H2AZ_HUMAN	H2AZ1;H2AZ2	10	1	19.2444	19.0562	NaN	NaN	21.8308	2	583089	53702.2	0.0920996
Q13838	H2AY_HUMAN	MACROH2A1	58	5	NaN	NaN	NaN	NaN	19.179	0
O43451	H2B1B_HUMAN;H2B1J_HUMAN;H2B1O_HUMAN;H2B2E_HUMAN;H2B3B_HUMAN	H2BC11;H2BC17;H2BC21;H2BC3;H2BU1	19	2	20.6893	20.1568	20.6411	NaN	22.0192	3	1498370	286604	0.191278
P78371	H2B1C_HUMAN;H2B1D_HUMAN;H2B1H_HUMAN;H2B1K_HUMAN;H2B1L_HUMAN;H2B1M_HUMAN;H2B1N_HUMAN;H2B2F_HUMAN;H2BFS_HUMAN	H2BC12;H2BC13;H2BC14;H2BC15;H2BC18;H2BC4;H2BC5;H2BC9;H2BS1	57	5	20.8373	21.1397	21.0066	20.4749	23.7545	4	1936980	366225	0.18907
P52907	H31T_HUMAN;H31_HUMAN;H32_HUMAN;H33_HUMAN	H3-3A;H3-4;H3C1;H3C15	9	1	21.2271	20.8847	20.937	20.5151	22.4894	4	1974190	391454	0.198286
B1ALD9	H3BQQ0_HUMAN	C16orf46	11	1	20.1473	19.8271	20.0733	20.2884	19.6377	4	1118810	145852	0.130363
P14868	H3BR70_HUMAN;H3BTN5_HUMAN	PKM	16	2	21.6273	21.5928	21.7664	21.749	21.2391	4	3373560	202246	0.0599503
Q12756	H3PS2_HUMAN	H3-2	29	4	21.2387	21.3286	21.2519	20.5208	23.9599	4	2277400	520094	0.228372
P15170	H4_HUMAN	H4C1	105	9	21.31	21.529	21.3874	20.7433	24.0613	4	2531100	546690	0.215989
P62736	H6ST2_HUMAN	HS6ST2	19	2	NaN	18.7416	NaN	NaN	19.3621	1	438325	NaN	NaN
P16083	H7BZJ3_HUMAN	PDIA3	11	1	20.316	20.8865	21.0178	21.0621	21.0193	4	1889130	403419	0.213547
Q12905	H9KV75_HUMAN	ACTN1	17	2	19.7285	19.508	19.745	19.6276	20.5969	4	825747	61431.4	0.0743949
Q53RD9	HABP2_HUMAN	HABP2	38	3	19.8749	20.2163	20.212	20.3092	21.3028	4	1173350	146545	0.124894
Q14623	HARS1_HUMAN	HARS1	61	8	19.678	19.9371	19.9733	19.9963	20.0751	4	979484	95348.3	0.0973454
Q13642	HBA_HUMAN	HBA1	93	5	24.6746	24.8015	24.7407	24.6882	22.3355	4	27772000	1119260	0.0403017
P80723	HBB_HUMAN	HBB	234	11	25.8859	25.9184	25.3647	25.8235	21.458	4	57002600	9348530	0.164002
Q96F85	HBD_HUMAN	HBD	60	6	23.5261	23.5421	23.6305	23.4194	19.1238	4	12124800	724316	0.0597384
Q9NR71	HBG1_HUMAN	HBG1	48	5	20.7659	19.3597	19.3226	19.2468	23.2404	4	933373	566813	0.607274
Q96NU7	HEBP1_HUMAN	HEBP1	17	1	19.386	19.7131	19.8979	19.8282	19.5121	4	863093	128116	0.148439
P28827	HEBP2_HUMAN	HEBP2	6	1	18.8956	18.4702	19.249	18.7742	18.7405	4	480548	108288	0.225342
O15230	HEG1_HUMAN	HEG1	20	2	19.708	19.2463	19.7776	19.3717	18.8722	4	763868	134458	0.176023
P18124	HEM2_HUMAN	ALAD	17	2	19.3454	18.8531	18.7018	19.0265	18.6614	4	525016	103878	0.197857
Q969X1	HEM6_HUMAN	CPOX	12	2	19.0128	18.9946	18.1993	19.2179	19.421	4	490507	132464	0.270056
P17612	HEMO_HUMAN	HPX	441	30	29.1009	29.1527	29.1491	29.0699	16.5444	4	582855000	16060200	0.0275543
P52565	HEP2_HUMAN	SERPIND1	40	6	20.4272	20.6394	20.622	20.5738	NaN	4	1554430	101072	0.0650221
Q9NTK5	HEPH_HUMAN	HEPH	16	2	19.4014	20.0096	20.0424	19.9219	19.865	4	955308	178985	0.187358
O76074	HEPS_HUMAN	HPN	14	2	NaN	18.6975	NaN	NaN	18.9572	1	425103	NaN	NaN
P60866	HEXA_HUMAN	HEXA	5	1	20.6958	20.5876	20.7622	20.869	20.8362	4	1741920	142398	0.0817479
P52566	HEXB_HUMAN	HEXB	95	12	20.3983	20.3389	20.4097	20.143	21.7648	4	1314760	108639	0.0826305
Q9Y223	HGD_HUMAN	HGD	56	6	21.0425	20.6562	20.6254	20.7269	20.1719	4	1791350	250588	0.139888
P0DP23;P0DP24;P0DP25	HGFA_HUMAN	HGFAC	133	11	21.5937	21.5328	21.6422	21.668	20.3501	4	3201040	131148	0.0409705
O14672	HGFL_HUMAN	MST1	65	6	20.2471	20.3272	20.2498	20.4514	22.4032	4	1310140	88788.7	0.0677703
P62241	HIKES_HUMAN	HIKESHI	9	1	NaN	NaN	NaN	NaN	18.2804	0
Q9UFP1	HINT1_HUMAN	HINT1	13	2	NaN	NaN	NaN	NaN	20.7706	0
P39060	HLAC_HUMAN	HLA-C	24	3	19.505	19.7293	20.3389	18.4823	21.0403	4	826405	395896	0.479058
Q99519	HLAG_HUMAN	HLA-G	6	1	19.2519	19.8713	19.8533	20.0566	20.1515	4	905287	198270	0.219014
P09874	HMCN1_HUMAN	HMCN1	142	18	20.4679	20.4763	20.5339	20.556	19.7329	4	1492200	44680.4	0.0299427
Q13185	HMCN2_HUMAN	HMCN2	61	7	19.7632	19.5473	19.8195	19.8543	19.8171	4	882280	81002.8	0.0918108
Q86VP6	HMCS1_HUMAN	HMGCS1	51	7	20.619	20.8475	20.7211	20.7873	20.6393	4	1758840	118172	0.0671876
Q06481	HMGB2_HUMAN	HMGB2	17	2	NaN	NaN	NaN	NaN	18.2995	0
Q10471	HMHA1_HUMAN	ARHGAP45	14	2	NaN	NaN	NaN	NaN	17.321	0
P53396	HNMT_HUMAN	HNMT	7	1	NaN	19.3758	18.9501	NaN	19.0641	2	593360	122914	0.20715
P42677	HNRH1_HUMAN	HNRNPH1	22	3	19.0563	18.8315	18.4967	NaN	19.6098	3	460511	87781.5	0.190618
O60701	HNRH3_HUMAN	HNRNPH3	18	2	NaN	NaN	NaN	NaN	18.5164	0
Q9ULV4	HNRL2_HUMAN	HNRNPUL2	8	1	NaN	NaN	NaN	NaN	19.2523	0
O94979	HNRPC_HUMAN	HNRNPC	22	3	20.385	20.5766	19.5603	19.5733	21.0323	4	1121550	406188	0.362166
Q9H5V8	HNRPD_HUMAN	HNRNPD	28	5	19.2132	19.6944	18.7876	18.6332	20.5923	4	578830	199277	0.344276
P83881;Q969Q0	HNRPF_HUMAN	HNRNPF	40	4	19.9817	19.9118	19.9922	19.5703	19.9879	4	960790	124084	0.129148
Q99715	HNRPK_HUMAN	HNRNPK	88	10	19.5952	19.6849	19.6009	19.3814	20.8206	4	778246	67651.6	0.0869284
Q99497	HNRPL_HUMAN	HNRNPL	19	3	19.3378	NaN	18.7061	18.5104	20.1291	3	487890	153715	0.31506
P15289	HNRPM_HUMAN	HNRNPM	130	16	19.9495	20.0981	19.5652	19.3344	20.0187	4	892908	211696	0.237086
P58335	HNRPQ_HUMAN	SYNCRIP	41	5	18.9316	19.1713	19.2675	19.1229	20.1425	4	573100	54812.2	0.0956415
O75191	HNRPR_HUMAN	HNRNPR	7	1	NaN	17.6393	NaN	NaN	17.9449	1	204150	NaN	NaN
Q16658	HNRPU_HUMAN	HNRNPU	36	4	19.8754	19.9849	19.2388	18.8803	20.7876	4	775162	266997	0.344441
O15427	HORN_HUMAN	HRNR	32	4	19.1702	16.5019	19.3402	18.5345	17.4301	4	431547	255884	0.592947
Q9NP79	HPBP1_HUMAN	HSPBP1	15	2	18.1823	18.757	18.5216	18.4448	19.1887	4	368401	60000	0.162866
P22102	HPCA_HUMAN;HPCL1_HUMAN;NCALD_HUMAN	HPCA;HPCAL1;NCALD	20	2	NaN	18.9447	18.5169	18.6162	18.0667	3	427158	68353.7	0.16002
P04899	HPLN1_HUMAN	HAPLN1	80	11	22.126	22.054	21.8149	21.5624	19.681	4	3929490	670997	0.17076
P35613	HPLN3_HUMAN	HAPLN3	17	2	21.2684	21.486	21.1961	20.8961	19.3781	4	2454280	405767	0.165331
O75718	HPPD_HUMAN	HPD	116	12	20.1759	20.0772	20.1902	20.1808	20.2042	4	1168910	42070.3	0.0359912
O75976	HPRT_HUMAN	HPRT1	60	7	19.777	19.6775	19.7043	19.728	19.7091	4	864902	25455.1	0.0294312
P62280	HPT_HUMAN	HP	463	28	28.7417	28.623	28.7804	28.6936	16.6073	4	439369000	20510400	0.0466816
P13674	HPTR_HUMAN	HPR	96	7	22.0109	22.1176	22.1401	22.0171	NaN	4	4410800	204828	0.0464378
Q04917	HS105_HUMAN	HSPH1	55	7	19.1426	19.2665	19.2138	18.8847	19.6756	4	575368	64499	0.1121
P54578	HS3S1_HUMAN	HS3ST1	18	3	NaN	NaN	19.0606	NaN	22.2647	1	546771	NaN	NaN
P11171	HS71A_HUMAN;HS71B_HUMAN	HSPA1A;HSPA1B	209	18	21.1063	21.5336	21.5883	21.5269	22.0016	4	2866920	410579	0.143213
O94907	HS74L_HUMAN	HSPA4L	8	1	NaN	19.5096	NaN	19.4953	NaN	2	742747	5208.99	0.00701315
O75410	HS90A_HUMAN	HSP90AA1	319	31	21.543	21.434	21.438	21.3062	21.9412	4	2830710	188960	0.0667536
Q15555	HS90B_HUMAN	HSP90AB1	100	12	21.0794	21.1724	21.2344	21.0619	21.4696	4	2308850	130448	0.0564989
P35579	HSP13_HUMAN	HSPA13	80	9	20.7036	21.1372	21.1692	21.2334	21.0157	4	2209430	340995	0.154336
P23381	HSP72_HUMAN	HSPA2	24	3	18.4771	19.5942	19.3058	19.5036	19.7549	4	636939	190903	0.299719
Q9UHX1	HSP74_HUMAN	HSPA4	119	15	19.8124	19.8096	19.8244	19.9233	20.4139	4	940592	36042.2	0.0383186
P12081	HSP76_HUMAN	HSPA6	12	1	23.034	23.2241	23.2964	23.1297	23.9283	4	9466440	744337	0.078629
Q96FQ6	HSP7C_HUMAN	HSPA8	252	23	21.5486	21.6138	21.7132	21.5465	21.9922	4	3194440	176029	0.0551047
P40925	HSPB1_HUMAN	HSPB1	80	8	20.6582	20.4581	20.3119	20.2235	20.8825	4	1405290	188831	0.134371
Q8IXL6	HTRA1_HUMAN	HTRA1	45	6	20.1376	20.5586	20.3588	20.3331	22.0545	4	1340870	160137	0.119428
O00231	HUTI_HUMAN	AMDHD1	30	3	20.2195	19.5715	19.9747	20.0769	19.4927	4	1034080	187154	0.180986
P08567	HUTU_HUMAN	UROC1	30	4	20.1716	20.2548	20.486	20.411	19.9474	4	1323740	131129	0.0990592
Q9GZQ3	HUWE1_HUMAN	HUWE1	18	3	21.0546	21.1044	21.0015	21.3615	21.9869	4	2306590	266160	0.115391
Q16706	HV307_HUMAN	IGHV3-7	19	2	20.4249	20.3385	20.2714	20.1575	NaN	4	1292170	100367	0.0776731
P35556	HV315_HUMAN;HV372_HUMAN;HV373_HUMAN	IGHV3-15;IGHV3-72;IGHV3-73	6	1	21.142	20.7717	20.6852	20.6255	19.7457	4	1851970	316078	0.170671
O95865	HV434_HUMAN;HV439_HUMAN;HV459_HUMAN;HV461_HUMAN;HVD34_HUMAN;HVD82_HUMAN	IGHV4-30-4;IGHV4-34;IGHV4-38-2;IGHV4-39;IGHV4-59;IGHV4-61	17	2	19.8141	19.2521	19.4095	19.2909	NaN	4	720996	137352	0.190503
P55010	HXK1_HUMAN	HK1	94	12	19.6095	19.5071	19.6742	19.385	20.9896	4	766579	66298	0.0864855
P15153	HXK3_HUMAN	HK3	27	3	NaN	18.7242	19.2828	18.8913	19.3336	3	519038	106255	0.204714
P29966	HYAL1_HUMAN	HYAL1	25	3	20.4897	21.0509	20.7774	20.6541	NaN	4	1773020	297587	0.167842
P61081	HYES_HUMAN	EPHX2	6	1	19.9749	20.8266	20.7797	20.6439	20.2835	4	1582170	379470	0.239841
Q16769	HYOU1_HUMAN	HYOU1	205	23	20.2527	20.4579	20.4145	20.074	21.4657	4	1297740	153017	0.117911
Q15746	IBP2_HUMAN	IGFBP2	16	2	19.7001	19.5667	20.0372	19.5583	20.4941	4	869076	142691	0.164187
O95372	IBP3_HUMAN	IGFBP3	15	2	19.4208	19.8886	19.6104	19.2543	18.536	4	774567	149074	0.192461
P50570	IBP4_HUMAN	IGFBP4	6	1	NaN	16.6672	17.5284	17.03	18.9688	3	142317	43121	0.302993
Q9UBX1	IBP6_HUMAN	IGFBP6	11	1	19.3677	19.4778	19.5062	19.4359	19.0141	4	715136	29573	0.041353
O95479	IBP7_HUMAN	IGFBP7	12	2	NaN	NaN	NaN	NaN	19.1051	0
P23284	IC1_HUMAN	SERPING1	241	17	24.4542	24.0746	24.2496	24.53	23.3477	4	21205900	2966210	0.139876
O94985	ICAM2_HUMAN	ICAM2	5	1	20.5656	20.5727	20.461	20.5322	NaN	4	1517810	53057.6	0.0349568
Q99988	ICAM3_HUMAN	ICAM3	10	1	21.1082	20.7085	20.8593	21.1887	NaN	4	2066620	313096	0.151501
Q9UN37	ICOSL_HUMAN	ICOSLG	30	3	21.8385	21.8907	21.8771	21.8835	21.4785	4	3839690	61618.5	0.0160478
Q6UWP2	IDE_HUMAN	IDE	32	4	19.8611	19.9739	19.6608	19.6404	19.6232	4	907048	102112	0.112577
P51665	IDHC_HUMAN	IDH1	169	15	21.2601	21.1411	21.2153	21.1235	19.8965	4	2385820	106165	0.044498
Q9UBX5	IDS_HUMAN	IDS	34	5	20.5308	20.5095	20.6811	20.4458	18.1766	4	1529260	107800	0.0704918
P04080	IF1AX_HUMAN;IF1AY_HUMAN	EIF1AX;EIF1AY	16	2	19.4859	19.1141	18.3648	18.9896	20.5058	4	539944	163140	0.302143
P52597	IF2A_HUMAN	EIF2S1	45	6	19.86	19.7506	19.6162	19.5582	20.5673	4	852346	80777.9	0.0947713
P31949	IF2B_HUMAN	EIF2S2	31	4	19.1742	18.9873	NaN	NaN	19.5641	2	555630	50818.5	0.091461
P12004	IF2B2_HUMAN	IGF2BP2	54	6	NaN	NaN	NaN	NaN	18.7232	0
A1L4H1	IF2B3_HUMAN	IGF2BP3	9	1	NaN	NaN	NaN	NaN	17.6702	0
Q9BS26	IF2G_HUMAN	EIF2S3	37	5	18.8144	18.2521	18.3959	18.2413	19.3064	4	356999	71148.3	0.199295
P29279	IF4A1_HUMAN	EIF4A1	49	5	20.328	20.5666	20.3214	20.3282	19.9809	4	1373970	119382	0.0868882
P22234	IF4A2_HUMAN	EIF4A2	90	11	20.9797	20.9222	20.8352	20.808	20.6364	4	1940370	106750	0.0550154
Q12841	IF4A3_HUMAN	EIF4A3	49	6	19.5317	19.562	19.2073	19.2182	19.7253	4	686784	91687	0.133502
Q9BQS7	IF4E_HUMAN	EIF4E	6	1	19.5072	20.1224	19.9355	19.8266	20.5047	4	954786	165030	0.172845
P06730	IF4G1_HUMAN	EIF4G1	37	5	18.2706	19.6985	18.1319	NaN	20.1054	3	484775	317363	0.654661
Q92626	IF4G2_HUMAN	EIF4G2	38	5	18.5169	18.9938	NaN	18.3086	19.1006	3	407264	102535	0.251767
P15907	IF4H_HUMAN	EIF4H	11	2	18.2765	NaN	18.4722	NaN	20.1871	2	340586	32614.9	0.0957611
P61626	IF5_HUMAN	EIF5	17	3	20.0461	20.0222	19.7705	19.6959	20.4566	4	972773	118223	0.121532
Q04941	IF5A1_HUMAN	EIF5A	74	6	20.4043	20.4153	20.6424	20.0418	21.7991	4	1375580	228459	0.166082
P43034	IF6_HUMAN	EIF6	6	1	NaN	NaN	18.5194	NaN	19.6427	1	375755	NaN	NaN
A0A075B6K4	IFM1_HUMAN;IFM2_HUMAN;IFM3_HUMAN	IFITM1;IFITM2;IFITM3	10	1	NaN	NaN	NaN	NaN	17.0585	0
Q7Z7M9	IGDC4_HUMAN	IGDCC4	25	3	18.8586	18.6487	18.7735	18.5965	19.125	4	432708	35809.3	0.0827561
Q9NPG4	IGF1R_HUMAN	IGF1R	5	1	NaN	NaN	NaN	NaN	17.8206	0
P50552	IGF2_HUMAN	IGF2	6	1	23.3594	22.6062	22.7961	23.1635	21.9631	4	8456150	1988740	0.235182
P20908	IGFL1_HUMAN	IGFL1	6	1	NaN	NaN	NaN	NaN	18.5076	0
P01709	IGHA1_HUMAN	IGHA1	102	10	22.7885	22.6209	22.735	22.6536	17.1959	4	6818450	361738	0.0530527
Q6UVK1	IGHA2_HUMAN	IGHA2	12	1	21.4947	21.4469	21.5944	21.44	NaN	4	2956230	148426	0.0502077
P04040	IGHG1_HUMAN	IGHG1	31	4	22.0918	21.77	21.6998	21.7207	19.3153	4	3727150	500249	0.134217
Q9NT22	IGHG2_HUMAN	IGHG2	99	9	23.1039	22.9799	22.9748	22.9217	17.7861	4	8369170	455394	0.0544132
P53999	IGHG3_HUMAN	IGHG3	10	1	18.8286	18.8684	18.7725	18.5859	NaN	4	446349	37440.5	0.0838817
P07355	IGHG4_HUMAN	IGHG4	6	1	NaN	18.3844	18.1341	NaN	NaN	2	314927	38527	0.122336
P34932	IGHM_HUMAN	IGHM	67	7	22.2374	20.0758	20.0126	20.1118	18.8331	4	2060160	1923270	0.933553
P11586	IGJ_HUMAN	JCHAIN	16	1	22.14	22.0322	22.123	22.2222	21.7102	4	4592770	247413	0.0538701
P02458	IGKC_HUMAN	IGKC	66	5	24.4842	24.3862	24.4213	24.3895	17.9381	4	22459600	714692	0.0318212
Q13162	IGLC2_HUMAN;IGLC3_HUMAN	IGLC2;IGLC3	18	2	24.8095	24.5367	24.6628	24.649	17.3737	4	26653200	2085890	0.0782602
Q68BL7	IGLL5_HUMAN	IGLL5	44	3	24.3065	24.3259	24.3762	24.3284	18.5785	4	21154900	437751	0.0206926
P69891	IGSF3_HUMAN	IGSF3	21	3	NaN	NaN	NaN	NaN	17.693	0
P22626	IGSF8_HUMAN	IGSF8	56	6	19.4049	19.1093	19.5071	NaN	21.223	3	668280	92533.8	0.138466
Q12882	IHH_HUMAN	IHH	15	2	20.0757	19.8251	20	20.0304	18.5851	4	1038360	76584.4	0.0737553
P05023	IL1AP_HUMAN	IL1RAP	88	11	21.734	21.6997	21.7641	21.6645	20.5409	4	3445000	102714	0.0298152
Q0VDG4	IL1R2_HUMAN	IL1R2	8	1	20.7967	20.5975	20.7564	20.6095	NaN	4	1694790	119209	0.0703383
P50895	IL6RB_HUMAN	IL6ST	66	7	19.5172	19.7514	19.7357	19.617	19.0728	4	827509	62208.4	0.0751755
P54760	ILEU_HUMAN;SPB8_HUMAN;SPB9_HUMAN;SPI2_HUMAN	SERPINB1;SERPINB8;SERPINB9;SERPINI2	6	1	20.2004	20.4705	19.9403	20.2597	20.9582	4	1229790	183561	0.149262
Q15149	ILF2_HUMAN	ILF2	34	4	19.9187	20.1666	19.9294	19.9189	21.1886	4	1039470	91726.6	0.0882439
P35813	ILF3_HUMAN	ILF3	56	6	NaN	NaN	NaN	NaN	18.0029	0
P61026	ILK_HUMAN	ILK	138	16	20.6261	21.355	21.2881	21.2587	22.1351	4	2342570	488200	0.208404
Q00610	ILRL1_HUMAN	IL1RL1	17	2	NaN	NaN	NaN	NaN	19.8567	0
P02538;P48668	IMB1_HUMAN	KPNB1	126	15	20.2348	20.5978	20.5	20.511	20.6321	4	1449490	151080	0.10423
Q8IUX7	IMDH2_HUMAN	IMPDH2	44	6	19.8156	20.1694	20.1687	19.805	20.9437	4	1049150	149889	0.142866
Q14914	IMPA3_HUMAN	BPNT2	12	2	19.7559	20.1458	20.3549	20.2478	20.4086	4	1157900	196137	0.169391
P21695	INHBA_HUMAN	INHBA	21	3	19.9719	20.4952	19.4087	18.6108	20.549	4	900670	462566	0.51358
Q9BZQ8	INO1_HUMAN	ISYNA1	44	6	20.4053	20.5307	20.4728	20.6598	20.085	4	1503840	114150	0.0759059
P12429	INPP_HUMAN	INPP1	6	1	19.9401	19.2482	19.2728	NaN	19.4272	3	754009	218226	0.289421
O60763	INSR2_HUMAN;INS_HUMAN	INS;INS-IGF2	10	1	26.0746	25.6462	25.7323	25.2355	NaN	4	54608800	12803700	0.234463
Q02790	IP3KB_HUMAN;IP3KC_HUMAN	ITPKB;ITPKC	5	1	NaN	NaN	NaN	NaN	17.0517	0
P63279	IPO4_HUMAN	IPO4	13	2	NaN	NaN	NaN	NaN	16.7368	0
P19623	IPO5_HUMAN	IPO5	104	12	19.1924	19.4026	19.3344	19.3678	19.7831	4	657424	41037.1	0.062421
Q9P232	IPO7_HUMAN	IPO7	35	4	18.8658	19.2009	19.0694	19.2989	19.4792	4	568854	72087.6	0.126724
P13667	IPO9_HUMAN	IPO9	14	2	NaN	18.4593	18.4039	18.2846	19.2364	3	342191	20934.7	0.0611785
Q9NR45	IPYR_HUMAN	PPA1	21	3	NaN	19.2365	18.9527	NaN	20.5177	2	562519	77992.8	0.138649
Q16610	IQGA1_HUMAN	IQGAP1	115	14	19.3076	19.7219	19.759	19.6968	20.6525	4	812673	110274	0.135693
P20339	IQGA2_HUMAN	IQGAP2	19	2	18.5478	19.5929	19.3304	19.2494	19.5174	4	614110	169946	0.276735
Q92896	ISLR_HUMAN	ISLR	7	1	21.1447	21.3938	21.5414	21.4411	20.9667	4	2743280	309217	0.112718
O43488	ISOC1_HUMAN	ISOC1	9	1	20.5816	NaN	19.688	NaN	19.9444	2	1206940	512360	0.424511
Q15365	IST1_HUMAN	IST1	81	9	20.4083	20.1532	20.3504	19.2057	22.5218	4	1124780	359837	0.319918
Q68CQ7	ITA2_HUMAN	ITGA2	113	13	20.7481	20.5292	20.5679	20.5718	20.5468	4	1596840	111422	0.0697765
P14735	ITA3_HUMAN	ITGA3	151	16	20.7109	20.4754	20.4287	19.5504	22.0417	4	1338350	403340	0.301372
P11362	ITA4_HUMAN	ITGA4	12	2	NaN	NaN	NaN	NaN	16.8616	0
P17693	ITA5_HUMAN	ITGA5	34	4	19.6935	19.8405	19.4453	19.651	19.5951	4	830953	92531.7	0.111356
Q01433	ITA6_HUMAN	ITGA6	211	27	20.0951	19.9266	19.7985	20.4051	21.6384	4	1104250	207892	0.188265
P49915	ITAV_HUMAN	ITGAV	83	10	19.3359	19.6595	19.6874	19.1599	20.0556	4	729979	126705	0.173574
Q15435	ITB1_HUMAN	ITGB1	185	21	21.1401	20.8541	20.8867	20.6889	21.6729	4	1958910	258576	0.132
P08476	ITB3_HUMAN	ITGB3	18	3	19.2243	20.012	19.8414	19.4777	19.1165	4	834824	200702	0.240413
Q9BX97	ITB4_HUMAN	ITGB4	261	33	20.0721	19.7181	19.8933	20.2723	22.2827	4	1051250	173732	0.165261
Q9UL25	ITB6_HUMAN	ITGB6	10	1	22.6245	22.6075	22.7166	22.3822	23.644	4	6303980	600488	0.0952553
P48556	ITCH_HUMAN	ITCH	24	3	NaN	18.4893	19.0587	NaN	20.7882	2	457028	125930	0.275542
P35442	ITIH2_HUMAN	ITIH2	23	2	20.5024	20.1439	20	NaN	21.8056	3	1230820	227193	0.184586
P23297	ITIH4_HUMAN	ITIH4	80	9	20.755	20.9975	20.807	20.7484	NaN	4	1864800	155934	0.0836196
Q13094	ITM2B_HUMAN	ITM2B	28	4	19.9148	20.1237	20.1401	20.1033	20.7288	4	1103210	77416.5	0.0701742
P11216	J3KSV1_HUMAN	HP	6	1	21.1859	20.7303	21.0308	20.9863	NaN	4	2086210	266486	0.127737
Q08752	JAG1_HUMAN	JAG1	20	3	NaN	18.2341	18.0238	17.9742	20.1869	3	277442	27124.9	0.0977678
P52272	JAG2_HUMAN	JAG2	6	1	NaN	19.0684	NaN	NaN	20.2857	1	549752	NaN	NaN
O14950;P19105	JAK3_HUMAN	JAK3	15	2	NaN	NaN	NaN	NaN	17.316	0
P06858	JAM1_HUMAN	F11R	41	5	20.35	20.2953	20.3659	19.2964	22.2935	4	1154610	341609	0.295865
P61225	JIP4_HUMAN	SPAG9	14	2	NaN	NaN	NaN	NaN	18.318	0
Q9Y570	K1522_HUMAN	KIAA1522	13	2	NaN	NaN	NaN	NaN	18.2896	0
O95954	K1C10_HUMAN	KRT10	243	24	22.7017	20.2575	21.3146	22.1262	20.6787	4	3815240	2424800	0.635555
P60981	K1C14_HUMAN	KRT14	130	14	20.6688	19.6458	19.9712	20.8726	21.2908	4	1358750	519380	0.38225
Q9P265	K1C16_HUMAN	KRT16	8	1	NaN	NaN	NaN	NaN	17.3381	0
P05121	K1C17_HUMAN	KRT17	51	7	NaN	18.8435	NaN	NaN	21.3813	1	470403	NaN	NaN
Q9UQN3	K1C18_HUMAN	KRT18	85	10	21.3352	20.8761	20.3085	20.7497	20.8183	4	1907960	558810	0.292883
P31150	K1C9_HUMAN	KRT9	178	18	22.2906	20.4477	21.9017	22.0915	20.9184	4	3736880	1615690	0.432365
Q8NBZ7	K22E_HUMAN	KRT2	195	24	22.4655	20.2674	20.9566	21.5091	20.4952	4	3018340	1978540	0.655507
P61254	K2C1_HUMAN	KRT1	288	29	23.1806	21.0374	22.3457	22.8435	21.526	4	6128810	3152660	0.5144
Q7Z304	K2C5_HUMAN	KRT5	126	16	20.9258	19.3011	19.7736	20.8801	20.6706	4	1366040	694989	0.508763
O15143	K2C6A_HUMAN;K2C6C_HUMAN	KRT6A;KRT6C	50	6	19.1577	19.5804	18.5887	20.8756	21.0242	4	921720	686782	0.745109
P02545	K2C7_HUMAN	KRT7	69	8	NaN	18.527	NaN	NaN	22.2776	1	377725	NaN	NaN
P60660	K2C78_HUMAN	KRT78	28	3	18.9447	19.0043	18.9244	18.9065	18.0917	4	504828	15008.5	0.0297298
P13987	K2C8_HUMAN	KRT8	76	10	20.4216	NaN	20.8774	21.0083	21.379	3	1813380	365694	0.201665
Q8N335	K319L_HUMAN	KIAA0319L	7	1	NaN	19.5502	19.0254	18.7646	19.144	3	582232	166583	0.286111
O43707	K7EIR9_HUMAN;K7ELS1_HUMAN	ZNF227	9	1	20.7769	20.4539	20.5302	21.0332	21.2198	4	1723300	321526	0.186575
Q8NDA2	K7EMQ3_HUMAN	DNM2	6	1	NaN	NaN	NaN	NaN	17.3498	0
P08758	KAD1_HUMAN	AK1	28	3	NaN	19.4637	19.268	19.1714	19.4826	3	648259	67906.9	0.104753
Q9UBI6	KAP0_HUMAN	PRKAR1A	57	7	20.1066	20.3093	20.1808	20.1493	20.961	4	1194960	73710.8	0.0616847
Q7L1Q6	KAP2_HUMAN	PRKAR2A	37	4	18.8995	19.6706	19.4695	19.623	19.442	4	714227	157076	0.219924
P55072	KAP3_HUMAN	PRKAR2B	16	2	NaN	NaN	20.0142	NaN	19.5403	1	1058970	NaN	NaN
P46783	KAPCA_HUMAN	PRKACA	27	3	19.6495	20.0428	20.0323	20.1277	20.8826	4	1030130	142328	0.138166
Q9UK41	KAPCG_HUMAN	PRKACG	9	1	NaN	NaN	NaN	NaN	17.4454	0
Q06124	KATL2_HUMAN	KATNAL2	6	1	21.0347	20.5078	20.1019	19.7551	21.7044	4	1412340	550248	0.389599
Q9NY15	KC1A_HUMAN	CSNK1A1	14	2	NaN	NaN	NaN	NaN	17.6651	0
Q8NHP8	KC1D_HUMAN;KC1E_HUMAN	CSNK1D;CSNK1E	9	1	NaN	NaN	NaN	NaN	17.6384	0
Q9HB40	KCC1A_HUMAN	CAMK1	14	2	NaN	NaN	NaN	NaN	18.4357	0
Q9UJJ9	KCD12_HUMAN	KCTD12	51	7	20.138	20.08	20.2355	20.2057	20.7698	4	1176500	56545.4	0.0480623
Q9H074	KCRB_HUMAN	CKB	24	3	20.712	21.1248	21.1345	21.079	21.4741	4	2130380	277774	0.130387
Q13363	KCRM_HUMAN	CKM	80	11	21.058	21.2737	21.3321	21.0987	18.8755	4	2400980	221144	0.0921055
P18065	KCY_HUMAN	CMPK1	23	3	NaN	19.157	19.4237	19.4994	19.4846	3	676334	81697.4	0.120795
O43280	KERA_HUMAN	KERA	11	2	20.1816	20.311	20.5798	20.3795	20.7732	4	1355340	158691	0.117086
P62081	KGP1_HUMAN	PRKG1	17	2	NaN	NaN	17.9225	NaN	18.1881	1	248441	NaN	NaN
Q6GTS8	KGUA_HUMAN	GUK1	15	2	NaN	18.7518	19.4065	NaN	18.8021	2	568175	179254	0.31549
P62899	KIF1A_HUMAN	KIF1A	10	1	19.9916	NaN	NaN	NaN	18.4556	1	1042500	NaN	NaN
P48147	KIF2A_HUMAN	KIF2A	13	2	NaN	NaN	NaN	NaN	18.5872	0
O00584	KINH_HUMAN	KIF5B	35	4	NaN	NaN	NaN	19.2583	18.9025	1	627087	NaN	NaN
P00492	KIRR1_HUMAN	KIRREL1	6	1	NaN	NaN	NaN	NaN	17.6388	0
Q9Y265	KIT_HUMAN	KIT	20	3	20.4661	20.2277	20.302	20.2484	19.5461	4	1303680	100362	0.0769841
P49327	KITM_HUMAN	TK2	8	1	21.3654	21.3882	21.2632	21.1814	NaN	4	2585360	169818	0.0656843
Q9NRV9	KLK5_HUMAN	KLK5	64	7	NaN	NaN	NaN	NaN	19.7816	0
Q9ULA0	KLK6_HUMAN	KLK6	6	1	NaN	NaN	NaN	NaN	18.5176	0
Q86YQ8	KLKB1_HUMAN	KLKB1	167	19	21.2131	21.2263	21.2625	21.158	19.7195	4	2434900	72837.2	0.0299139
P07858	KNG1_HUMAN	KNG1	165	14	22.7047	22.6556	22.7304	22.6362	NaN	4	6730220	202612	0.0301048
P17050	KPCA_HUMAN;KPCB_HUMAN	PRKCA;PRKCB	14	2	19.0647	19.0914	19.2472	19.0162	19.2089	4	564845	40042.5	0.0708912
Q08209	KPRA_HUMAN	PRPSAP1	6	1	17.5249	19.0323	18.7162	18.011	18.7125	4	354896	157575	0.444004
Q01415	KPRP_HUMAN	KPRP	6	1	18.8079	NaN	17.5056	18.0286	17.3785	3	304136	140083	0.460594
P53985	KPYM_HUMAN	PKM	370	29	21.5236	21.7373	21.7355	21.701	21.8534	4	3352960	229002	0.0682986
Q8NES3	KPYR_HUMAN	PKLR	24	3	19.9411	20.0357	20.2175	20.2572	19.5544	4	1138460	117055	0.102819
P35998	KRT85_HUMAN	KRT85	10	1	20.747	NaN	NaN	NaN	20.4516	1	1759770	NaN	NaN
P60033	KS6A3_HUMAN	RPS6KA3	32	4	18.845	18.9888	18.6395	18.8004	18.8959	4	464003	46042.6	0.099229
Q14703	KT3K_HUMAN	FN3KRP	9	1	NaN	NaN	NaN	NaN	16.9495	0
Q9NVA2	KTN1_HUMAN	KTN1	82	11	NaN	18.6972	19.0443	18.8706	20.0232	3	481670	57846.6	0.120096
Q9NUQ9	KV105_HUMAN	IGKV1-5	5	1	20.9242	20.6521	20.7162	20.4085	NaN	4	1687990	246063	0.145772
Q9NTN9	KV315_HUMAN;KV37_HUMAN;KVD07_HUMAN	IGKV3-15;IGKV3-7;IGKV3D-7	5	1	22.3274	22.3117	22.3055	22.0154	NaN	4	4972950	490237	0.0985808
Q16222	KV320_HUMAN	IGKV3-20	23	3	23.4772	23.3982	23.5091	23.4492	21.3377	4	11530900	374274	0.0324584
P05198	KV401_HUMAN	IGKV4-1	15	2	20.6148	20.6729	20.4424	20.5261	NaN	4	1553100	108222	0.0696818
Q13822	KVD28_HUMAN	IGKV2D-28	12	1	23.1814	22.9235	23.0769	22.9511	NaN	4	8606150	718962	0.0835405
Q6ZN66;Q96PP9	L1CAM_HUMAN	L1CAM	16	2	NaN	NaN	NaN	NaN	17.6529	0
P09651	LA_HUMAN	SSB	6	1	NaN	18.7111	NaN	NaN	19.3724	1	429150	NaN	NaN
Q16555	LAMA1_HUMAN	LAMA1	8	1	20.3048	20.2988	20.178	20.2014	20.2175	4	1244260	56365.5	0.0453005
Q9UNM6	LAMA2_HUMAN	LAMA2	261	30	19.9481	20.1746	20.1774	20.0716	19.4537	4	1120670	82570.1	0.0736791
Q709C8	LAMA3_HUMAN	LAMA3	585	60	20.2653	20.296	20.3167	20.0292	23.2967	4	1230920	108892	0.0884638
P36578	LAMA5_HUMAN	LAMA5	865	81	20.3408	20.2118	20.0152	19.0058	21.5834	4	1032100	354604	0.343576
Q96AG4	LAMB1_HUMAN	LAMB1	503	43	21.0453	20.9321	20.9984	20.7871	21.8389	4	2017290	153904	0.0762927
P54920	LAMB2_HUMAN	LAMB2	77	11	NaN	18.5752	18.5828	18.9054	19.8161	3	424732	57423.5	0.135199
P29034	LAMB3_HUMAN	LAMB3	563	43	20.5166	20.2966	20.3208	18.9285	24.1564	4	1149140	443830	0.386227
Q15369	LAMC1_HUMAN	LAMC1	520	48	20.8958	20.9037	20.9186	20.4647	21.9499	4	1835450	259227	0.141234
P61221	LAMC2_HUMAN	LAMC2	436	39	20.4846	20.5937	20.6255	19.1207	23.9309	4	1309310	497032	0.379614
P38571	LAMP1_HUMAN	LAMP1	31	4	22.9776	22.8082	22.9236	22.8836	19.7325	4	7824390	384850	0.049186
P21941	LAMP2_HUMAN	LAMP2	36	4	23.8809	24.1325	24.033	24.0157	18.7253	4	16991200	1207610	0.0710727
Q9UPY8	LANC1_HUMAN	LANCL1	25	3	19.9069	19.9411	20.0667	20.3248	20.1815	4	1100300	150471	0.136755
P52888	LASP1_HUMAN	LASP1	28	4	19.4573	19.6215	19.634	19.632	20.563	4	788135	45631.3	0.0578978
P29323	LAT1_HUMAN	SLC7A5	30	4	21.9318	21.2546	21.3029	20.1518	23.2969	4	2563610	1158360	0.451846
P05106	LCAT_HUMAN	LCAT	140	13	23.782	23.854	23.9046	23.7545	20.4787	4	14860700	705800	0.0474945
P06748	LCMT1_HUMAN	LCMT1	6	1	NaN	NaN	NaN	NaN	18.7777	0
P19883	LCN1_HUMAN	LCN1	7	1	21.4648	20.7021	21.396	20.9293	20.3051	4	2339140	578183	0.247177
Q8N0Y7	LCP2_HUMAN	LCP2	17	2	NaN	19.8364	19.7098	NaN	18.9619	2	896823	55623.5	0.0620228
Q9H0E2	LDHA_HUMAN	LDHA	74	8	21.5762	21.5878	21.6932	21.7129	22.1315	4	3276670	160153	0.0488769
Q9Y3E7	LDHB_HUMAN	LDHB	132	13	21.7852	21.647	21.8087	21.746	21.6493	4	3522150	171447	0.0486767
Q8NG11	LDLR_HUMAN	LDLR	90	10	19.9303	20.0862	20.1258	20.1758	20.1109	4	1110230	79612.3	0.071708
P08648	LECT2_HUMAN	LECT2	17	2	NaN	19.2076	NaN	NaN	21.3816	1	605444	NaN	NaN
O00571	LEG1_HUMAN	LGALS1	43	4	20.5423	20.5847	20.7301	20.8483	21.0167	4	1681700	164993	0.0981108
Q8IZ83	LEG3_HUMAN	LGALS3	62	4	19.5408	19.553	19.6731	19.4938	20.2384	4	776550	41798.6	0.0538261
Q9UBQ0	LEG8_HUMAN	LGALS8	27	3	NaN	NaN	NaN	NaN	18.1969	0
Q8N5I2	LEGL_HUMAN	LGALSL	47	5	19.5293	19.6266	19.5326	19.7442	21.1439	4	800681	57197.4	0.071436
P40189	LFA3_HUMAN	CD58	9	1	NaN	NaN	NaN	NaN	18.5262	0
P10321	LFG3_HUMAN	TMBIM1	6	1	20.0794	19.8626	NaN	NaN	20.8335	2	1030610	109346	0.106099
Q8WUA8	LFNG_HUMAN	LFNG	46	6	19.8745	19.7677	19.7159	19.462	21.0712	4	859295	100488	0.116942
Q9Y6W3	LG3BP_HUMAN	LGALS3BP	189	18	21.8943	21.8012	21.6929	21.0026	23.1804	4	3260900	800648	0.24553	+
P13798	LGUL_HUMAN	GLO1	42	6	20.2988	20.3624	20.4722	20.4031	20.5861	4	1369760	69120.9	0.0504621
P09486	LICH_HUMAN	LIPA	47	5	19.5002	20.0211	19.6581	19.449	21.4006	4	837143	158574	0.189422
H9KV75	LIMS1_HUMAN	LIMS1	57	5	19.9729	20.2256	20.3558	20.3623	21.3368	4	1236230	149035	0.120556
P09172	LIPC_HUMAN	LIPC	7	1	21.5425	21.5365	21.628	21.7846	20.9926	4	3237500	266122	0.0821998
P27539	LIPL_HUMAN	LPL	31	4	19.5169	19.9504	19.7451	19.8242	19.5894	4	892589	109958	0.12319
Q9Y6E0	LIRA2_HUMAN	LILRA2	10	1	20.448	19.8398	20.2322	20.3118	17.8707	4	1225500	208381	0.170038
Q9Y262	LIRA3_HUMAN	LILRA3	37	5	20.8787	20.8493	20.8862	20.7883	NaN	4	1891540	57734.3	0.0305224
Q02750	LIRB5_HUMAN	LILRB5	8	1	19.1839	19.1322	19.305	18.6867	NaN	4	559963	97005.1	0.173235
P38606	LIS1_HUMAN	PAFAH1B1	73	9	19.8278	19.9448	19.8417	19.8059	20.355	4	948984	41249	0.0434664
Q9NZL9	LKHA4_HUMAN	LTA4H	74	8	20.2627	20.3426	20.3399	20.3497	20.1148	4	1312770	36697.1	0.027954
Q13200	LMAN1_HUMAN	LMAN1	7	1	NaN	19.5123	19.7063	19.1006	20.1976	3	721806	148383	0.205572
P41250	LMAN2_HUMAN	LMAN2	59	8	20.757	20.5596	20.729	20.6269	21.5264	4	1668700	105035	0.062944
O00151	LMNA_HUMAN	LMNA	41	5	20.2738	19.6545	19.0905	NaN	20.9366	3	883730	358321	0.405465
Q13232	LMNB2_HUMAN	LMNB2	13	2	NaN	NaN	NaN	NaN	16.312	0
Q9Y224	LOXL2_HUMAN	LOXL2	108	11	20.1544	19.9119	20.0712	19.9695	21.3802	4	1070440	80162.6	0.0748874
P61201	LPP_HUMAN	LPP	13	2	NaN	19.5423	19.5508	19.3899	21.4665	3	739503	45547.6	0.0615922
P07237	LRBA_HUMAN	LRBA	21	3	17.7326	19.2032	19.2391	19.1749	19.665	4	508003	193790	0.381475
F8VWZ5	LRC57_HUMAN	LRRC57	8	1	NaN	NaN	NaN	NaN	18.2102	0
Q9H444	LRC59_HUMAN	LRRC59	28	3	19.7242	19.7636	19.6453	19.579	19.8444	4	839858	47661.2	0.0567491
Q08345	LRC8A_HUMAN	LRRC8A	8	1	20.8364	21.2317	21.2343	21.2763	21.6928	4	2335420	310783	0.133074
P55287	LRP1_HUMAN	LRP1	825	73	20.9101	21.0156	21.0886	21.1825	20.8244	4	2175110	173093	0.0795791
Q9H8M9	LRP5_HUMAN	LRP5	16	2	NaN	18.8874	18.9144	18.7493	18.5171	3	473232	28573.4	0.0603792
P62333	LRRN1_HUMAN	LRRN1	23	3	19.111	18.9665	18.8019	18.9861	19.4017	4	513691	44735.8	0.087087
P46940	LSM2_HUMAN	LSM2	5	1	NaN	NaN	NaN	NaN	17.5738	0
P00749	LSM3_HUMAN	LSM3	10	1	NaN	19.239	18.9238	19.0212	19.8162	3	549380	62549.3	0.113854
P62847	LSM4_HUMAN	LSM4	4	1	NaN	NaN	NaN	NaN	18.3325	0
Q9BR76	LSM6_HUMAN	LSM6	7	1	19.6219	18.9316	NaN	19.0413	20.0172	3	615443	166895	0.27118
P23141	LSR_HUMAN	LSR	86	10	19.1997	18.8943	19.3598	19.2621	20.7809	4	597720	79217.7	0.132533
P17900	LTBP1_HUMAN	LTBP1	23	3	NaN	NaN	20.423	20.6362	19.9235	2	1517820	158311	0.104302
Q5T0I0	LTBP2_HUMAN	LTBP2	25	3	18.3293	NaN	NaN	NaN	18.5947	1	329366	NaN	NaN
Q6NZI2	LTBP3_HUMAN	LTBP3	42	5	NaN	NaN	NaN	NaN	18.5858	0
O43681	LTBP4_HUMAN	LTBP4	117	13	20.0421	19.9877	20.1234	20.0655	21.0376	4	1089690	42510.2	0.0390114
Q92187	LUM_HUMAN	LUM	30	4	21.8964	22.1263	21.9913	21.9088	NaN	4	4147080	310584	0.0748923
Q15233	LV147_HUMAN	IGLV1-47	9	1	20.2616	20.199	20.352	20.1423	NaN	4	1239080	77728.3	0.0627304
P23921	LV208_HUMAN	IGLV2-8	6	1	19.806	20.1023	20.0119	19.3836	NaN	4	945889	195083	0.206243
Q3ZCW2	LV310_HUMAN	IGLV3-10	5	1	19.728	19.9615	19.7	20.001	NaN	4	947569	101966	0.107608
Q9Y6U3	LV743_HUMAN;LV746_HUMAN	IGLV7-43;IGLV7-46	8	1	21.3351	21.3083	21.382	21.1632	NaN	4	2580850	164970	0.0639208
Q08211	LYAG_HUMAN	GAA	57	7	19.5109	19.3087	19.2209	19.2848	20.0088	4	661550	59279.8	0.0896075
P05089	LYAM1_HUMAN	SELL	53	5	22.9528	22.8196	22.749	22.8058	17.7677	4	7475660	454906	0.0608517
O95340	LYN_HUMAN	LYN	66	7	18.8428	19.42	18.9721	18.2654	20.118	4	500244	159024	0.317893
Q96BZ4	LYPA1_HUMAN	LYPLA1	8	1	NaN	NaN	NaN	NaN	19.9563	0
P15880	LYPA2_HUMAN	LYPLA2	19	2	19.8476	19.8263	20.0635	19.7958	20.4368	4	969766	85115.9	0.0877696
P16278	LYSC_HUMAN	LYZ	27	3	20.0859	19.665	19.7803	19.8702	18.5779	4	950749	119920	0.126132
P98172	LYVE1_HUMAN	LYVE1	24	3	22.332	21.8662	21.924	22.2508	NaN	4	4518040	725071	0.160483
Q9ULB1	M4K4_HUMAN	MAP4K4	30	5	NaN	NaN	17.6658	NaN	19.6068	1	207945	NaN	NaN
Q14847	MA1A1_HUMAN	MAN1A1	31	4	21.3614	21.28	21.422	21.3472	21.2458	4	2679470	108080	0.0403363
Q504Y2	MA2A1_HUMAN	MAN2A1	57	8	19.572	20.0184	19.9776	19.9682	20.7285	4	974888	131294	0.134676
Q13332	MA2A2_HUMAN	MAN2A2	14	2	18.9473	19.4058	19.6835	19.7617	20.2231	4	732746	172663	0.235638
Q6ZRP7	MA2B1_HUMAN	MAN2B1	39	4	21.0968	20.5496	20.4814	20.8455	21.0295	4	1781380	358204	0.201082
P62906	MACF1_HUMAN	MACF1	22	3	NaN	NaN	NaN	NaN	18.2654	0
P26373	MAGD2_HUMAN	MAGED2	26	4	19.1882	18.8129	NaN	18.7671	20.6024	3	501321	83462.7	0.166486
P62136	MAMC2_HUMAN	MAMDC2	70	9	19.3557	19.9166	19.9559	19.7232	19.9609	4	885769	157691	0.178027
Q9Y3L5	MANBA_HUMAN	MANBA	84	10	20.5986	20.6701	20.7743	20.6218	19.0475	4	1665830	91504.2	0.05493
Q9HCY8	MAOX_HUMAN	ME1	26	4	20.8484	20.7356	20.8828	21.007	21.9118	4	1918700	149011	0.0776628
P55285	MAPK2_HUMAN;MAPK3_HUMAN;PRKX_HUMAN;PRKY_HUMAN;TSSK3_HUMAN	MAPKAPK2;MAPKAPK3;PRKX;PRKY;TSSK3	8	1	NaN	19.2692	19.565	NaN	19.4677	2	703729	101649	0.144444
Q9Y274	MARCS_HUMAN	MARCKS	47	4	20.6433	19.5825	20.0524	18.531	22.0855	4	972244	530216	0.545352
P62424	MARE1_HUMAN	MAPRE1	38	5	20.7027	20.3007	20.7195	20.5816	21.3781	4	1573480	200557	0.127461
Q04446	MARE2_HUMAN	MAPRE2	83	9	19.8634	19.8532	19.9179	19.9819	21.4181	4	981746	40605.2	0.0413602
P60891	MARE3_HUMAN	MAPRE3	9	1	NaN	19.674	NaN	NaN	20.5416	1	836470	NaN	NaN
P61978	MASP1_HUMAN	MASP1	40	5	22.2129	22.0107	22.2126	22.243	21.3407	4	4727730	338211	0.0715377
Q9UIW2	MASP2_HUMAN	MASP2	20	2	20.8382	21.0283	21.3062	21.18	18.3166	4	2245560	309146	0.13767
Q8IZ52	MAT2B_HUMAN	MAT2B	13	2	19.6759	19.5976	19.6591	19.6439	19.0911	4	819533	18993.6	0.0231762
P48444	MATN1_HUMAN	MATN1	25	3	19.1777	19.9495	19.6732	19.7876	19.7969	4	836646	177896	0.21263
P17931	MATN3_HUMAN	MATN3	22	3	18.559	20.343	19.3425	19.4521	21.4448	4	774564	397788	0.513564
Q9NQC3	MATN4_HUMAN	MATN4	25	3	18.5044	18.95	18.8633	19.1821	19.7246	4	487504	91951.4	0.188617
Q00839	MATR3_HUMAN	MATR3	27	3	18.8297	19.2035	18.6677	NaN	19.5596	3	495350	97044.4	0.195911
P02675	MB12A_HUMAN	MVB12A	27	4	NaN	18.774	NaN	NaN	20.5304	1	448253	NaN	NaN
P17936	MBB1A_HUMAN	MYBBP1A	6	1	NaN	NaN	NaN	NaN	17.7749	0
O15232	MBNL1_HUMAN;MBNL2_HUMAN;MBNL3_HUMAN	MBNL1;MBNL2;MBNL3	8	1	18.9023	19.4055	18.8144	18.7363	20.1729	4	520526	117960	0.226616
Q01970	MBTP1_HUMAN	MBTPS1	15	2	19.5467	19.6552	19.8216	19.7908	19.6764	4	856303	74465.3	0.0869614
O75369	MCM3_HUMAN	MCM3	25	4	19.3701	18.9509	17.9426	17.7723	19.1738	4	415036	216415	0.521436
Q14050	MCM4_HUMAN	MCM4	14	2	NaN	NaN	NaN	NaN	17.7817	0
P30825	MCM6_HUMAN	MCM6	12	2	NaN	NaN	NaN	NaN	16.9433	0
Q96C36	MCM7_HUMAN	MCM7	29	3	19.2761	19.1897	19.1341	19.0183	19.9285	4	584797	43464	0.0743233
P55786	MCP_HUMAN	CD46	25	4	NaN	19.2805	18.8698	NaN	21.3708	2	557926	111571	0.199974
Q03135	MCTS1_HUMAN	MCTS1	13	2	NaN	19.158	19.0683	18.4552	19.2754	3	498017	121338	0.243643
O94973	MDHC_HUMAN	MDH1	46	4	19.9806	19.8447	19.935	19.8324	21.4596	4	978030	48625.3	0.0497175
P35222	MDHM_HUMAN	MDH2	25	3	18.299	18.9639	18.9625	19.0122	19.752	4	468364	97583.5	0.20835
P02786	MEAK7_HUMAN	MEAK7	40	4	NaN	17.5947	17.8309	NaN	20.5896	2	215542	24897.8	0.115513
Q58EX2	MEG10_HUMAN	MEGF10	19	1	20.4207	19.9205	19.863	20.0341	19.3973	4	1105800	204748	0.185159
Q9Y295	MEGF8_HUMAN	MEGF8	27	3	18.9911	18.9575	19.0618	19.2406	18.699	4	549201	49461.4	0.0900608
P19367	MEMO1_HUMAN	MEMO1	21	3	19.5036	19.3257	19.5882	19.4631	19.9514	4	727828	54507.4	0.0748904
Q9HCL0	MEP50_HUMAN	WDR77	17	2	19.0187	18.4936	18.7606	18.7976	19.5225	4	450002	66325.1	0.147388
P13497	MEST_HUMAN	MEST	15	2	NaN	NaN	NaN	NaN	17.8532	0
Q9ULI3	MET_HUMAN	MET	139	16	20.1717	19.9586	20.1728	20.0759	21.1415	4	1121790	77444.7	0.0690365
O43556	METK1_HUMAN	MAT1A	28	3	20.2596	20.4107	20.4508	20.3665	20.3077	4	1358570	76443.3	0.0562675
P10809	METK2_HUMAN	MAT2A	58	6	20.1389	20.1656	20.2538	20.257	20.1296	4	1208480	50634.5	0.0418993
P13797	MFAP2_HUMAN	MFAP2	15	1	20.0424	20.1233	20.186	20.1389	20.1976	4	1142360	46908.9	0.041063
O94856	MFAP5_HUMAN	MFAP5	8	1	21.7512	21.4986	21.7418	21.6396	21.5965	4	3316750	264133	0.0796361
P08243	MFGM_HUMAN	MFGE8	59	7	19.4172	19.8553	19.5668	18.8358	21.2253	4	723269	199439	0.275746
Q9H0U4	MGA_HUMAN	MGAM	20	3	19.8295	20.4048	19.7759	19.8914	18.7831	4	1047540	229162	0.218763
O60716	MGAT1_HUMAN	MGAT1	21	3	19.9891	20.6339	20.63	20.3093	21.4114	4	1397460	283100	0.202582
Q5VW32	MGAT2_HUMAN	MGAT2	38	4	20.811	21.186	21.1523	21.1526	21.687	4	2221760	256049	0.115246
Q9BXD5	MGT5A_HUMAN	MGAT5	6	1	NaN	NaN	NaN	18.2665	18.6634	1	315325	NaN	NaN
P62495	MIA_HUMAN	MIA	6	1	NaN	19.0153	19.1052	NaN	22.0516	2	546925	24089.8	0.044046
Q9C0C4	MICA1_HUMAN	MICAL1	8	1	NaN	NaN	NaN	NaN	17.6547	0
P10155	MIF_HUMAN	MIF	17	2	20.4476	20.1267	20.228	20.0755	21.5523	4	1226950	144768	0.11799
P12956	MIME_HUMAN	OGN	85	8	22.1155	22.4141	22.4976	22.464	22.2178	4	5459960	625853	0.114626
P50225;P50226	MINK1_HUMAN	MINK1	8	2	NaN	NaN	NaN	NaN	15.1985	0
O60568	MINP1_HUMAN	MINPP1	6	1	18.8437	18.9899	18.8382	18.62	20.4802	4	465658	48287.3	0.103697
P49407	MIS_HUMAN	AMH	18	2	19.9371	20.0601	19.9271	20.3354	20.2484	4	1104230	152290	0.137914
Q9NQW7	MITD1_HUMAN	MITD1	64	7	19.121	19.6192	19.2214	NaN	21.2889	3	662246	125613	0.189677
P49441	MK01_HUMAN	MAPK1	71	9	20.1109	19.9707	20.0584	20.0711	19.5975	4	1088330	44073.9	0.040497
P48739	MK08_HUMAN;MK09_HUMAN;MK10_HUMAN	MAPK10;MAPK8;MAPK9	8	1	NaN	NaN	NaN	NaN	17.9262	0
G8JL96	MK14_HUMAN	MAPK14	14	2	NaN	18.8481	18.0268	18.7149	19.349	3	389738	108258	0.277772
P11172	MK15_HUMAN	MAPK15	6	1	22.2478	21.9854	22.0977	22.1383	21.6161	4	4559260	342133	0.0750413
O00469	ML12A_HUMAN;ML12B_HUMAN	MYL12A;MYL12B	12	2	19.4093	20.1637	19.9602	19.3745	20.4772	4	892634	244693	0.274125
P47914	MLH1_HUMAN	MLH1	11	2	21.885	20.842	21.4724	21.7167	19.8417	4	3027160	860593	0.284291
Q9Y696	MMP1_HUMAN	MMP1	70	11	NaN	NaN	18.5434	NaN	20.1877	1	382043	NaN	NaN
P55212	MMP14_HUMAN	MMP14	47	7	20.1725	20.2451	20.3383	19.6024	21.5345	4	1136540	234561	0.206382
P14923	MMP16_HUMAN	MMP16	8	1	19.5666	19.1008	19.496	19.0285	18.9942	4	653224	122396	0.187373
O43396	MMP2_HUMAN	MMP2	54	7	19.0242	18.8092	18.7292	18.862	20.6761	4	475876	41889.5	0.0880262
Q13813	MMP9_HUMAN	MMP9	35	5	19.2494	19.1998	19.2592	19.4043	18.8315	4	636677	39691.4	0.0623416
Q9UKU9	MMRN1_HUMAN	MMRN1	19	2	NaN	19.5776	19.2566	NaN	18.4012	2	704377	110352	0.156666
Q14166	MMRN2_HUMAN	MMRN2	13	2	18.4975	17.9064	NaN	NaN	19.3429	2	307880	87975.1	0.285745
P50897	MMS19_HUMAN	MMS19	6	1	NaN	NaN	NaN	NaN	18.9388	0
Q99873	MOB1A_HUMAN;MOB1B_HUMAN	MOB1A;MOB1B	21	3	20.7763	20.6941	20.7586	20.5554	20.7341	4	1701880	115452	0.0678378
O00423	MOES_HUMAN	MSN	314	30	20.4567	20.35	20.3022	19.9268	22.2057	4	1266280	189861	0.149936
O95747	MON2_HUMAN	MON2	15	2	NaN	NaN	NaN	NaN	17.3983	0
P29317	MOT1_HUMAN	SLC16A1	32	3	19.9992	19.407	19.6015	19.7919	21.3556	4	861609	151602	0.175952
O43242	MOT4_HUMAN	SLC16A3	32	5	19.7157	20.4359	20.1096	19.1454	22.1245	4	997692	359724	0.360556
O95757	MOV10_HUMAN	MOV10	48	7	NaN	NaN	NaN	NaN	19.4924	0
Q8NFY4	MP2K1_HUMAN	MAP2K1	27	4	19.6831	19.5595	19.7039	19.6463	20.3641	4	822271	35821.4	0.043564
Q93052	MP2K3_HUMAN	MAP2K3	27	3	17.9263	18.4441	18.4252	19.0922	18.2786	4	379152	129705	0.342092
Q99816	MP2K4_HUMAN	MAP2K4	7	1	NaN	NaN	NaN	NaN	16.6411	0
Q9NVS9	MPRI_HUMAN	IGF2R	222	29	21.9181	21.285	21.3412	21.7417	21.6411	4	3170380	679024	0.214177
O43633	MPRIP_HUMAN	MPRIP	8	1	NaN	NaN	NaN	NaN	18.8178	0
P62993	MPZL1_HUMAN	MPZL1	37	4	19.2132	NaN	NaN	NaN	21.6902	1	607801	NaN	NaN
O95394	MRC1_HUMAN	MRC1	28	3	20.4354	20.6638	20.7971	20.8903	19.9467	4	1711230	227123	0.132725
Q96H15	MRC2_HUMAN	MRC2	232	21	20.825	21.1023	21.1504	21.1529	21.0926	4	2191970	226001	0.103104
P09619	MRE11_HUMAN	MRE11	20	3	NaN	NaN	NaN	NaN	17.8784	0
P37108	MRP_HUMAN	MARCKSL1	25	3	19.4658	18.9245	19.4261	18.9793	21.08	4	610712	120071	0.196609
P31151	MT1E_HUMAN;MT1G_HUMAN;MT1M_HUMAN;MT1X_HUMAN;MT2_HUMAN	MT1E;MT1G;MT1M;MT1X;MT2A	12	1	21.4864	21.0671	21.6539	21.8461	20.8027	4	3051100	663513	0.217467
P49641	MTAP_HUMAN	MTAP	39	4	20.8493	20.7809	20.8438	20.6966	21.0962	4	1818040	88472.3	0.0486635
O43236	MTNA_HUMAN	MRI1	15	2	NaN	17.8405	NaN	17.8037	18.2635	2	231747	4175.01	0.0180154
Q9BRA2	MTPN_HUMAN	MTPN	18	2	20.5211	20.7238	20.8339	20.912	20.4575	4	1769650	202392	0.114368
Q9UQ80	MTREX_HUMAN	MTREX	15	2	21.1994	21.995	21.7054	21.9904	20.6144	4	3543500	836290	0.236006
P06756	MUC18_HUMAN	MCAM	64	9	22.8621	22.8008	22.8706	22.7327	16.009	4	7392360	324350	0.0438763
O95782	MUC6_HUMAN	MUC6	7	1	21.1	21.0932	21.0811	20.9509	20.8157	4	2182530	104400	0.0478346
Q9H223	MUCL1_HUMAN	MUCL1	9	1	NaN	NaN	22.3128	NaN	17.2855	1	5209670	NaN	NaN
Q9H4M9	MXRA8_HUMAN	MXRA8	16	2	NaN	20.4536	20.6536	20.6823	20.4998	3	1589350	133892	0.0842432
Q9Y316	MYD88_HUMAN	MYD88	5	1	NaN	NaN	NaN	NaN	17.0543	0
Q9Y5X3	MYG_HUMAN	MB	4	1	20.7364	20.7994	21.044	20.7086	NaN	4	1861870	205507	0.110377
P18440	MYH9_HUMAN	MYH9	566	59	19.4975	20.2047	20.0309	19.7837	21.0731	4	980613	203338	0.207359
O75897	MYL6_HUMAN	MYL6	78	7	19.5682	19.8547	19.9542	19.5956	21.0278	4	883378	117278	0.132761
P16422	MYLK_HUMAN	MYLK	65	8	20.1781	19.5724	19.8554	19.8807	20.9319	4	969986	166875	0.172039
Q14126	MYO1B_HUMAN	MYO1B	85	11	19.5998	19.6765	19.5197	18.1153	21.475	4	667028	257809	0.386504
Q08431	MYO1C_HUMAN	MYO1C	66	9	18.9109	19.1988	19.0754	NaN	20.6337	3	549024	54521.5	0.0993062
O00154	MYOF_HUMAN	MYOF	67	10	NaN	NaN	NaN	NaN	18.2559	0
Q99439	NAA15_HUMAN	NAA15	15	2	NaN	NaN	NaN	NaN	18.9568	0
P12931	NAA50_HUMAN	NAA50	14	2	NaN	NaN	NaN	NaN	18.5051	0
P49257	NACAM_HUMAN;NACA_HUMAN	NACA	7	1	NaN	NaN	NaN	NaN	16.6927	0
O60493	NADC_HUMAN	QPRT	17	2	21.5595	NaN	19.2262	18.8267	20.2468	3	1389670	1475060	1.06144
B5ME19;Q99613	NAGAB_HUMAN	NAGA	43	4	19.7567	19.5986	19.8366	19.6727	20.3983	4	862945	61670.6	0.0714653
P49458	NAGK_HUMAN	NAGK	17	2	NaN	NaN	NaN	18.9594	19.6204	1	509727	NaN	NaN
A0A0C4DH41;P01824;P01825;P06331;P0DP06;P0DP08	NAMPT_HUMAN	NAMPT	16	2	20.5661	20.5517	20.9378	20.4412	20.2003	4	1630450	258590	0.1586
Q99829	NAR3_HUMAN	ART3	38	6	21.0547	21.0515	20.9629	21.0112	19.5558	4	2127230	62918.8	0.0295778
P01137	NBEL2_HUMAN	NBEAL2	31	5	17.5305	19.3618	19.1111	19.1883	19.9935	4	506671	216327	0.426958
P13671	NCAM1_HUMAN	NCAM1	70	7	21.4843	21.0517	21.2308	21.473	21.9787	4	2619730	368537	0.140678
O94779	NCAM2_HUMAN	NCAM2	16	2	18.6362	18.3472	18.5622	19.0208	19.7347	4	414960	83961.4	0.202336
P07814	NCHL1_HUMAN	CHL1	58	7	20.4969	20.3566	20.4582	20.5179	19.8072	4	1441090	70314	0.0487924
P11387	NCK1_HUMAN	NCK1	12	2	NaN	NaN	NaN	NaN	18.0995	0
P35555	NCKP1_HUMAN	NCKAP1	17	3	NaN	NaN	NaN	NaN	17.9368	0
P35573	NCS1_HUMAN	NCS1	5	1	NaN	NaN	NaN	NaN	17.4964	0
P24592	NDK3_HUMAN	NME3	41	5	19.5543	19.6248	19.5452	19.8178	19.0745	4	816888	74125	0.0907407
Q16543	NDKB_HUMAN	NME2	61	6	20.6227	19.7562	19.9662	19.9972	20.986	4	1142710	322494	0.282219
P13861	NDRG1_HUMAN	NDRG1	11	1	NaN	NaN	NaN	NaN	19.2863	0
P84095	NDRG2_HUMAN	NDRG2	10	1	NaN	NaN	NaN	NaN	17.614	0
Q92823	NDST1_HUMAN	NDST1	48	6	19.1751	19.4766	19.5312	19.4567	19.5655	4	699659	73603.2	0.105199
Q92973	NDST2_HUMAN	NDST2	5	1	NaN	NaN	17.9561	NaN	19.2036	1	254279	NaN	NaN
Q13177	NECT2_HUMAN	NECTIN2	23	3	NaN	18.0938	18.312	NaN	18.2647	2	302590	32305.8	0.106764
P09668	NEDD4_HUMAN	NEDD4	29	4	NaN	18.7803	NaN	18.8217	20.084	2	456796	9270.28	0.0202941
P78527	NEDD8_HUMAN	NEDD8	12	1	NaN	NaN	NaN	NaN	17.7264	0
Q15019	NEK9_HUMAN	NEK9	11	2	NaN	NaN	NaN	17.9681	19.4074	1	256405	NaN	NaN
P13726	NELFA_HUMAN	NELFA	6	1	17.3853	NaN	17.8628	NaN	19.5955	2	204776	47492.5	0.231924
P53621	NELL2_HUMAN	NELL2	97	12	20.3883	19.7141	19.9002	20.269	20.4709	4	1118640	239387	0.213998
Q8IUI8	NEO1_HUMAN	NEO1	39	5	20.3304	20.461	20.5434	20.5567	20.8569	4	1458080	102854	0.0705408
Q96GK7	NEP1_HUMAN	EMG1	7	1	NaN	NaN	NaN	NaN	19.1592	0
Q13201	NET4_HUMAN	NTN4	25	3	NaN	NaN	NaN	NaN	17.956	0
O43930;P49137;P51817;Q16644;Q96PN8	NEUR1_HUMAN	NEU1	78	7	20.0391	19.8412	20.1782	19.7214	20.5365	4	1016900	143370	0.140988
Q99808	NFASC_HUMAN	NFASC	48	6	19.5328	19.4748	19.5897	19.5484	19.4498	4	760721	24991.7	0.0328526
Q9Y230	NGAL_HUMAN	LCN2	33	4	20.1089	20.1569	20.0948	20.0143	NaN	4	1119650	45612.1	0.0407377
P28799	NH2L1_HUMAN	SNU13	6	1	NaN	17.8775	17.5531	NaN	19.4099	2	216557	34291.9	0.158351
Q01995	NHLC2_HUMAN	NHLRC2	6	1	NaN	NaN	17.1415	NaN	17.1258	1	144583	NaN	NaN
P29373	NIBA1_HUMAN	NIBAN1	34	4	19.9526	19.8684	19.6838	19.7036	19.8241	4	916975	83139	0.0906667
P08670	NIBA2_HUMAN	NIBAN2	8	1	NaN	NaN	NaN	NaN	16.2523	0
P52848	NICA_HUMAN	NCSTN	24	3	18.9964	18.9726	18.8703	NaN	19.1736	3	505543	23202.9	0.045897
P25398	NID1_HUMAN	NID1	62	8	21.6299	21.7226	21.8434	21.6803	21.405	4	3457310	221852	0.064169
Q9BZG1	NIT2_HUMAN	NIT2	26	3	18.7263	18.8753	19.0414	18.6382	18.7081	4	465537	57850	0.124265
Q96EK6	NMT1_HUMAN	NMT1	13	2	18.0703	18.2022	18.1994	18.2672	19.05	4	298329	16788	0.0562735
Q9BYE9	NNRE_HUMAN	NAXE	8	1	NaN	NaN	NaN	NaN	18.3947	0
P55884	NOE2_HUMAN	OLFM2	10	1	18.1773	NaN	18.8662	NaN	18.5361	2	387138	128296	0.331395
P46459	NOMO1_HUMAN;NOMO2_HUMAN;NOMO3_HUMAN	NOMO1;NOMO2;NOMO3	11	2	NaN	NaN	NaN	NaN	18.4374	0
P06576	NONO_HUMAN	NONO	29	3	20.061	19.6141	NaN	18.9707	19.7211	3	803372	290052	0.361043
P09661	NOP2_HUMAN	NOP2	6	1	NaN	NaN	NaN	NaN	18.2532	0
Q96DG6	NOP56_HUMAN	NOP56	16	2	NaN	18.3866	18.5296	NaN	19.1949	2	360555	25251.3	0.0700346
P04350	NOTC1_HUMAN	NOTCH1	45	6	20.256	20.4464	20.4548	20.4491	20.2078	4	1387410	90201	0.0650139
Q01082	NOTC2_HUMAN	NOTCH2	105	7	20.228	20.1185	20.2226	20.2423	20.2874	4	1207560	46720	0.0386895
P78330	NOTC3_HUMAN	NOTCH3	90	9	20.6119	20.5217	20.6184	20.6436	20.3304	4	1588950	57791.5	0.0363709
P01112	NOTC4_HUMAN	NOTCH4	13	2	20.5824	20.7242	20.544	20.4156	19.5223	4	1557420	137522	0.088301
P38919	NP1L1_HUMAN	NAP1L1	63	6	20.1221	20.4552	20.2433	20.269	20.8314	4	1270860	123232	0.096967
P61006	NP1L4_HUMAN	NAP1L4	21	3	NaN	NaN	NaN	NaN	17.9665	0
Q9NR12	NPL_HUMAN	NPL	16	2	NaN	19.739	19.2814	19.5433	20.1841	3	758761	119022	0.156864
P40429	NPM_HUMAN	NPM1	37	4	19.8379	19.4688	NaN	19.6813	20.3952	3	834470	105912	0.126921
Q96QK1	NPTN_HUMAN	NPTN	10	1	NaN	18.7447	19.0496	NaN	20.5624	2	490943	73092.8	0.148883
Q15046	NPTX1_HUMAN	NPTX1	22	3	20.3787	20.225	20.2858	20.4845	20.3653	4	1333570	105572	0.0791648
P35221	NQO1_HUMAN	NQO1	12	2	19.9083	19.3155	18.7847	18.4737	18.736	4	613022	275208	0.448937
P08174	NQO2_HUMAN	NQO2	15	2	19.6644	19.9461	20.187	20.1066	NaN	4	1040950	159308	0.153041
P26196	NRBP_HUMAN	NRBP1	17	3	NaN	NaN	NaN	NaN	18.4766	0
Q9H1B5	NRCAM_HUMAN	NRCAM	60	7	19.561	19.2953	19.426	19.4724	19.6023	4	712168	54112.3	0.0759826
P17844	NRP1_HUMAN	NRP1	119	14	20.1862	20.5556	20.6402	20.5366	20.7428	4	1472360	192621	0.130825
P41252	NRP2_HUMAN	NRP2	128	14	20.1409	20.0734	20.1819	20.2232	21.2968	4	1168230	51393.9	0.0439928
P63167	NRX1A_HUMAN	NRXN1	82	10	19.8808	19.1048	19.53	19.7261	19.397	4	788371	172222	0.218452
P45974	NSF_HUMAN	NSF	63	8	19.1601	19.4096	19.5018	19.512	20.0998	4	693070	75107.9	0.10837
Q9Y3I0	NSF1C_HUMAN	NSFL1C	6	1	NaN	NaN	NaN	NaN	18.0057	0
Q05682	NSUN2_HUMAN	NSUN2	21	3	18.945	NaN	NaN	NaN	20.0467	1	504688	NaN	NaN
O15460	NTF2_HUMAN	NUTF2	59	5	20.1584	20.3872	20.3186	20.2933	20.3888	4	1283580	83951.1	0.065404
P30085	NTM1A_HUMAN	NTMT1	14	2	NaN	NaN	NaN	NaN	17.3057	0
P27701	NUBP2_HUMAN	NUBP2	15	2	18.9121	18.9863	19.1656	19.0038	19.2818	4	531587	40170.6	0.0755673
Q92905	NUCB1_HUMAN	NUCB1	81	8	18.9208	19.1614	19.4697	19.4782	21.3274	4	634754	113992	0.179584
Q9NP72	NUDC_HUMAN	NUDC	13	2	NaN	19.0686	NaN	NaN	20.4065	1	549834	NaN	NaN
P53634	NUDC1_HUMAN	NUDCD1	8	1	NaN	21.8469	NaN	NaN	NaN	1	3771910	NaN	NaN
P62304	NUDT3_HUMAN	NUDT3	20	3	19.1474	18.9379	18.7562	18.7975	19.5424	4	495320	62371.4	0.125921
Q6IBS0	NUDT5_HUMAN	NUDT5	9	1	NaN	NaN	NaN	NaN	19.3726	0
P46779	NUMA1_HUMAN	NUMA1	95	12	NaN	NaN	NaN	NaN	17.7714	0
O00203	OAF_HUMAN	OAF	12	2	20.3651	20.1979	19.9093	19.4164	21.0384	4	1059400	282997	0.267129
P53618	OARD1_HUMAN	OARD1	6	1	NaN	17.8302	17.5911	NaN	18.7274	2	215240	25170.9	0.116943
Q969P0	OBRG_HUMAN	LEPROT	6	1	NaN	NaN	NaN	NaN	17.0547	0
Q15942	OGFR_HUMAN	OGFR	7	1	NaN	NaN	NaN	NaN	18.7482	0
O43795	OIT3_HUMAN	OIT3	48	6	20.639	20.7327	20.7638	20.8065	20.9393	4	1747420	85098.5	0.0486994
Q7L576	OLA1_HUMAN	OLA1	67	9	19.8026	20.0063	20.0221	20.045	20.0877	4	1028550	76967.5	0.0748311
A0A024R6I7;A0A0G2JRN3	OLFL3_HUMAN	OLFML3	101	12	21.0907	21.3249	21.442	21.3977	21.7475	4	2617990	272301	0.104012
Q05707	OLM2A_HUMAN	OLFML2A	23	3	NaN	NaN	19.8359	NaN	20.6854	1	935855	NaN	NaN
P63010	OMD_HUMAN	OMD	13	2	21.7531	21.8563	22.0291	21.8982	22.5837	4	3879870	309214	0.079697
Q8WV92	OPTN_HUMAN	OPTN	6	1	19.036	NaN	19.2212	19.4866	19.977	3	627758	99571.8	0.158615
Q9UBT2	OSBL9_HUMAN	OSBPL9	5	1	NaN	NaN	18.2872	NaN	18.6176	1	319877	NaN	NaN
P10253	OSCAR_HUMAN	OSCAR	46	5	20.4536	20.8179	20.4521	20.4989	NaN	4	1550160	200062	0.129059
O00442	OSMR_HUMAN	OSMR	15	2	20.982	21.1772	21.1698	21.2303	21.5305	4	2315430	168952	0.0729678
Q86SF2	OSTF1_HUMAN	OSTF1	33	4	NaN	NaN	18.9217	NaN	18.9332	1	496607	NaN	NaN
Q13561	OTUB1_HUMAN	OTUB1	53	6	19.9517	20.1663	20.2774	20.1699	20.2283	4	1160310	106849	0.0920865
Q8WTV0	OXSR1_HUMAN	OXSR1	42	5	19.1078	19.846	19.3201	19.6555	20.0341	4	746934	169399	0.226793
P23468	P20D1_HUMAN	PM20D1	16	2	19.5261	19.7235	19.7287	19.9012	18.5351	4	867166	91506.6	0.105524
P55060	P3H1_HUMAN	P3H1	5	1	18.1857	NaN	17.9497	NaN	20.1003	2	275660	31823.6	0.115445
Q9UMD9	P4HA1_HUMAN	P4HA1	70	9	19.6686	19.9785	19.9851	20	20.6027	4	988216	103424	0.104657
Q06210	P4HA2_HUMAN	P4HA2	73	9	19.3614	19.2722	19.4747	19.3545	19.4267	4	676392	39322.4	0.0581356
O00410	P5CR2_HUMAN	PYCR2	6	1	19.2495	19.735	19.6896	19.4888	NaN	4	769310	113945	0.148114
P61313	P5CR3_HUMAN	PYCR3	9	1	NaN	NaN	NaN	NaN	19.4102	0
Q6UY14	PA1B2_HUMAN	PAFAH1B2	16	2	20.0882	20.5096	20.0503	20.2095	21.0673	4	1226440	185706	0.151419
Q99985	PA1B3_HUMAN	PAFAH1B3	6	1	21.1135	21.4573	21.5724	21.2388	22.2874	4	2685320	384345	0.143128
Q96IU4	PA24A_HUMAN	PLA2G4A	25	3	NaN	18.7223	18.9893	19.2991	19.2672	3	532652	106819	0.200541
P48507	PA2G4_HUMAN	PA2G4	75	8	19.4892	19.6867	19.365	19.3432	19.8913	4	730040	82109.4	0.112473
P27635	PA2GD_HUMAN	PLA2G2D	6	1	19.2948	18.895	18.9646	18.3503	18.792	4	494099	126673	0.256372
Q9Y3I1	PABP1_HUMAN	PABPC1	201	20	20.4531	20.3892	20.2107	19.7955	21.9107	4	1233040	234813	0.190434
P51512	PABP4_HUMAN	PABPC4	6	1	NaN	NaN	NaN	NaN	20.388	0
Q9H9H4	PACN2_HUMAN	PACSIN2	24	3	NaN	19.6921	18.8011	NaN	20.0497	2	651905	275981	0.423345
Q9UNF0	PACS1_HUMAN	PACS1	10	2	18.6888	19.6733	19.564	18.9157	18.0789	4	632068	204041	0.322816
P39019	PAFA_HUMAN	PLA2G7	23	3	22.7388	22.5362	22.4866	22.55	21.0273	4	6274840	496119	0.0790648
P14209	PAG15_HUMAN	PLA2G15	31	4	20.0562	20.1952	20.112	20.0654	NaN	4	1130280	50452.6	0.0446371
P47897	PAI1_HUMAN	SERPINE1	130	14	20.031	19.838	19.6292	19.4882	21.4667	4	888717	147497	0.165966
Q15833	PAI2_HUMAN	SERPINB2	83	10	20.0371	20.013	20.1258	20.6182	22.0117	4	1221890	261048	0.213642
P62195	PAIP1_HUMAN	PAIP1	17	2	NaN	19.63	19.8319	NaN	20.208	2	872303	86151	0.0987626
P49593	PAK2_HUMAN	PAK2	58	8	NaN	18.6428	19.3094	20.0299	19.6402	3	709852	334705	0.471514
Q9NWV4	PAPS2_HUMAN	PAPSS2	23	3	19.3458	19.4833	19.9016	NaN	19.1385	3	792887	164951	0.208039
P00568	PARK7_HUMAN	PARK7	38	5	20.0172	19.8047	20.092	19.7978	20.8772	4	1001520	104090	0.103932
P07384	PARP1_HUMAN	PARP1	50	6	NaN	18.6661	20.2014	20.4428	20.8121	3	1015650	530824	0.522645
P08754	PARVB_HUMAN	PARVB	108	9	19.911	20.4679	20.4688	20.529	21.4253	4	1350070	244582	0.181162
P62191	PAXI_HUMAN	PXN	10	1	17.6135	18.4519	NaN	18.3505	18.8454	3	297775	85086.4	0.28574
P49588	PBDC1_HUMAN	PBDC1	17	2	NaN	18.7079	18.6217	NaN	18.9271	2	415773	17550.9	0.0422127
Q9Y4D7	PBLD_HUMAN	PBLD	6	1	21.7675	21.5078	21.8132	21.5029	20.321	4	3302180	378632	0.114661
Q92879	PCBP1_HUMAN	PCBP1	37	4	19.6274	19.8172	19.8975	19.8175	20.7346	4	908580	70325.5	0.0774015
Q9Y376	PCBP2_HUMAN	PCBP2	72	8	20.3053	20.3353	20.4183	20.1817	21.6709	4	1302330	87615.3	0.0672756
O00232	PCD12_HUMAN	PCDH12	31	4	19.5114	19.8871	19.9264	20.037	20.571	4	947304	140714	0.148542
P46777	PCD16_HUMAN	DCHS1	21	3	NaN	18.7653	18.67	19.2334	19.6068	3	493009	107764	0.218584
P50995	PCD17_HUMAN	PCDH17	20	3	NaN	NaN	NaN	NaN	18.339	0
Q8NFJ5	PCD18_HUMAN	PCDH18	47	6	19.3795	19.4203	19.4737	19.8634	21.3979	4	766385	126389	0.164916
Q9HCK4	PCDG1_HUMAN;PCDG3_HUMAN	PCDHGA1;PCDHGA3	5	1	NaN	NaN	NaN	NaN	18.7776	0
P20073	PCDGI_HUMAN;PCDGJ_HUMAN	PCDHGB6;PCDHGB7	5	1	NaN	NaN	NaN	NaN	17.2792	0
P54652	PCDGK_HUMAN	PCDHGC3	37	5	20.9882	21.123	21.1917	21.2545	21.976	4	2315250	180273	0.0778632
P14780	PCDH1_HUMAN	PCDH1	20	3	NaN	NaN	19.3962	19.1056	21.1487	2	627040	89002.5	0.141941
O43157	PCNA_HUMAN	PCNA	33	4	19.137	19.8154	20.3913	NaN	19.5327	3	958130	400542	0.418046
Q02818	PCOC1_HUMAN	PCOLCE	19	2	19.849	20.5237	20.2712	20.3121	21.8557	4	1254790	232769	0.185505
Q7LDG7	PCOC2_HUMAN	PCOLCE2	11	2	21.9446	17.84	18.2781	18.0967	19.7162	4	1217270	1879630	1.54414
P55291	PCP_HUMAN	PRCP	57	7	19.7759	NaN	20.3423	20.204	21.6022	3	1144970	222601	0.194416
Q14204	PCSK5_HUMAN	PCSK5	11	1	NaN	19.2254	19.1117	19.351	18.9642	3	616049	51170.6	0.0830625
Q6VY07	PCYOX_HUMAN	PCYOX1	33	4	20.6677	20.7159	20.8091	20.984	20.3508	4	1824800	180792	0.0990753
O43447	PCYXL_HUMAN	PCYOX1L	26	3	20.932	21.1983	21.1061	21.1925	20.5909	4	2265130	189003	0.0834405
C9J0J7;G5E9Q6	PD1L2_HUMAN	PDCD1LG2	20	2	20.909	20.9901	21.0095	21.0991	NaN	4	2102270	114008	0.0542308
Q14152	PDC10_HUMAN	PDCD10	9	1	NaN	20.3084	20.2898	NaN	21.9428	2	1290170	11802.8	0.00914831
P52788	PDC6I_HUMAN	PDCD6IP	314	36	20.2303	20.2525	20.2798	19.6854	21.6799	4	1148820	204556	0.178058	+
Q96CV9	PDCD4_HUMAN	PDCD4	12	2	NaN	17.8493	NaN	NaN	18.2651	1	236142	NaN	NaN
P33176	PDCD6_HUMAN	PDCD6	63	7	20.6835	20.7404	20.6966	19.8158	22.3216	4	1514520	395494	0.261135
Q08174	PDE5A_HUMAN	PDE5A	81	11	19.476	20.2248	20.1491	19.9249	20.8542	4	1028170	221680	0.215606
Q9H2K8	PDGFC_HUMAN	PDGFC	9	1	18.594	NaN	NaN	NaN	18.3463	1	395680	NaN	NaN
P22413	PDIA1_HUMAN	P4HB	96	12	19.5266	19.6898	19.7306	19.5964	20.8459	4	815908	51737.4	0.0634108
Q06203	PDIA3_HUMAN	PDIA3	107	12	19.8461	20.1584	20.2358	20.2751	20.3062	4	1154090	146868	0.127259
P29144	PDIA4_HUMAN	PDIA4	15	2	19.7959	NaN	NaN	NaN	20.3795	1	910257	NaN	NaN
O00429	PDIA6_HUMAN	PDIA6	12	1	19.8409	20.4115	20.0186	NaN	20.4265	3	1131980	235703	0.208223
Q13444	PDLI1_HUMAN	PDLIM1	30	4	19.5041	19.7101	19.7037	19.6334	21.2103	4	817110	52999.7	0.0648625
P27708	PDLI5_HUMAN	PDLIM5	15	2	19.0319	18.4962	18.4363	19.3648	19.1518	4	483898	151668	0.313429
P35237	PDLI7_HUMAN	PDLIM7	12	2	19.0844	19.7243	19.2837	NaN	20.1039	3	686759	160736	0.23405
Q7L5N1	PDXD1_HUMAN	PDXDC1	10	1	NaN	20.5073	NaN	20.9358	18.7875	2	1748200	364499	0.2085
O00194;P51159	PEAR1_HUMAN	PEAR1	22	2	19.1761	18.9944	19.068	19.1917	19.1621	4	565756	36301.9	0.0641653
Q02763	PEBP1_HUMAN	PEBP1	41	5	21.4489	21.6302	21.8534	21.824	22.0167	4	3402540	432665	0.127159
Q92824	PEBP4_HUMAN	PEBP4	17	3	21.4717	21.6768	21.7401	21.4825	NaN	4	3173420	300092	0.0945642
P28062	PEDF_HUMAN	SERPINF1	69	5	24.766	24.88	24.9309	25.0268	25.409	4	31394100	2352440	0.0749326
P62312	PEF1_HUMAN	PEF1	25	4	NaN	NaN	19.3158	18.9168	18.2042	2	573736	111496	0.194333
P21291	PEG10_HUMAN	PEG10	7	1	NaN	NaN	NaN	NaN	19.0262	0
Q13576	PEPC_HUMAN	PGC	8	1	19.0024	19.2695	19.1379	19.2872	NaN	4	593440	53434	0.0900412
Q13867	PEPD_HUMAN	PEPD	207	16	22.6842	22.6459	22.7557	22.5959	20.3881	4	6681040	313498	0.0469236
P15559	PERM_HUMAN	MPO	6	1	NaN	NaN	NaN	NaN	17.0902	0
Q99956	PFD3_HUMAN	VBP1	17	2	18.9435	NaN	19.1852	19.0588	19.2743	3	548792	46037.9	0.0838895
P05413	PFKAL_HUMAN	PFKL	81	7	20.3409	20.7256	20.7967	20.8436	19.8245	4	1691290	249631	0.147599
Q92930	PFKAM_HUMAN	PFKM	6	1	NaN	NaN	NaN	NaN	18.3257	0
Q13464	PFKAP_HUMAN	PFKP	31	3	20.0822	19.8872	19.902	20.5815	20.3431	4	1157140	281982	0.243689
P49006	PGAM1_HUMAN	PGAM1	115	11	20.8761	20.9305	20.9675	20.8733	21.4231	4	1973590	62452.6	0.0316442
Q9GZZ9	PGAM4_HUMAN	PGAM4	16	1	19.9551	19.4834	19.7787	19.3813	21.0337	4	832943	153401	0.184167
Q6UWU2	PGBM_HUMAN	HSPG2	641	70	20.778	20.5433	20.6032	20.612	21.0147	4	1630420	116557	0.0714893
P04626	PGCA_HUMAN	ACAN	159	18	22.8048	22.4955	22.3769	22.1907	20.8159	4	5868540	1076570	0.183448
Q9UBP4	PGFRB_HUMAN	PDGFRB	38	5	19.4147	19.499	19.4863	19.5356	18.9626	4	733574	25530.9	0.0348034
P34059	PGK1_HUMAN	PGK1	165	19	21.5404	21.7704	21.8307	21.7824	21.0582	4	3491060	301354	0.0863218
Q8IZF2	PGM1_HUMAN	PGM1	152	17	21.0242	21.1508	21.2794	21.1847	20.5635	4	2347460	170265	0.0725316
O95297	PGM2_HUMAN	PGM2	46	5	20.208	20.1716	20.3291	20.293	20.4391	4	1248520	63214.3	0.0506313
Q99460	PGRP2_HUMAN	PGLYRP2	247	17	25.1478	25.1178	25.0776	24.9657	20.1045	4	35439400	1922990	0.0542614
O14960	PGS1_HUMAN	BGN	40	4	20.7299	21.0915	20.951	21.0224	20.4864	4	2032660	213183	0.104879
P67809	PGTA_HUMAN	RABGGTA	8	1	NaN	NaN	NaN	NaN	19.4514	0
O43291	PH4H_HUMAN	PAH	16	2	20.0241	20.524	20.4259	20.4934	19.8763	4	1364690	203232	0.148921
Q9H4A6	PHKG1_HUMAN;PHKG2_HUMAN	PHKG1;PHKG2	9	1	NaN	18.4598	NaN	NaN	18.8536	1	360531	NaN	NaN
P84090	PHLA2_HUMAN	PHLDA2	5	1	NaN	NaN	NaN	NaN	18.592	0
P61163	PHLD_HUMAN	GPLD1	141	17	21.5311	21.5588	21.5421	21.4201	NaN	4	2994820	128193	0.0428049
P36405	PHOCN_HUMAN	MOB4	20	2	18.6045	NaN	19.0015	18.4824	18.7574	3	429886	83810.7	0.19496
O43294	PHP14_HUMAN	PHPT1	6	1	18.0613	17.6541	NaN	18.8247	18.5131	3	314692	133857	0.425358
Q8IV08	PI16_HUMAN	PI16	138	9	23.1505	23.193	23.2506	23.0625	17.4594	4	9409980	512949	0.0545111
Q86X29	PI42A_HUMAN	PIP4K2A	55	6	19.3832	18.86	NaN	NaN	19.6453	2	579792	147070	0.25366
Q14254	PIBF1_HUMAN	PIBF1	6	1	20.8738	20.4515	20.7084	20.7823	NaN	4	1718030	207722	0.120907
P31948	PICAL_HUMAN	PICALM	22	3	NaN	18.7944	NaN	NaN	18.6155	1	454666	NaN	NaN
Q9NZN4	PIMT_HUMAN	PCMT1	43	6	20.3586	20.6865	20.753	20.7429	21.0428	4	1638480	199113	0.121523
O75531	PIP_HUMAN	PIP	28	4	20.728	20.5229	20.9354	21.2714	19.1365	4	1945000	440760	0.226612
P20142	PIPNB_HUMAN	PITPNB	11	1	19.7858	NaN	19.3388	19.4034	17.6868	3	753476	131166	0.174081
P50135	PK3CG_HUMAN	PIK3CG	29	4	NaN	18.5527	18.6983	18.6194	19.5671	3	404195	20466.3	0.0506347
O60749	PKD1_HUMAN	PKD1	7	1	20.0482	20.0865	20.1763	20.1195	19.328	4	1130390	42711.3	0.0377845
O00303	PKDCC_HUMAN	PKDCC	16	2	19.4822	19.5058	19.6607	19.6885	19.8843	4	787637	57466.2	0.0729603
O15335	PKHB2_HUMAN	PLEKHB2	5	1	NaN	NaN	NaN	NaN	19.0804	0
Q9NY97	PKHL1_HUMAN	PKHD1L1	208	22	20.236	20.4507	20.487	20.5259	20.2324	4	1411850	122058	0.0864526
O43491	PKN1_HUMAN	PKN1	5	1	NaN	NaN	NaN	NaN	16.5561	0
O14980	PKP3_HUMAN	PKP3	27	4	NaN	18.2032	NaN	NaN	20.3123	1	301785	NaN	NaN
O95084	PLA1A_HUMAN	PLA1A	6	1	22.5369	22.6189	22.7862	22.7582	23.02	4	6713440	542878	0.0808643
Q06323	PLAK_HUMAN	JUP	121	14	19.8003	19.2284	19.6539	19.3116	20.9229	4	750709	141998	0.189152
P61077	PLBL2_HUMAN	PLBD2	18	3	19.8931	19.7915	19.6937	19.555	21.4006	4	874866	86601.5	0.0989883
P33993	PLCB3_HUMAN	PLCB3	17	2	NaN	NaN	19.562	NaN	20.7927	1	774023	NaN	NaN
P54136	PLD3_HUMAN	PLD3	8	1	19.1829	19.5549	18.5106	19.3185	19.5763	4	598170	166536	0.278409
P0C0S5;Q71UI9	PLD4_HUMAN	PLD4	16	2	19.6012	19.7121	19.5469	19.5154	NaN	4	792394	48243.5	0.0608832
Q8IZA0	PLEC_HUMAN	PLEC	622	83	19.9521	19.6119	19.7905	19.8912	21.2889	4	923720	92839.3	0.100506
P62318	PLEK_HUMAN	PLEK	12	1	19.5824	19.9577	19.9449	20.0564	21.3904	4	975734	132211	0.135499
Q9H173	PLOD1_HUMAN	PLOD1	124	16	20.0465	20.1906	20.1976	20.0014	21.3598	4	1132940	78199.1	0.0690233
P20933	PLOD2_HUMAN	PLOD2	163	20	19.7148	19.5347	19.6462	19.1115	22.3287	4	751726	130337	0.173384
Q9H6X2	PLOD3_HUMAN	PLOD3	100	13	19.7406	19.1605	19.7091	19.4213	21.1791	4	755299	137161	0.181599
Q9UNH7	PLP2_HUMAN	PLP2	6	1	20.0994	19.6181	19.8159	NaN	20.0192	3	950327	161082	0.169502
P48426	PLPP_HUMAN	PDXP	19	2	19.5119	18.3482	18.7735	18.5174	18.2782	4	476156	187026	0.392783
Q14103	PLS1_HUMAN	PLSCR1	6	1	NaN	NaN	NaN	NaN	19.1943	0
Q07812	PLS3_HUMAN	PLSCR3	29	4	19.8142	20.2345	20.1713	19.9698	23.3233	4	1090780	142756	0.130875
Q14203	PLSI_HUMAN	PLS1	28	3	18.5849	18.5298	18.7557	18.7049	19.23	4	410400	29666.7	0.0722874
O60610	PLSL_HUMAN	LCP1	62	8	19.881	20.0616	20.031	20.1042	19.6598	4	1064580	69870.4	0.0656318
Q92598	PLST_HUMAN	PLS3	60	8	19.397	19.4812	19.5732	19.6849	19.9337	4	761276	65565.3	0.0861255
Q00973	PLTP_HUMAN	PLTP	147	13	23.2285	23.3444	23.3282	23.217	21.4051	4	10190000	466640	0.0457941
Q5ZPR3	PLVAP_HUMAN	PLVAP	29	3	19.1009	19.881	19.9312	20.0342	23.0702	4	900324	229859	0.255307
Q8WWI5	PLXA1_HUMAN	PLXNA1	123	15	19.5127	19.5869	19.6633	19.5091	20.5101	4	777996	39755.6	0.0511
Q9UBV8	PLXA3_HUMAN	PLXNA3	12	2	NaN	NaN	NaN	NaN	18.9851	0
Q9P2R3	PLXB1_HUMAN	PLXNB1	17	2	19.2913	19.2108	19.1268	19.4692	19.9688	4	636661	65794	0.103342
O60506	PLXB2_HUMAN	PLXNB2	61	6	20.7681	20.8021	20.958	21.0708	21.5295	4	1963430	193632	0.0986195
Q9Y371	PLXD1_HUMAN	PLXND1	30	3	18.9021	19.4454	19.2791	19.5072	19.9855	4	646290	113889	0.17622
P12107	PMGE_HUMAN	BPGM	74	8	20.9371	21.171	21.2198	21.0927	19.8258	4	2261790	189408	0.0837426
Q8IW52	PMM2_HUMAN	PMM2	12	2	20.2197	20.3678	20.3177	20.2413	20.3158	4	1280130	61036.8	0.0476802
Q6PCB0	PNPH_HUMAN	PNP	33	4	21.0016	20.982	21.0731	21.0646	20.4212	4	2142460	67208.6	0.0313699
O95373	PNPO_HUMAN	PNPO	10	1	19.3588	19.4716	19.5526	19.5795	19.533	4	737943	49867.5	0.0675764
P05026	PON1_HUMAN	PON1	50	7	20.8333	20.9265	20.8905	20.7292	NaN	4	1885840	110979	0.0588486
Q16774	POSTN_HUMAN	POSTN	205	20	20.8232	20.7351	20.8406	21.1852	21.6423	4	1965690	285060	0.145018
Q7KZF4	PP1A_HUMAN	PPP1CA	107	12	19.7257	19.6527	19.4818	19.4421	20.6097	4	783930	73811.4	0.0941555
Q15904	PP1B_HUMAN	PPP1CB	22	2	19.9422	20.0109	20.0046	20.0385	19.9889	4	1048190	29310.5	0.0279629
Q5VY43	PP1R7_HUMAN	PPP1R7	41	5	19.7624	19.7158	19.7432	19.8945	20.3754	4	900685	50643.4	0.0562276
Q13347	PP2AA_HUMAN	PPP2CA	52	7	20.5179	20.7375	20.5517	20.6403	20.9102	4	1605280	110680	0.0689476
P05771;P17252	PP2BA_HUMAN	PPP3CA	27	3	19.9825	19.6282	19.5424	19.6826	20.4704	4	862828	119761	0.138801
P31327	PP6R3_HUMAN	PPP6R3	30	4	NaN	18.956	18.6846	19.0549	19.0442	3	491498	63381.5	0.128956
Q8IWT0	PPAC_HUMAN	ACP1	17	2	21.0443	21.1258	21.025	21.1004	21.2721	4	2208210	72170	0.0326826
Q15181	PPBT_HUMAN	ALPL	29	4	20.4935	20.7197	20.7237	20.6465	20.1849	4	1644000	119286	0.0725584
P49419	PPCE_HUMAN	PREP	60	8	19.4489	19.8202	19.8407	19.7586	19.7593	4	866834	103164	0.119012
Q8IUR7	PPCS_HUMAN	PPCS	8	1	NaN	NaN	NaN	NaN	17.6773	0
O75351	PPGB_HUMAN	CTSA	51	5	19.9472	20.1286	20.2464	20.0083	21.472	4	1113930	103402	0.0928265
P62070	PPIA_HUMAN	PPIA	125	11	21.2895	21.6188	21.8013	21.594	22.2171	4	3150890	448797	0.142435
O75023	PPIB_HUMAN	PPIB	52	7	19.8026	20.0282	19.8955	19.7864	19.4054	4	965836	75767.3	0.0784474
P51692	PPIC_HUMAN	PPIC	7	1	21.6827	22.1239	22.2051	21.9588	21.7109	4	4212010	645598	0.153276
P49354	PPID_HUMAN	PPID	12	2	19.4258	19.6745	19.8816	20.0296	19.6087	4	894334	158656	0.177401
P15529	PPIE_HUMAN	PPIE	12	1	22.2236	22.8185	22.7028	22.6637	22.6123	4	6441430	1077990	0.167352
Q9Y2V2	PPIH_HUMAN	PPIH	17	2	19.1614	19.3463	19.3498	19.2072	20.3312	4	631561	42016.4	0.0665278
Q08722	PPM1A_HUMAN	PPM1A	12	2	19.3809	19.8522	20.1078	19.8304	20.3865	4	922843	183659	0.199014
P20042	PPM1F_HUMAN	PPM1F	10	1	19.1901	19.2234	19.3628	19.4449	19.0989	4	649517	54060.4	0.0832317
Q96M27	PPME1_HUMAN	PPME1	17	3	19.706	19.8027	19.8263	19.7212	20.6704	4	890933	36685.7	0.0411768
P07902	PPP5_HUMAN	PPP5C	15	2	NaN	NaN	NaN	NaN	17.6308	0
P60228	PPP6_HUMAN	PPP6C	12	2	NaN	17.7652	NaN	NaN	19.0559	1	222767	NaN	NaN
Q9Y266	PPR3D_HUMAN	PPP1R3D	11	1	NaN	NaN	NaN	NaN	17.3108	0
Q9Y219	PPT1_HUMAN	PPT1	106	8	19.4994	19.3665	19.8646	19.2577	21.3002	4	749633	144463	0.192711
Q13275	PPT2_HUMAN	PPT2	6	1	NaN	NaN	NaN	NaN	19.1165	0
Q9P260	PRDX1_HUMAN	PRDX1	69	8	20.7029	20.4192	20.6252	20.4849	21.9548	4	1548490	138806	0.0896396
Q92526	PRDX2_HUMAN	PRDX2	44	4	20.5426	20.6791	20.815	20.9447	20.4913	4	1767310	211647	0.119756
P62310	PRDX3_HUMAN	PRDX3	14	2	NaN	NaN	17.5545	NaN	19.3458	1	192503	NaN	NaN
Q7Z7M0	PRDX4_HUMAN	PRDX4	36	4	19.6386	19.8612	19.7651	20.062	19.9038	4	938575	118008	0.125731
O00159	PRDX5_HUMAN	PRDX5	8	1	20.7594	21.1308	21.0057	21.2098	20.9023	4	2150500	282753	0.131482
P61758	PRDX6_HUMAN	PRDX6	83	11	20.53	20.7397	20.73	20.6823	22.1476	4	1671710	109249	0.0653517
O00499;P49418;Q9UBW5	PRG4_HUMAN	PRG4	65	8	22.0787	22.3068	21.9172	21.7727	22.2472	4	4290230	691578	0.161198
Q99627	PRIO_HUMAN	PRNP	15	2	NaN	NaN	17.8444	NaN	20.6442	1	235349	NaN	NaN
P04083	PRKDC_HUMAN	PRKDC	361	48	19.7674	19.7427	18.9808	19.0595	20.8967	4	708366	204245	0.288332
Q16674	PROF1_HUMAN	PFN1	76	7	22.2323	22.3649	22.4803	22.341	22.4381	4	5373110	379404	0.0706116
O14792	PROF2_HUMAN	PFN2	8	1	18.5108	NaN	NaN	NaN	20.2607	1	373509	NaN	NaN
Q9Y613	PROZ_HUMAN	PROZ	19	2	20.4382	20.1916	20.1172	20.1484	NaN	4	1229430	129894	0.105654
Q9Y5K8	PRPS1_HUMAN	PRPS1	40	5	19.4728	19.6286	19.6528	19.5213	19.604	4	778735	46165.9	0.0592832
O43865	PRRC1_HUMAN	PRRC1	17	2	19.1077	19.0101	19.0837	19.1133	19.2198	4	553902	17984.8	0.0324693
P26640	PRS10_HUMAN	PSMC6	60	8	19.4528	19.7582	19.7004	19.6032	19.9086	4	813182	73775.7	0.0907247
P83731	PRS23_HUMAN	PRSS23	59	7	19.4881	19.372	19.0535	18.5724	22.5417	4	586946	153971	0.262326
O14602;P47813	PRS4_HUMAN	PSMC1	94	9	19.1031	19.4248	19.2908	19.3768	19.851	4	647266	61734.4	0.0953771
Q9NSD9	PRS6A_HUMAN	PSMC3	76	9	19.8077	20.1965	20.2671	20.1311	20.2663	4	1132360	150431	0.132848
Q5D862	PRS6B_HUMAN	PSMC4	25	3	18.8269	19.0624	19.2762	18.9399	18.6728	4	537562	73125.8	0.136032
P43686	PRS7_HUMAN	PSMC2	106	15	19.62	19.8017	19.7774	19.6417	20.0485	4	859084	55080.5	0.0641155
P19022	PRS8_HUMAN	PSMC5	132	15	18.9525	19.5357	19.4017	19.2865	19.7716	4	649852	107078	0.164772
O43592	PRTN3_HUMAN	PRTN3	15	2	20.1244	20.6623	20.4615	20.4	NaN	4	1407470	212377	0.150892
P07093	PSA_HUMAN	NPEPPS	115	14	19.4329	19.6357	19.614	19.5193	20.1779	4	769051	49174	0.0639411
Q9Y5X1	PSA1_HUMAN	PSMA1	102	10	20.3763	20.0779	20.1305	20.1911	20.2284	4	1203180	111543	0.092707
P61966	PSA2_HUMAN	PSMA2	37	5	20.4686	20.2002	20.4513	20.4736	20.542	4	1386350	121482	0.0876271
P18850	PSA3_HUMAN	PSMA3	29	5	20.7927	20.3667	20.6046	20.6684	20.6198	4	1607350	193702	0.12051
Q6NUS6	PSA4_HUMAN	PSMA4	57	7	20.8605	20.644	20.6489	20.8077	20.6422	4	1755510	134732	0.076748
O95045	PSA5_HUMAN	PSMA5	53	7	20.7314	20.5699	20.6309	20.772	20.5839	4	1677930	106981	0.0637576
P47712	PSA6_HUMAN	PSMA6	80	10	20.7268	20.4024	20.5311	20.6561	20.5025	4	1572220	153833	0.0978444
P15586	PSA7_HUMAN	PSMA7	94	11	20.3961	20.3537	20.4083	20.5067	20.4501	4	1400290	63660.8	0.0454625
Q9Y5Y2	PSB1_HUMAN	PSMB1	37	4	21.414	21.2143	21.2576	21.2399	20.8577	4	2552700	163800	0.0641675
Q9Y315	PSB2_HUMAN	PSMB2	28	4	21.0837	20.8637	20.8803	21.0848	21.01	4	2071180	175845	0.0849008
Q96AC1	PSB3_HUMAN	PSMB3	50	5	20.5649	20.4344	20.3503	20.5622	20.0754	4	1463280	105016	0.0717678
Q99805	PSB4_HUMAN	PSMB4	23	3	21.21	20.7992	20.8019	21.0516	20.5107	4	2063000	292023	0.141552
P13716	PSB5_HUMAN	PSMB5	54	6	20.4362	20.1333	20.0925	20.3203	20.1021	4	1249010	140712	0.112659
Q16531	PSB6_HUMAN	PSMB6	30	4	21.5687	21.288	21.4487	21.6185	21.2073	4	2938200	292855	0.0996715
Q14315	PSB7_HUMAN	PSMB7	33	4	20.9381	20.6991	20.8431	21.0058	20.6929	4	1924530	174337	0.090587
Q9NR19	PSB8_HUMAN	PSMB8	12	1	NaN	19.3624	19.0884	NaN	18.7361	2	615699	82444.3	0.133903
Q5VZF2;Q9NR56;Q9NUK0	PSB9_HUMAN	PSMB9	6	1	19.9931	19.7143	20.2219	20.0585	20.1908	4	1054660	150171	0.142389
P52790	PSD10_HUMAN	PSMD10	12	2	18.4437	19.2099	19.1583	18.5556	19.1999	4	483333	130624	0.270256
P06280	PSD11_HUMAN	PSMD11	90	11	19.6776	19.9628	19.9875	19.9473	20.002	4	977724	93521	0.0956517
Q9NS98	PSD12_HUMAN	PSMD12	37	4	19.1619	19.33	19.4281	19.2664	19.8653	4	645395	49893.7	0.0773073
O00161	PSD13_HUMAN	PSMD13	49	7	19.5686	19.814	19.626	19.7293	20.4433	4	844401	64055.6	0.0758593
Q9UIA9	PSDE_HUMAN	PSMD14	12	2	20.6947	20.6721	20.6317	20.7117	21.2611	4	1677500	40002.4	0.0238465
Q6UXK5	PSG11_HUMAN;PSG2_HUMAN;PSG3_HUMAN	PSG11;PSG2;PSG3	3	1	NaN	NaN	NaN	NaN	16.2731	0
P98095	PSMD1_HUMAN	PSMD1	104	12	19.078	19.3053	19.3211	19.1276	19.5679	4	607259	51696.9	0.0851317
Q15043	PSMD2_HUMAN	PSMD2	86	11	19.5453	19.7423	19.6635	19.6193	19.9726	4	819490	46861.7	0.057184
O43809	PSMD3_HUMAN	PSMD3	51	7	19.3197	19.5345	19.5006	19.6402	19.7074	4	743143	67384.9	0.0906755
Q9UJ70	PSMD4_HUMAN	PSMD4	10	1	NaN	NaN	NaN	NaN	19.6839	0
P50851	PSMD5_HUMAN	PSMD5	56	8	19.8266	20.3722	20.3747	20.1939	20.2655	4	1211510	202203	0.166901
Q8IUK8	PSMD6_HUMAN	PSMD6	49	5	18.8501	19.065	18.7453	18.9238	19.5352	4	489432	45940.8	0.0938655
Q6ZNJ1	PSMD7_HUMAN	PSMD7	31	4	19.51	19.947	20.0818	19.9047	20.0412	4	962166	153821	0.159869
Q92542	PSMD8_HUMAN	PSMD8	12	2	19.6402	19.7471	19.7103	19.9936	19.9809	4	899717	99624.3	0.110729
Q8N1N4	PSME1_HUMAN	PSME1	27	3	NaN	19.2387	19.1059	19.1331	19.5821	3	585933	28800	0.0491523
Q08J23	PSME2_HUMAN	PSME2	18	2	NaN	NaN	NaN	NaN	18.5108	0
Q70J99	PSPB_HUMAN	SFTPB	18	2	20.6004	20.8662	20.6313	20.5378	19.72	4	1661890	171619	0.103267
O43747	PTBP1_HUMAN	PTBP1	26	4	NaN	18.5292	18.5008	NaN	19.8173	2	374618	5224.26	0.0139456
Q9Y4E8	PTGDS_HUMAN	PTGDS	35	4	22.8391	22.8066	22.9426	22.768	NaN	4	7510770	395450	0.0526511
Q8NBI5	PTGR1_HUMAN	PTGR1	16	1	20.0441	19.319	19.8268	19.9531	19.5608	4	920047	187832	0.204155
Q9UNF1	PTGR2_HUMAN	PTGR2	8	1	20.2857	20.7086	20.9	20.7529	19.9469	4	1678920	286760	0.1708
Q9P2J5	PTK7_HUMAN	PTK7	65	9	20.3811	20.4808	20.5871	20.5655	21.119	4	1488970	95322.3	0.0640188
P07948	PTN11_HUMAN	PTPN11	92	10	19.5784	19.8305	19.8458	19.6972	20.5423	4	876877	75089.3	0.0856326
Q96D15	PTN23_HUMAN	PTPN23	34	4	18.5168	NaN	18.6745	NaN	20.4712	2	396732	30629	0.0772033
Q9NZ08	PTN6_HUMAN	PTPN6	21	3	NaN	17.9686	NaN	NaN	19.3878	1	256508	NaN	NaN
Q96IJ6	PTN7_HUMAN	PTPN7	7	1	NaN	17.6089	NaN	NaN	17.83	1	199898	NaN	NaN
Q10567	PTPA_HUMAN	PTPA	23	3	20.4493	20.5534	20.4973	20.5807	20.8353	4	1504700	60916.9	0.0404844
Q9ULC4	PTPRD_HUMAN	PTPRD	132	15	19.0708	19.387	19.4343	19.3961	19.7031	4	658662	72674.2	0.110336
Q92882	PTPRE_HUMAN	PTPRE	7	1	NaN	NaN	NaN	NaN	17.8494	0
Q15286	PTPRF_HUMAN	PTPRF	192	24	20.2345	20.4194	20.4026	20.4572	21.1852	4	1365400	90645.7	0.0663878
Q13217	PTPRG_HUMAN	PTPRG	44	7	21.4332	21.3552	21.3296	21.418	20.042	4	2737910	93875.1	0.0342871
Q9Y6Q5	PTPRJ_HUMAN	PTPRJ	74	8	21.3394	21.3411	21.3563	21.3403	19.6516	4	2662420	14893.3	0.00559392
P43243	PTPRK_HUMAN	PTPRK	51	7	20.275	19.9167	20.0616	20.2069	20.7958	4	1140800	124084	0.10877
O95989	PTPRM_HUMAN	PTPRM	68	8	19.8596	19.8752	20.0851	20.0738	20.0599	4	1032240	87614.5	0.0848783
Q9UNK4	PTPRS_HUMAN	PTPRS	77	10	19.5296	19.5093	19.6267	19.6736	20.0222	4	787230	42843.2	0.0544228
Q9Y285	PTPRZ_HUMAN	PTPRZ1	51	7	20.6153	20.1041	19.99	20.0046	19.8854	4	1206650	269146	0.223052
Q96JQ0	PTTG_HUMAN	PTTG1IP	10	1	NaN	NaN	NaN	NaN	19.3693	0
Q5H9R7	PTX3_HUMAN	PTX3	152	14	22.3302	22.4714	22.2352	21.5089	20.0251	4	4752320	1233030	0.259459
Q9Y639	PUF60_HUMAN	PUF60	8	1	NaN	NaN	NaN	19.902	17.9317	1	979688	NaN	NaN
Q9NYQ8	PUR1_HUMAN	PPAT	6	1	19.2671	19.3782	19.0199	19.321	20.0404	4	624705	65427.8	0.104734
P36551	PUR2_HUMAN	GART	34	4	19.6693	20	20.0202	19.9806	20.4064	4	995067	108166	0.108702
Q6UXN9	PUR4_HUMAN	PFAS	40	5	19.7441	20.4457	20.4959	20.5548	20.1592	4	1331330	305585	0.229534
Q15008	PUR6_HUMAN	PAICS	74	10	19.8939	19.7892	19.9557	19.8198	19.9537	4	955637	49876.7	0.0521921
P32969	PUR8_HUMAN	ADSL	34	4	19.8698	20.5936	20.5064	20.4653	20.538	4	1369410	279926	0.204414
P14866	PUR9_HUMAN	ATIC	107	12	20.0351	20.5705	20.5222	20.5569	20.5609	4	1420020	231436	0.162981
O95460	PURB_HUMAN	PURB	26	4	NaN	NaN	NaN	NaN	17.5022	0
H0Y8H4	PVR_HUMAN	PVR	39	6	21.3188	21.3022	21.3617	21.2917	18.7722	4	2615890	56275.2	0.0215128
Q04637	PXDC2_HUMAN	PLXDC2	171	14	22.4056	22.398	22.4888	22.3943	19.7161	4	5620290	178029	0.0316761
Q96HC4	PXDN_HUMAN	PXDN	232	28	19.1161	20.1202	20.2159	19.7593	21.9931	4	953306	292879	0.307225
P46926;Q8TDQ7	PXL2B_HUMAN	PRXL2B	6	1	NaN	NaN	NaN	NaN	19.7232	0
O75832	PYGB_HUMAN	PYGB	92	11	19.4336	19.9345	19.8559	19.8152	20.1944	4	895391	129159	0.144249
P42566	PYGL_HUMAN	PYGL	184	20	20.0656	20.459	20.53	20.5605	20.9138	4	1399800	206357	0.14742
Q9UQB8	PYR1_HUMAN	CAD	32	4	19.4947	19.5042	18.9956	18.8301	19.8368	4	617772	144386	0.233721
Q86UP2	PYRG1_HUMAN	CTPS1	9	1	22.5406	21.9668	22.0482	22.5675	18.6759	4	5188100	1125530	0.216945
Q9Y5Z4	PYRG2_HUMAN	CTPS2	18	3	18.6403	18.8408	18.898	19.0171	19.261	4	474284	50685.7	0.106868
Q13263	PZP_HUMAN	PZP	47	3	25.5226	25.422	25.4934	25.794	25.1228	4	49643100	5849840	0.117838
Q86TH1	Q5JXI8_HUMAN	FHL1	18	2	NaN	NaN	NaN	NaN	19.1252	0
P14678;P63162	Q5SRP5_HUMAN	APOM	15	1	19.7621	22.4906	19.881	19.9188	NaN	4	2184740	2472570	1.13175
Q9NT62	Q5T0I0_HUMAN	GSN	42	2	19.772	19.5077	19.336	19.8114	21.6478	4	805647	123089	0.152783
P55196	QOR_HUMAN	CRYZ	30	4	20.5015	20.1617	20.2827	20.3496	20.0797	4	1317270	130206	0.0988455
Q86XX4	QPCT_HUMAN	QPCT	23	2	19.7234	19.8711	19.9952	19.9481	20.1597	4	970307	78257.6	0.0806525
Q96GD0	QSOX1_HUMAN	QSOX1	161	17	21.2704	21.3998	21.3705	21.1539	19.5569	4	2585170	196161	0.0758793
P08253	QSOX2_HUMAN	QSOX2	35	5	19.4586	19.5043	19.5127	19.8193	19.6028	4	784325	94653.4	0.120681
Q9Y6E2	R4GN18_HUMAN	CD46	9	1	NaN	NaN	NaN	NaN	18.187	0
P63208	R4RL2_HUMAN	RTN4RL2	26	3	20.2543	20.29	20.3028	20.1966	NaN	4	1256970	41074.1	0.0326771
Q9NRF8	RAB10_HUMAN	RAB10	33	3	19.6854	19.9089	19.9776	19.6635	20.6695	4	922595	101141	0.109626
P62753	RAB14_HUMAN	RAB14	35	4	20.0155	20.2907	20.1825	20.1624	20.6735	4	1176500	91396.6	0.0776851
O75197	RAB18_HUMAN	RAB18	32	4	19.3185	19.4109	19.4026	19.3203	19.3222	4	674633	23632.2	0.0350297
A6NHL2	RAB1A_HUMAN	RAB1A	82	10	20.9602	21.165	21.1486	21.0117	21.379	4	2207550	153977	0.0697502
Q04695	RAB1B_HUMAN	RAB1B	24	2	19.4078	19.2619	19.7877	19.6265	20.1258	4	759681	122331	0.16103
Q04609;Q9HBA9;Q9Y3Q0	RAB21_HUMAN	RAB21	83	6	19.9063	19.7834	19.8073	19.6058	20.6597	4	900095	76518.7	0.0850118
P01031	RAB25_HUMAN	RAB25	16	2	NaN	NaN	NaN	NaN	17.4753	0
P20338	RAB2A_HUMAN	RAB2A	48	5	20.1419	20.0592	20.1226	20.0247	20.1826	4	1114420	42038.6	0.0377223
P22455	RAB34_HUMAN	RAB34	26	3	19.5344	19.5076	19.1778	NaN	18.5951	3	699251	92247.8	0.131924
Q9Y678	RAB35_HUMAN	RAB35	37	5	NaN	19.1392	18.6632	NaN	20.3282	2	496273	114743	0.23121
P40926	RAB3A_HUMAN;RAB3D_HUMAN	RAB3A;RAB3D	8	1	NaN	NaN	NaN	NaN	18.201	0
P13010	RAB4A_HUMAN	RAB4A	30	3	18.8393	NaN	NaN	NaN	19.2216	1	469010	NaN	NaN
Q9UNW1	RAB5A_HUMAN	RAB5A	43	5	19.7203	19.6478	19.8107	19.976	20.0553	4	909042	90893.7	0.0999884
Q9NQR4	RAB5B_HUMAN	RAB5B	31	4	19.9922	20.1416	20.2896	20.3906	19.9252	4	1214010	144831	0.1193
P34096	RAB5C_HUMAN	RAB5C	53	6	20.433	20.3012	20.2976	20.0872	21.0629	4	1277580	124063	0.0971077
P46109	RAB6A_HUMAN	RAB6A	38	5	20.1425	20.29	20.2451	20.1553	20.8281	4	1212470	59954.4	0.0494482
P51812	RAB7A_HUMAN	RAB7A	86	10	20.4926	20.399	20.4425	20.0096	21.4078	4	1334620	189829	0.142235
Q9UI30	RAB8A_HUMAN	RAB8A	32	4	19.3468	19.359	19.4599	19.3894	20.1127	4	686764	24417.9	0.035555
P31943	RAB8B_HUMAN	RAB8B	16	2	19.3821	NaN	19.2283	19.0308	19.7823	3	611023	73890	0.120928
Q99941	RABP2_HUMAN	CRABP2	6	1	19.2748	19.631	19.5271	19.1971	20.2224	4	700696	99513	0.14202
O95967	RAC1_HUMAN	RAC1	41	5	21.6251	21.667	21.6778	21.365	22.8425	4	3155000	307218	0.0973747
Q96J02	RAC2_HUMAN	RAC2	6	1	19.9694	19.6756	20.2483	19.5742	21.2472	4	972521	210191	0.21613
P46934	RACK1_HUMAN	RACK1	94	12	20.8421	20.5465	20.2783	20.3331	20.9519	4	1500970	276530	0.184234
P46778	RAI3_HUMAN	GPRC5A	44	4	NaN	19.2887	NaN	NaN	23.2556	1	640421	NaN	NaN
Q8IXJ6	RALA_HUMAN	RALA	6	1	NaN	NaN	NaN	NaN	19.7419	0
P29992	RALB_HUMAN	RALB	20	3	20.5468	20.6764	20.611	19.9931	22.268	4	1463160	285844	0.195361
Q16576	RAN_HUMAN	RAN	116	11	20.8731	20.9391	20.8357	20.7832	21.2786	4	1901740	86645.7	0.0455613
Q13492	RANG_HUMAN	RANBP1	9	1	NaN	20.2399	20.2256	19.9286	20.7242	3	1154080	135382	0.117307
O95219	RAP1A_HUMAN	RAP1A	11	1	18.2698	18.4007	18.6867	NaN	20.2402	3	361351	54577.1	0.151036
P62942	RAP1B_HUMAN	RAP1B	97	8	21.8672	22.0536	22.1153	21.9539	22.8915	4	4196010	316439	0.0754143
Q9BQA1	RAP2B_HUMAN	RAP2B	13	2	19.9827	19.7115	20.145	18.9775	21.7608	4	892568	279675	0.313338
Q96EY5	RAP2C_HUMAN	RAP2C	20	3	19.5629	19.8911	19.3803	19.4266	20.5716	4	783477	131874	0.168319
O43143	RASA1_HUMAN	RASA1	14	2	18.3922	18.8777	18.7464	18.7287	19.3894	4	424971	57946.2	0.136353
Q9UQ16	RASH_HUMAN	HRAS	21	3	19.614	19.5037	19.5492	18.7423	21.2525	4	687878	167993	0.244219
A0AVT1	RASK_HUMAN	KRAS	57	6	21.233	21.0248	21.0074	19.8887	21.8781	4	1919260	652901	0.340184
P01860	RB11A_HUMAN;RB11B_HUMAN	RAB11A;RAB11B	46	6	21.1033	21.2675	21.2519	21.2672	21.823	4	2449590	131775	0.053795
Q16186	RB27A_HUMAN;RB27B_HUMAN	RAB27A;RAB27B	14	2	18.8624	19.5094	19.3306	19.1612	20.4067	4	617129	114272	0.185168
Q13619	RB33B_HUMAN	RAB33B	6	1	NaN	NaN	23.018	22.7349	23.1584	2	7737340	1070370	0.138338
O60884	RBBP7_HUMAN	RBBP7	27	3	18.9021	18.9362	18.9045	18.3658	19.6561	4	454999	78308.6	0.172107
Q14344	RBGP1_HUMAN	RABGAP1	6	1	NaN	NaN	NaN	NaN	17.7631	0
O15498	RCC1_HUMAN	RCC1	30	4	NaN	NaN	NaN	NaN	18.0565	0
Q96MM7	RCC2_HUMAN	RCC2	13	2	16.8973	NaN	NaN	NaN	19.6448	1	122066	NaN	NaN
Q9Y6I3	RCN2_HUMAN	RCN2	9	1	NaN	NaN	NaN	NaN	18.2341	0
Q5KU26	RCN3_HUMAN	RCN3	20	3	NaN	NaN	18.5666	19.2222	19.6657	2	499919	157927	0.315905
Q8TDY8	RD23B_HUMAN	RAD23B	24	3	NaN	NaN	17.6646	NaN	19.8896	1	207761	NaN	NaN
Q9HAV0	REEP5_HUMAN	REEP5	6	1	NaN	NaN	NaN	NaN	17.3726	0
Q86YZ3	REG1A_HUMAN;REG1B_HUMAN	REG1A;REG1B	16	2	21.2828	21.1585	21.173	21.1452	NaN	4	2393910	106555	0.0445107
Q9Y3A3	RELCH_HUMAN	RELCH	15	2	NaN	19.8701	17.1012	NaN	18.4871	2	549441	578190	1.05232
Q13617	RELN_HUMAN	RELN	216	27	20.0925	20.386	20.5263	20.4093	20.4021	4	1347770	165009	0.122431
P05455	RENR_HUMAN	ATP6AP2	6	1	17.9636	18.6885	18.2429	NaN	19.5749	3	329437	85070.6	0.25823
P37235;P61601;P84074	RENT1_HUMAN	UPF1	21	3	NaN	NaN	NaN	NaN	18.5244	0
O75312	RET1_HUMAN	RBP1	47	5	20.3694	20.5044	20.5943	20.4739	20.3102	4	1470340	94146.1	0.0640302
P05981	RET4_HUMAN	RBP4	80	7	22.8117	22.795	22.8691	22.7216	20.4963	4	7304330	306299	0.0419339
P20936	RFA2_HUMAN	RPA2	10	1	NaN	NaN	17.4237	NaN	17.7246	1	175820	NaN	NaN
P55268	RGN_HUMAN	RGN	18	2	24.3662	23.5117	23.8757	24.0466	23.0153	4	16576700	4032220	0.243246
Q93008	RGS10_HUMAN	RGS10	16	2	NaN	NaN	NaN	NaN	18.5356	0
Q13155	RHG17_HUMAN	ARHGAP17	14	2	NaN	NaN	NaN	NaN	18.1081	0
Q9BSL1	RHG25_HUMAN	ARHGAP25	5	1	NaN	NaN	NaN	NaN	17.7047	0
B7Z9C2;F8VRJ2;F8VV59;F8W118	RHOA_HUMAN	RHOA	82	8	20.7498	20.6306	20.6736	20.3261	22.1293	4	1593450	194754	0.122222
Q9BVG4	RHOD_HUMAN	RHOD	15	2	NaN	NaN	NaN	NaN	18.7443	0
P25205	RHOF_HUMAN	RHOF	8	1	NaN	NaN	NaN	NaN	18.4339	0
O15394	RHOG_HUMAN	RHOG	13	2	18.779	19.184	20.0631	NaN	20.2024	3	713636	338604	0.474478
Q15717	RIC8A_HUMAN	RIC8A	6	1	NaN	NaN	NaN	NaN	17.3269	0
Q14651	RINI_HUMAN	RNH1	8	1	18.3603	17.8526	18.6299	18.3146	16.7232	4	326219	69354.4	0.212601
Q02153	RIR1_HUMAN	RRM1	50	6	19.5833	19.7379	19.4877	19.6348	19.1619	4	802277	58095.9	0.0724138
P47895	RISC_HUMAN	SCPEP1	59	7	19.6723	20.0174	19.9372	19.187	20.9793	4	874396	208378	0.238311
P78344	RL10_HUMAN	RPL10	34	4	19.6471	19.5684	19.2429	18.5984	20.1685	4	653957	191816	0.293316
Q9H3T2	RL10A_HUMAN	RPL10A	39	5	19.8808	19.5858	19.4984	19.2973	19.0997	4	784296	134566	0.171575
Q9H3U1	RL11_HUMAN	RPL11	36	5	20.6538	20.5289	19.9547	19.8563	19.8767	4	1281990	351150	0.273909
Q02543	RL12_HUMAN	RPL12	58	5	20.5493	20.2614	20.1641	19.694	20.8072	4	1203590	282540	0.234747
Q13618	RL13_HUMAN	RPL13	15	2	19.9319	19.7863	19.7807	18.3407	19.7889	4	784289	305055	0.388957
P48736	RL13A_HUMAN	RPL13A	21	3	19.6267	19.6039	19.3035	18.8894	19.822	4	684736	151892	0.221825
P0DN79;P35520	RL14_HUMAN	RPL14	14	2	20.5874	20.4855	20.2552	19.8693	20.412	4	1313180	272594	0.207584
O95861	RL15_HUMAN	RPL15	19	3	19.6498	19.2176	19.4961	18.7816	19.2745	4	655582	162324	0.247603
O14618	RL17_HUMAN	RPL17	16	2	NaN	NaN	NaN	NaN	18.9624	0
P15374	RL18_HUMAN	RPL18	27	3	20.3322	20.4436	20.258	19.7497	21.0406	4	1220400	236771	0.194011
Q9H3S7	RL18A_HUMAN	RPL18A	23	3	18.6523	19.0143	18.576	18.1565	19.3903	4	406116	97428.5	0.239903
P30626	RL1D1_HUMAN	RSL1D1	21	3	NaN	18.1419	NaN	NaN	18.5603	1	289231	NaN	NaN
Q9NRA1	RL21_HUMAN	RPL21	6	1	18.8008	NaN	NaN	NaN	21.5745	1	456681	NaN	NaN
Q9NYU2	RL22_HUMAN	RPL22	11	1	20.6929	20.154	19.91	20.3722	20.1188	4	1301040	303430	0.233222
Q9BRG1	RL23_HUMAN	RPL23	30	4	20.8081	20.6703	20.1527	19.8982	20.6268	4	1411850	406363	0.287822
Q9Y3F4	RL24_HUMAN	RPL24	22	3	NaN	19.0527	NaN	NaN	19.9694	1	543795	NaN	NaN
Q16539	RL26_HUMAN	RPL26	43	6	19.9351	19.866	19.6355	19.5682	20.4546	4	887459	108484	0.122241
Q9Y6N7	RL27_HUMAN	RPL27	23	3	20.2704	19.8938	NaN	NaN	20.7344	2	1119410	205458	0.183541
O95897	RL27A_HUMAN	RPL27A	15	2	20.4476	20.7959	20.1931	19.6029	21.3871	4	1311370	428666	0.326885
O95433	RL28_HUMAN	RPL28	19	3	19.5848	19.5091	19.1718	19.0881	19.5812	4	670101	113043	0.168696
Q9ULF5	RL29_HUMAN	RPL29	13	2	19.3221	19.8961	19.4397	19.3379	17.4923	4	751226	151679	0.201909
P03956	RL3_HUMAN	RPL3	6	1	18.0514	18.0842	17.7527	NaN	18.6522	3	256801	31288	0.121838
P46734	RL30_HUMAN	RPL30	30	3	20.2314	20.4486	19.907	19.6831	20.7489	4	1121740	261507	0.233127
O75339	RL31_HUMAN	RPL31	6	1	19.7233	20.1778	19.0684	NaN	20.4143	3	867131	318175	0.366929
P46108	RL34_HUMAN	RPL34	8	1	NaN	17.7197	NaN	NaN	18.306	1	215857	NaN	NaN
P68036	RL36_HUMAN	RPL36	16	2	21.2991	20.9786	20.823	20.0048	20.6867	4	1888430	635347	0.336441
P63151	RL36A_HUMAN;RL36L_HUMAN	RPL36A;RPL36AL	5	1	20.2409	20.1543	19.9746	19.1616	20.1916	4	1005700	292641	0.290981
Q0IIM8	RL37A_HUMAN	RPL37A	8	1	NaN	NaN	NaN	NaN	17.2163	0
P08729	RL4_HUMAN	RPL4	36	5	19.7189	19.9884	19.6739	19.2458	19.7484	4	840303	171542	0.204143
Q9UNE7	RL40_HUMAN;RS27A_HUMAN;UBB_HUMAN;UBC_HUMAN	RPS27A;UBA52;UBB;UBC	51	5	22.704	22.5693	22.6168	21.702	24.2488	4	5724820	1562790	0.272985
Q96C19	RL5_HUMAN	RPL5	56	6	19.5114	19.5727	19.0375	18.9738	20.2607	4	645024	137856	0.213722
Q8NCH0	RL6_HUMAN	RPL6	36	4	20.3907	20.0529	19.4748	20.8022	19.8493	4	1254870	464824	0.370415
P56537	RL7_HUMAN	RPL7	31	4	20.0978	20.237	20.0049	19.4467	20.5396	4	1031160	224209	0.217433
Q9BT78	RL7A_HUMAN	RPL7A	30	3	19.5381	19.8779	19.8122	18.8656	20.5639	4	780748	219987	0.281764
P26599	RL8_HUMAN	RPL8	26	4	20.5186	20.5017	20.1514	19.5932	20.4072	4	1235590	334595	0.270797
P35080	RL9_HUMAN	RPL9	27	2	19.1425	18.849	18.6568	NaN	18.5015	3	488061	83841.7	0.171785
P31689	RLA0_HUMAN	RPLP0	52	6	20.7303	20.7585	20.6679	20.3387	20.868	4	1626350	205232	0.126192
P02792	RLA1_HUMAN	RPLP1	7	1	20.8644	21.0791	20.8318	20.3798	21.1362	4	1838770	352416	0.191659
Q9NZL4	RLA2_HUMAN	RPLP2	30	3	20.6832	20.7687	20.7507	20.3459	21.4303	4	1641830	210760	0.128369
Q15057	RNAS4_HUMAN	RNASE4	12	1	NaN	NaN	18.8262	NaN	19.2896	1	464781	NaN	NaN
Q92499	RNT2_HUMAN	RNASET2	6	1	19.4224	19.8195	19.6722	19.9342	NaN	4	866300	128564	0.148406
P24941;Q00526	RO60_HUMAN	RO60	15	2	19.723	19.6765	19.4375	19.2228	20.2815	4	756310	117730	0.155663
P62834	ROA1_HUMAN	HNRNPA1	41	5	19.7911	19.8044	19.6034	19.5559	19.9588	4	847546	74585.2	0.0880013
O00567	ROA2_HUMAN	HNRNPA2B1	65	9	19.3173	20.0681	19.9216	19.8797	20.6376	4	927578	191848	0.206827
P15735;Q16816	ROA3_HUMAN	HNRNPA3	19	3	NaN	NaN	NaN	NaN	18.4332	0
P41091	ROBO1_HUMAN	ROBO1	26	4	NaN	NaN	18.719	18.3991	19.8288	2	388598	60684	0.156162
Q14558	ROBO2_HUMAN	ROBO2	12	2	19.0264	19.3296	19.4624	NaN	20.9169	3	638416	95859.3	0.150152
Q16881	ROBO4_HUMAN	ROBO4	40	4	20.1875	20.1173	20.2621	20.1799	20.6797	4	1194190	49230.5	0.0412251
P41240	ROCK1_HUMAN	ROCK1	16	2	NaN	NaN	19.5464	18.7992	19.4721	2	610940	218877	0.358262
Q9P0V9	ROCK2_HUMAN	ROCK2	5	1	NaN	NaN	NaN	NaN	18.3316	0
Q9HB71	RPAB3_HUMAN	POLR2H	6	1	NaN	NaN	NaN	NaN	17.2478	0
Q5T4S7	RRAS_HUMAN	RRAS	12	2	NaN	NaN	NaN	NaN	18.3823	0
P25685	RRAS2_HUMAN	RRAS2	40	5	18.8173	19.3851	19.0282	NaN	20.8324	3	560419	113596	0.202699
P16520	RRP44_HUMAN	DIS3	6	1	NaN	NaN	NaN	NaN	18.797	0
Q02108	RS10_HUMAN	RPS10	30	3	19.9311	20.2384	19.3647	19.1952	20.5286	4	877983	295509	0.336577
Q13045	RS11_HUMAN	RPS11	47	6	20.1356	20.1678	19.8355	19.4248	19.9844	4	992318	220885	0.222595
Q96P70	RS12_HUMAN	RPS12	49	5	19.8999	19.5357	19.2691	18.7066	20.3841	4	699475	230793	0.329951
P26368	RS13_HUMAN	RPS13	24	3	20.6438	20.8953	20.1715	19.9919	20.3913	4	1453100	417957	0.287631
Q15056	RS14_HUMAN	RPS14	20	3	20.9706	20.8037	20.2213	19.9606	21.0622	4	1532000	489906	0.319783
O75487;Q9Y625	RS15A_HUMAN	RPS15A	44	6	21.0324	20.7821	20.4104	20.3148	21.0262	4	1661440	388581	0.233881
Q9H159	RS16_HUMAN	RPS16	45	5	21.0584	20.9869	20.435	20.2528	20.3506	4	1732240	467487	0.269875
Q86SJ2	RS17_HUMAN	RPS17	19	2	21.3841	21.1712	20.903	21.1126	18.7517	4	2331620	319790	0.137153
Q9C0C9	RS18_HUMAN	RPS18	62	9	20.9034	20.6741	20.3657	20.0719	20.3611	4	1521910	374747	0.246235
Q9Y365	RS19_HUMAN	RPS19	35	5	19.7379	19.6146	19.0842	18.5135	19.5733	4	651784	229926	0.352764
Q5SZK8	RS2_HUMAN	RPS2	44	6	19.6461	19.7574	19.5736	19.38	20.1836	4	792321	85400.2	0.107785
Q9Y5L0	RS20_HUMAN	RPS20	39	4	20.2546	20.2003	19.7684	19.5194	20.7437	4	1025050	241926	0.236013
O75787	RS23_HUMAN	RPS23	11	2	20.5356	20.5118	19.5191	19.0404	20.9955	4	1076410	505417	0.46954
Q14767	RS24_HUMAN	RPS24	13	2	19.9295	19.8801	19.4294	19.1232	19.9538	4	810136	206126	0.254433
P60903	RS25_HUMAN	RPS25	20	2	21.8095	21.782	21.1054	21.7888	21.6301	4	3290190	690021	0.209721
Q8WVN6	RS26_HUMAN	RPS26	16	2	21.3811	20.9611	NaN	21.352	19.8471	3	2483020	383499	0.154449
P13489	RS27_HUMAN	RPS27	13	2	20.0054	20.0629	NaN	19.7496	20.5696	3	1009790	113131	0.112034
P21283	RS28_HUMAN	RPS28	15	2	20.3477	NaN	NaN	NaN	19.7877	1	1334380	NaN	NaN
Q8IWA5	RS3_HUMAN	RPS3	105	14	21.0589	20.8491	20.4576	20.269	20.7477	4	1694240	419721	0.247735
Q9UGI8	RS3A_HUMAN	RPS3A	78	9	20.7848	20.8449	20.351	20.0483	20.8497	4	1527910	381697	0.249817
Q96SU4	RS4X_HUMAN	RPS4X	105	13	20.7762	20.6529	20.3645	20.0546	20.3651	4	1470890	314983	0.214145
Q9GZS9	RS5_HUMAN	RPS5	53	6	20.9129	20.7694	20.3937	20.122	20.4665	4	1570080	379349	0.241611
Q9H0A8	RS6_HUMAN	RPS6	15	2	19.0039	19.1945	18.7384	18.3337	19.2807	4	473345	116210	0.245508
O60264;P28370	RS7_HUMAN	RPS7	7	1	20.124	20.3322	19.0108	18.8716	20.3035	4	867655	426638	0.491714
Q4G0F5	RS8_HUMAN	RPS8	53	6	20.1093	20.2412	19.7389	19.6693	20.5201	4	1019800	196777	0.192956
Q9UI12	RS9_HUMAN	RPS9	62	8	20.2725	20.2727	19.8457	19.723	20.7911	4	1085240	211824	0.195187
Q09328	RSMB_HUMAN;RSMN_HUMAN	SNRPB;SNRPN	6	1	18.8315	18.9019	NaN	NaN	20.0818	2	478154	16483.5	0.0344732
P01861	RSSA_HUMAN	RPSA	53	6	21.4603	21.2522	21.1291	20.9581	21.2566	4	2428410	358162	0.147488
Q9NRX4	RSU1_HUMAN	RSU1	63	8	20.605	20.8239	20.7669	20.8126	22.4752	4	1769260	120305	0.0679974
P02788	RTCA_HUMAN	RTCA	22	3	NaN	19.9335	19.0531	18.7294	19.6817	3	659961	300643	0.455547
Q9H8L6	RTCB_HUMAN	RTCB	27	4	NaN	19.5887	19.6663	18.6662	20.7744	3	678849	228677	0.336859
Q9Y6M5	RTN4_HUMAN	RTN4	14	2	19.7502	19.7861	19.0508	NaN	21.091	3	776339	202318	0.260606
O15260	RTRAF_HUMAN	RTRAF	34	4	19.2091	19.1101	19.936	20.0589	19.4761	4	816805	269522	0.329971
P63096	RU2A_HUMAN	SNRPA1	25	3	NaN	19.3976	NaN	NaN	19.3248	1	690660	NaN	NaN
O43150	RU2B_HUMAN;SNRPA_HUMAN	SNRPA;SNRPB2	10	1	NaN	NaN	NaN	NaN	17.5143	0
Q5T749	RUVB1_HUMAN	RUVBL1	66	8	19.4074	20.0825	19.759	19.5421	20.7298	4	864086	182347	0.211029
Q92692	RUVB2_HUMAN	RUVBL2	82	10	19.4962	19.4974	19.4032	19.2778	20.2321	4	702138	49471.5	0.0704583
Q9Y446	RUXE_HUMAN	SNRPE	12	1	19.5442	19.6513	19.2619	18.8551	20.0468	4	672704	155445	0.231075
Q13596	RUXGL_HUMAN;RUXG_HUMAN	SNRPG;SNRPGP15	8	1	NaN	NaN	NaN	NaN	17.1714	0
P30419	S10A1_HUMAN	S100A1	12	1	19.56	20.0521	19.8309	19.6003	19.886	4	896888	145214	0.161908
P49023	S10A2_HUMAN	S100A2	23	2	20.3538	19.5424	19.5507	18.8891	22.156	4	839246	359008	0.427774
O14793	S10A6_HUMAN	S100A6	8	1	20.4661	20.2313	20.056	19.9659	21.466	4	1198390	187736	0.156658
Q8N8S7	S10A7_HUMAN	S100A7	19	2	19.5688	19.1237	19.2569	19.8704	18.2275	4	733470	173554	0.23662
Q96DN2	S10AA_HUMAN	S100A10	17	2	NaN	18.3218	NaN	NaN	19.9569	1	327647	NaN	NaN
O76021	S10AB_HUMAN	S100A11	39	5	19.5982	19.7812	20.1355	19.9153	21.2303	4	958819	151396	0.157898
Q13148	S10AD_HUMAN	S100A13	6	1	NaN	NaN	NaN	NaN	18.8441	0
Q9UG63	S10AE_HUMAN	S100A14	97	8	20.0002	19.4033	19.5423	19.2511	22.5441	4	782388	186471	0.238335
O96019	S10AG_HUMAN	S100A16	49	4	20.3659	20.0274	19.9521	18.8783	23.1678	4	979050	362877	0.370642
Q9UQP3	S22A8_HUMAN	SLC22A8	9	1	22.7813	23.0901	23.3039	23.3	24.0573	4	9205300	1488280	0.161676
P38646	S23IP_HUMAN	SEC23IP	6	1	NaN	NaN	NaN	NaN	17.6691	0
P78504	S26A7_HUMAN	SLC26A7	8	1	NaN	NaN	20.3047	19.9969	20.1038	2	1170780	175959	0.150292
Q9Y5Y6	S29A1_HUMAN	SLC29A1	25	3	19.4437	19.1093	19.659	NaN	20.6673	3	702154	131484	0.187258
Q32P28	S38A1_HUMAN	SLC38A1	11	2	17.7233	18.0707	18.3493	NaN	20.3153	3	275219	58780	0.213575
Q9H2H9	S38A2_HUMAN	SLC38A2	8	1	20.4279	NaN	NaN	NaN	21.273	1	1410580	NaN	NaN
Q9NZ52;Q9UJY4;Q9UJY5	S38A5_HUMAN	SLC38A5	49	6	20.3844	20.2094	20.4193	19.4735	21.5087	4	1177820	311119	0.264148
P40763	S39AA_HUMAN	SLC39A10	22	3	18.1491	NaN	18.8722	NaN	20.4	2	385256	133749	0.347169
Q9UNS2	S39AE_HUMAN	SLC39A14	34	4	18.9471	18.5987	19.2715	NaN	20.3709	3	511744	118063	0.230706
Q09666	S43A3_HUMAN	SLC43A3	13	2	NaN	NaN	18.9384	NaN	20.3729	1	502356	NaN	NaN
Q14008	S4A7_HUMAN	SLC4A7	6	1	NaN	NaN	NaN	NaN	17.4894	0
Q12874	SAA1_HUMAN;SAA2_HUMAN	SAA1;SAA2	6	1	19.9463	20.1887	20.1448	NaN	NaN	3	1121550	98034.2	0.0874099
O75390	SAA4_HUMAN	SAA4	21	2	21.6442	21.5559	21.7392	21.4995	NaN	4	3206510	234700	0.0731948
P39023	SAE1_HUMAN	SAE1	7	1	NaN	NaN	NaN	NaN	19.4031	0
P29350	SAE2_HUMAN	UBA2	14	2	19.5427	19.2587	19.4294	19.0725	20.0399	4	662084	92628.2	0.139904
Q8TD19	SAHH_HUMAN	AHCY	227	21	21.548	21.8352	21.9469	21.944	21.4428	4	3721190	458665	0.123258
P52849	SAHH2_HUMAN	AHCYL1	18	2	18.9655	19.1612	19.0344	NaN	18.0759	3	545034	37842.6	0.0694315
P67870	SAMP_HUMAN	APCS	14	2	20.8748	20.7455	20.865	20.6981	NaN	4	1822930	110414	0.0605693
Q13976	SAP_HUMAN	PSAP	204	17	20.588	20.2912	20.2401	19.8967	22.7942	4	1268440	245786	0.19377
Q4G148	SAP18_HUMAN	SAP18	6	1	NaN	NaN	NaN	NaN	17.2645	0
A5YKK6	SAP3_HUMAN	GM2A	14	2	19.5958	19.6364	19.4132	19.8244	NaN	4	808485	94632.3	0.117049
Q9UBQ5	SAR1A_HUMAN;SAR1B_HUMAN	SAR1A;SAR1B	6	1	21.5475	21.8823	21.5509	21.6883	21.5445	4	3345590	376394	0.112505
Q53EL6	SBDS_HUMAN	SBDS	7	1	NaN	NaN	NaN	NaN	18.5669	0
P04156	SBP1_HUMAN	SELENBP1	68	9	20.6606	20.8716	20.7858	20.8096	18.2025	4	1805420	109149	0.0604564
O94923	SC23A_HUMAN;SC23B_HUMAN	SEC23A;SEC23B	12	1	NaN	NaN	NaN	NaN	18.5009	0
Q9UBB4	SC24C_HUMAN	SEC24C	5	1	NaN	NaN	NaN	NaN	18.3879	0
Q9BV20	SC31A_HUMAN	SEC31A	37	5	19.3012	20.2944	20.0232	19.9726	19.9053	4	1006590	265850	0.26411
P60520	SC5A3_HUMAN	SLC5A3	10	1	NaN	NaN	NaN	NaN	19.4002	0
O00743	SC5A6_HUMAN	SLC5A6	26	3	19.9356	19.9143	20.2028	NaN	19.2651	3	1065910	122246	0.114687
Q96GG9	SC6A8_HUMAN	SLC6A8	6	1	NaN	NaN	NaN	NaN	18.8867	0
P55769	SCFD1_HUMAN	SCFD1	9	1	NaN	NaN	NaN	NaN	17.4403	0
P49207	SCRB1_HUMAN	SCARB1	25	4	19.2466	19.4669	19.457	19.1199	20.2932	4	659017	75986.3	0.115303
Q6P9B6	SCRIB_HUMAN	SCRIB	8	1	NaN	NaN	NaN	NaN	16.9442	0
Q9Y530	SCRN3_HUMAN	SCRN3	15	2	19.6917	20.0187	19.8843	19.6584	21.0952	4	926102	109980	0.118756
O95819	SCTM1_HUMAN	SECTM1	7	1	17.6261	19.0127	17.9266	NaN	NaN	3	326789	176611	0.540445
P54727	SCYL1_HUMAN	SCYL1	8	1	NaN	NaN	NaN	NaN	19.2258	0
Q9H3P2	SCYL2_HUMAN	SCYL2	8	1	NaN	NaN	16.9494	NaN	18.9308	1	126556	NaN	NaN
O43390	SDC1_HUMAN	SDC1	22	2	23.3833	23.21	22.9979	21.8676	24.3482	4	8211790	3105490	0.378175
P35236	SDC4_HUMAN	SDC4	52	6	22.6139	22.3261	22.3415	21.0257	24.2643	4	4781580	1843580	0.385557
P30048	SDCB1_HUMAN	SDCBP	74	8	21.3264	21.3736	21.2595	20.1813	23.1005	4	2261500	720027	0.318384
P07550	SDK1_HUMAN	SDK1	60	7	20.0929	20.2648	20.4994	20.4888	20.3295	4	1332980	176006	0.132039
Q13409	SDK2_HUMAN	SDK2	47	5	19.4001	19.6896	19.5654	19.5289	19.2653	4	767441	63286.5	0.0824643
O14530	SEM3A_HUMAN	SEMA3A	5	1	NaN	NaN	NaN	NaN	16.7347	0
P13942	SEM3B_HUMAN	SEMA3B	47	7	NaN	NaN	NaN	NaN	19.0586	0
P42574	SEM3C_HUMAN	SEMA3C	81	10	19.3369	19.4472	19.1689	NaN	20.7242	3	655473	62951.9	0.0960403
P00813	SEM3F_HUMAN	SEMA3F	56	7	18.7453	19.1615	19.2379	19.0801	20.2141	4	549586	77952.6	0.141839
P15927	SEM3G_HUMAN	SEMA3G	6	1	18.4362	19.1355	19.3269	18.8614	18.9554	4	516120	130707	0.253249
Q10472	SEM4B_HUMAN	SEMA4B	43	6	20.9967	21.1994	21.3221	21.2286	21.0862	4	2394810	221369	0.0924368
Q96FN4	SEM4C_HUMAN	SEMA4C	39	5	19.2532	19.5428	19.6362	19.6613	19.2006	4	758166	93197.3	0.122925
P49913	SEM4G_HUMAN	SEMA4G	17	2	19.7128	19.7254	19.7132	19.6574	19.88	4	853158	17818.4	0.0208852
P02511	SEM6C_HUMAN	SEMA6C	15	2	NaN	18.5278	18.8156	18.5393	19.0038	3	406761	47320.2	0.116334
O75954	SEM6D_HUMAN	SEMA6D	58	7	19.2069	19.5976	19.5853	19.5836	19.4695	4	742702	91783.6	0.123581
Q8NBF2	SEM7A_HUMAN	SEMA7A	20	3	20.0309	20.2058	20.335	20.3724	21.1477	4	1240170	129117	0.104112
Q9H0P0	SEP10_HUMAN	SEPTIN10	9	1	NaN	18.4923	18.4639	18.3198	19.3472	3	352506	22202.4	0.0629844
P22692	SEP11_HUMAN	SEPTIN11	69	8	19.5569	19.7371	19.7497	19.7681	20.6061	4	854902	56302.1	0.065858
Q6P3W7	SEPP1_HUMAN	SELENOP	25	3	20.4804	20.4974	20.5263	20.4424	NaN	4	1469550	35642.2	0.0242538
Q9P258	SEPR_HUMAN	FAP	101	10	20.205	20.1928	20.1538	20.2761	21.0958	4	1210860	43167.1	0.0356498
Q96L58	SEPT2_HUMAN	SEPTIN2	80	9	19.3341	19.6039	19.4056	19.373	20.2758	4	707802	60902.3	0.0860443
Q99733	SEPT4_HUMAN	SEPTIN4	6	1	19.3516	19.2881	19.5648	19.684	20.146	4	731733	93914.1	0.128345
Q9NT68	SEPT7_HUMAN	SEPTIN7	64	8	20.1308	20.2955	20.358	20.2683	20.7039	4	1260450	82241.6	0.0652478
Q14980	SEPT8_HUMAN	SEPTIN8	24	3	NaN	NaN	NaN	NaN	18.1441	0
Q9Y2A7	SEPT9_HUMAN	SEPTIN9	35	5	20.0728	20.4336	20.3838	20.4103	21.2477	4	1320210	146234	0.110766
Q13214	SERA_HUMAN	PHGDH	51	7	20.3791	20.6581	20.6496	20.6876	20.9346	4	1588010	150739	0.0949233
Q9NR30	SERB_HUMAN	PSPH	22	3	19.2553	19.3104	19.6103	19.3652	19.8062	4	687909	77666.9	0.112903
Q9NZM1	SERC_HUMAN	PSAT1	27	4	21.1803	21.5138	21.6052	21.688	21.2159	4	2984850	434989	0.145732
P53801	SERPH_HUMAN	SERPINH1	73	9	20.4708	20.5178	20.6178	20.686	20.7534	4	1562640	105461	0.0674891
R4GN18	SF01_HUMAN	SF1	6	1	NaN	NaN	NaN	NaN	18.0539	0
Q2M2I8;Q9NSY1	SF3A2_HUMAN	SF3A2	6	1	NaN	NaN	NaN	NaN	17.9616	0
Q9BQL6	SF3A3_HUMAN	SF3A3	17	2	NaN	17.9805	NaN	NaN	18.7672	1	258626	NaN	NaN
P53041	SG3A2_HUMAN	SCGB3A2	16	2	20.223	20.3638	20.6287	20.2944	NaN	4	1370100	175091	0.127794
Q92696	SGCE_HUMAN	SGCE	21	3	19.1605	19.7458	19.648	19.5512	19.3999	4	763745	126883	0.166133
B7Z596;F5H7S3;H7BYY1	SGTA_HUMAN	SGTA	6	1	20.376	20.431	20.7903	20.7475	20.4353	4	1587090	232778	0.14667
Q9UDY2	SH3G1_HUMAN	SH3GL1	20	3	NaN	NaN	NaN	NaN	20.0221	0
Q7Z460	SH3L2_HUMAN	SH3BGRL2	6	1	NaN	NaN	NaN	NaN	17.7696	0
Q15029	SH3L3_HUMAN	SH3BGRL3	15	2	20.5635	20.5946	20.7846	20.6259	20.0925	4	1639400	114754	0.0699976
Q16629	SHBG_HUMAN	SHBG	127	13	22.97	23.0676	23.0684	22.9878	18.7151	4	8530110	306890	0.0359773
Q07021	SHLB1_HUMAN	SH3GLB1	24	3	18.4502	19.0425	19.1934	19.592	19.4172	4	571975	178094	0.311368
O00214	SIA10_HUMAN	ST3GAL6	7	1	19.6915	19.4518	19.2874	19.8114	20.495	4	780947	126058	0.161417
Q5VYK3	SIA8D_HUMAN	ST8SIA4	41	5	19.7987	19.5642	19.4707	19.6091	18.7318	4	803380	78549.7	0.0977741
O75367	SIAS_HUMAN	NANS	28	3	19.3806	19.959	19.9716	19.7967	19.576	4	910157	160839	0.176716
O76061	SIAT1_HUMAN	ST6GAL1	10	1	NaN	NaN	19.8589	NaN	19.4671	1	950904	NaN	NaN
P08237	SIL1_HUMAN	SIL1	52	7	NaN	19.489	19.0165	18.8656	21.3783	3	581273	136420	0.234692
O14657	SIR2_HUMAN	SIRT2	6	1	18.675	19.0328	18.6539	NaN	18.9477	3	455792	69837	0.153221
P61923	SKP1_HUMAN	SKP1	9	1	19.0217	18.8428	NaN	18.6821	19.2288	3	474342	55932.1	0.117915
P61812	SL7A1_HUMAN	SLC7A1	38	5	19.7679	19.8097	19.5852	18.8814	19.9557	4	770318	199987	0.259616
Q8IZP0	SLIK4_HUMAN	SLITRK4	37	4	19.1032	19.014	19.287	19.0684	20.3451	4	570493	48172.1	0.0844395
Q05519	SLIRP_HUMAN	SLIRP	9	1	NaN	NaN	NaN	NaN	18.2682	0
Q9UPN3	SLK_HUMAN	SLK	40	5	NaN	NaN	20.4751	20.0655	19.305	2	1277420	254745	0.199422
Q9HB63	SMCA1_HUMAN;SMCA5_HUMAN	SMARCA1;SMARCA5	6	1	NaN	18.2706	NaN	NaN	19.0445	1	316234	NaN	NaN
Q03252	SMD2_HUMAN	SNRPD2	7	1	NaN	NaN	NaN	NaN	18.2411	0
O75695	SMD3_HUMAN	SNRPD3	12	2	18.7402	19.7997	18.5919	NaN	20.7312	3	581878	287256	0.493671
Q14512	SNAA_HUMAN	NAPA	30	4	19.3461	19.858	19.7986	19.6607	19.9219	4	839364	125949	0.150053
Q96RF0	SND1_HUMAN	SND1	74	9	18.9427	19.5064	18.9829	18.9388	19.1993	4	567305	118499	0.20888
P45983;P45984;P53779	SNED1_HUMAN	SNED1	23	3	20.7468	20.7576	20.7339	20.8044	19.7084	4	1776910	38095.1	0.021439
O14908	SNF8_HUMAN	SNF8	12	1	NaN	NaN	NaN	NaN	18.7425	0
Q92734	SNP23_HUMAN	SNAP23	24	3	18.8931	NaN	19.0539	NaN	19.7321	2	515549	40591.5	0.0787345
Q9BQ67	SNX1_HUMAN	SNX1	13	2	NaN	18.2013	18.2586	18.1462	18.543	3	301700	11757.7	0.0389716
Q9UHI8	SNX12_HUMAN	SNX12	16	2	20.2251	20.3373	20.4595	20.3485	20.4759	4	1331850	88399	0.0663733
Q08945	SNX18_HUMAN	SNX18	15	2	NaN	NaN	NaN	NaN	17.3137	0
O43665	SNX2_HUMAN	SNX2	68	8	18.8777	19.2467	19.2011	19.3345	19.998	4	591877	77389.3	0.130752
P00750	SNX3_HUMAN	SNX3	22	3	19.8702	19.341	NaN	19.0501	19.7896	3	721756	213696	0.296078
P31942	SNX33_HUMAN	SNX33	15	2	NaN	NaN	NaN	NaN	18.2157	0
O14787	SNX4_HUMAN	SNX4	13	2	NaN	18.5085	NaN	19.0315	18.9967	2	454391	115216	0.253561
P61513	SNX5_HUMAN	SNX5	57	6	19.202	19.5471	19.5438	19.5531	19.6111	4	725674	81758.1	0.112665
Q7Z2Z2	SNX6_HUMAN	SNX6	16	2	18.8838	19.2371	19.2165	19.215	19.7229	4	579839	64234.5	0.11078
Q15637	SNX9_HUMAN	SNX9	46	5	NaN	19.1518	19.1737	18.7186	20.2919	3	535059	89908.3	0.168034
Q9NS15	SODM_HUMAN	SOD2	16	2	21.1928	21.2103	21.2024	21.0664	NaN	4	2358060	108747	0.0461171
Q9Y337	SORCN_HUMAN	SRI	23	3	NaN	18.4529	18.6077	18.7118	19.4999	3	395881	35398.5	0.0894172
Q92841	SP20H_HUMAN	SUPT20H	6	1	NaN	NaN	21.5299	NaN	NaN	1	3027860	NaN	NaN
K7EMQ3	SPA11_HUMAN	SERPINA11	6	1	19.8568	20.17	20.1925	20.1556	NaN	4	1123860	116920	0.104034
Q16270	SPAST_HUMAN	SPAST	17	2	NaN	NaN	NaN	NaN	19.1259	0
P54764	SPB6_HUMAN	SERPINB6	18	2	NaN	NaN	19.1122	19.3498	18.4883	2	617400	71736.6	0.116191
P98155	SPD2A_HUMAN	SH3PXD2A	6	1	NaN	NaN	NaN	NaN	17.7177	0
P31751	SPEE_HUMAN	SRM	19	3	19.4556	19.9501	19.953	19.7931	20.447	4	913856	139100	0.152212
Q5EB52	SPIT2_HUMAN	SPINT2	18	3	NaN	NaN	19.2048	NaN	20.2216	1	604248	NaN	NaN
O75044;P0DJJ0;P0DMP2	SPON1_HUMAN	SPON1	35	4	NaN	20.2949	20.5524	20.61	21.5541	3	1474830	166209	0.112697
P49959	SPON2_HUMAN	SPON2	11	2	22.4434	22.6938	22.7562	22.7664	22.8674	4	6676680	666848	0.0998772
P17342	SPP24_HUMAN	SPP2	33	4	21.3405	21.2709	21.406	21.2383	19.5213	4	2609570	135896	0.0520759
Q9H3K6	SPRC_HUMAN	SPARC	56	5	19.6284	19.6871	19.689	19.6164	21.0869	4	825895	21843.6	0.0264484
Q9H2X0	SPRL1_HUMAN	SPARCL1	40	3	21.4435	20.9117	21.116	21.3891	21.1545	4	2460930	411565	0.167239
Q9Y5F8;Q9Y5F9	SPSY_HUMAN	SMS	5	1	18.7017	19.1035	19.59	19.4875	19.7843	4	628482	165617	0.263519
Q9HC35	SPTB2_HUMAN	SPTBN1	198	24	19.3157	19.5937	19.4138	19.2304	20.3667	4	689315	75995.4	0.110248
Q9Y653	SPTN1_HUMAN	SPTAN1	255	32	19.4257	19.7548	19.2979	19.5486	19.8889	4	750081	102694	0.13691
P62079	SRC_HUMAN	SRC	45	5	19.2975	19.6641	19.4004	NaN	20.3891	3	722372	96842.5	0.134062
Q9UI42	SRC8_HUMAN	CTTN	17	2	NaN	NaN	NaN	NaN	17.3965	0
Q92619	SRCRL_HUMAN	SSC5D	29	4	19.7575	20.0478	20.007	19.6129	19.3117	4	956442	134825	0.140965
Q9BY43	SRG2B_HUMAN;SRG2C_HUMAN;SRGP2_HUMAN	SRGAP2;SRGAP2B;SRGAP2C	18	2	NaN	NaN	NaN	NaN	18.0767	0
Q13895	SRGP1_HUMAN	SRGAP1	16	2	NaN	NaN	NaN	NaN	17.8552	0
Q14257	SRP09_HUMAN	SRP9	11	2	NaN	19.4602	NaN	NaN	21.885	1	721284	NaN	NaN
Q9UNZ2	SRP14_HUMAN	SRP14	23	3	19.3376	19.8078	19.2428	NaN	21.6386	3	733569	160923	0.219369
Q15428	SRP19_HUMAN	SRP19	6	1	NaN	NaN	NaN	NaN	15.1611	0
Q9UMR5	SRP68_HUMAN	SRP68	7	1	NaN	NaN	NaN	NaN	15.7752	0
Q12906	SRPX2_HUMAN	SRPX2	17	2	NaN	NaN	NaN	NaN	18.4183	0
Q96T76	SRS11_HUMAN	SRSF11	6	1	NaN	NaN	NaN	NaN	18.1175	0
P51991	SRSF7_HUMAN	SRSF7	8	1	NaN	NaN	NaN	NaN	18.9904	0
Q9P206	SSBP_HUMAN	SSBP1	29	4	NaN	NaN	NaN	NaN	18.9066	0
P27695	SSRP1_HUMAN	SSRP1	16	2	NaN	NaN	NaN	NaN	17.1034	0
Q9H1J7	ST14_HUMAN	ST14	18	2	NaN	NaN	NaN	18.0766	19.1232	1	276435	NaN	NaN
O15372	ST1A1_HUMAN;ST1A2_HUMAN	SULT1A1;SULT1A2	6	1	18.9718	19.6786	19.8208	19.5069	19.8962	4	756101	177452	0.234693
O00422	ST1C2_HUMAN	SULT1C2	5	1	20.3151	21.1353	21.1682	21.4256	20.0039	4	2195240	636969	0.290159
Q8WUW1	ST1C4_HUMAN	SULT1C4	6	1	19.2226	19.6907	19.6112	19.2885	19.0734	4	724806	116106	0.160189
Q6ZT62;Q9Y3L3	ST1E1_HUMAN	SULT1E1	30	3	21.0823	21.3375	21.4793	21.4076	20.8855	4	2643870	303739	0.114884
Q16512	ST38L_HUMAN;STK38_HUMAN	STK38;STK38L	11	1	NaN	NaN	NaN	NaN	19.0316	0
Q14155	STA10_HUMAN	STARD10	16	2	NaN	NaN	18.4445	18.2636	18.4678	2	335719	29716.2	0.0885151
Q99961	STA5B_HUMAN	STAT5B	54	7	18.7739	19.336	19.085	19.1186	19.4181	4	558829	87453.2	0.156494
Q9UHY1	STAB1_HUMAN	STAB1	16	3	19.6184	19.8031	19.6997	19.825	20.491	4	875008	57573.6	0.0657978
Q6P9F0	STAB2_HUMAN	STAB2	16	2	19.8724	20.132	20.0391	20.29	19.7322	4	1117080	134816	0.120686
Q9H3G5	STAT1_HUMAN	STAT1	32	4	19.8142	20.0336	19.9487	20.2045	19.6617	4	1053840	120247	0.114104
Q15075	STAT3_HUMAN	STAT3	15	2	NaN	17.6958	18.3272	NaN	18.511	2	270591	82417.1	0.304582
P23193	STC2_HUMAN	STC2	37	5	NaN	NaN	NaN	NaN	19.3948	0
Q14563	STIP1_HUMAN	STIP1	65	8	18.9862	19.2384	19.3859	19.1035	20.468	4	596526	71631.7	0.120081
A0A087WWU8	STK24_HUMAN	STK24	18	3	19.8112	19.6189	19.5033	NaN	19.8497	3	822742	89721.5	0.109052
O43852	STOM_HUMAN	STOM	47	7	20.9439	20.7397	20.8344	19.6584	22.0292	4	1616340	537045	0.332261
P52333	STRAP_HUMAN	STRAP	15	2	18.8289	18.5619	18.2891	NaN	18.5704	3	390981	72751.4	0.186074
O60687	STX7_HUMAN	STX7	8	1	NaN	NaN	NaN	NaN	16.8484	0
Q13616	STXB1_HUMAN	STXBP1	9	1	NaN	NaN	NaN	NaN	16.9798	0
P14314	STXB2_HUMAN	STXBP2	14	2	NaN	19.2367	19.3856	NaN	18.6025	2	651346	47516	0.0729505
Q9UJC5	STXB3_HUMAN	STXBP3	16	2	NaN	NaN	NaN	NaN	17.9389	0
Q9Y3P9	SUMO2_HUMAN;SUMO3_HUMAN;SUMO4_HUMAN	SUMO2;SUMO3;SUMO4	6	1	NaN	NaN	NaN	NaN	19.2702	0
O60636	SURF4_HUMAN	SURF4	9	1	18.2275	NaN	NaN	NaN	18.2264	1	306917	NaN	NaN
O75821	SUSD2_HUMAN	SUSD2	30	4	20.5696	20.7346	20.7695	20.5389	17.8937	4	1652980	132487	0.0801505
P08779	SVEP1_HUMAN	SVEP1	46	7	20.0793	20.5353	20.6511	20.3291	20.498	4	1397860	236172	0.168952
O60271	SYAC_HUMAN	AARS1	67	8	19.2998	19.2551	19.4019	19.247	19.8275	4	646497	32462.9	0.0502136
Q14289	SYDC_HUMAN	DARS1	60	7	19.952	20.0167	20.0051	19.9943	20.9099	4	1042940	20260.7	0.0194266
Q9Y4Z0	SYEP_HUMAN	EPRS1	96	13	19.4684	19.6569	19.4134	19.2322	20.2961	4	716542	86949.5	0.121346
P52306	SYFA_HUMAN	FARSA	16	2	18.6835	19.2074	18.7221	18.9773	20.1415	4	493725	85640.2	0.173457
Q96TA1	SYFB_HUMAN	FARSB	29	5	19.1409	19.2265	19.028	18.7171	20.1364	4	539242	79083.2	0.146656
P24752	SYIC_HUMAN	IARS1	47	6	NaN	19.6709	19.0033	NaN	20.7192	2	680083	218651	0.321506
Q7Z3U7	SYK_HUMAN	KARS1	34	5	NaN	19.5973	19.3803	19.1412	20.1841	3	684593	107523	0.157061
Q9NRW7	SYLC_HUMAN	LARS1	86	10	18.9397	18.8499	19.0038	NaN	18.8794	3	500321	26670.2	0.0533062
O95685	SYMC_HUMAN	MARS1	9	1	NaN	NaN	NaN	NaN	18.7938	0
P51636	SYNC_HUMAN	NARS1	26	4	20.0535	20.62	19.8914	20.0242	21.0513	4	1184660	288998	0.24395
A0A3B3ITY6	SYQ_HUMAN	QARS1	21	3	19.1942	19.4653	19.3877	19.1874	20.2573	4	651644	63406	0.0973017
Q93009	SYRC_HUMAN	RARS1	87	11	18.6559	19.5687	19.0551	19.1945	20.1045	4	583831	151121	0.258844
Q14258	SYSC_HUMAN	SARS1	93	11	19.965	20.1595	20.264	20.1282	20.3877	4	1149940	97258.6	0.0845769
Q01085	SYTC_HUMAN	TARS1	75	11	20.3393	20.1727	20.2559	20.1874	20.461	4	1238630	66139.3	0.0533971
P48729	SYTL4_HUMAN	SYTL4	8	1	NaN	NaN	NaN	NaN	18.381	0
P35606	SYVC_HUMAN	VARS1	33	4	18.6223	19.4524	18.8314	19.1685	19.0663	4	544150	138857	0.255181
Q05397	SYWC_HUMAN	WARS1	48	6	19.9722	19.6782	20.0203	19.9192	20.0883	4	980598	98923.7	0.100881
Q9NZT2	SYYC_HUMAN	YARS1	25	3	19.785	20.0938	20.3399	19.9083	20.0847	4	1083400	185270	0.171008
Q8TDW7	T4S1_HUMAN	TM4SF1	8	1	NaN	NaN	NaN	NaN	17.754	0
Q96QR8	TACC1_HUMAN	TACC1	6	1	19.9528	20.1176	19.7671	19.751	18.474	4	981762	120106	0.122337
Q9UIC8	TACD2_HUMAN	TACSTD2	132	10	20.7463	20.439	20.3991	19.2171	23.5784	4	1293180	486121	0.375913
O75131	TADBP_HUMAN	TARDBP	6	1	18.3794	18.0629	NaN	17.9461	19.127	3	289121	46176.2	0.159712
Q6P1N9	TAGL_HUMAN	TAGLN	56	6	19.0316	19.5586	19.3372	19.6716	21.3107	4	701380	131407	0.187355
Q9GZS3	TAGL2_HUMAN	TAGLN2	118	13	21.646	21.9445	22.0343	21.8162	22.6601	4	3826410	439077	0.114749
P13928;Q5VT79	TALDO_HUMAN	TALDO1	92	11	20.8021	20.772	20.8225	20.6584	20.2582	4	1782070	88660	0.0497511
Q9Y6M7	TAOK3_HUMAN	TAOK3	49	6	19.1818	19.2541	19.2646	19.3223	19.9022	4	626326	24935.6	0.0398125
P69849;Q15155;Q5JPE7	TARSH_HUMAN	ABI3BP	89	8	23.1632	23.1073	23.1669	23.0584	20.632	4	9145700	324453	0.035476
P15692	TATD1_HUMAN	TATDN1	7	1	NaN	NaN	NaN	NaN	17.1701	0
Q7Z6B7	TBA1A_HUMAN	TUBA1A	54	5	21.8409	22.2101	22.0758	22.0957	22.369	4	4377640	455942	0.104152
O14917	TBA4A_HUMAN	TUBA4A	206	20	22.4734	22.8509	22.8314	22.8219	23.1144	4	7066510	831303	0.11764
Q1KMD3	TBAL3_HUMAN	TUBAL3	6	1	17.9978	19.3741	NaN	NaN	19.9451	2	470610	295377	0.627647
Q9P2T1	TBB2A_HUMAN;TBB2B_HUMAN	TUBB2A;TUBB2B	6	1	19.8154	20.2235	20.0679	20.0562	20.8726	4	1084070	123799	0.114199
O00139	TBB3_HUMAN	TUBB3	6	1	NaN	NaN	NaN	NaN	17.5196	0
Q92599	TBB4A_HUMAN	TUBB4A	30	4	19.0806	19.4518	19.5163	19.4992	19.3104	4	690604	91833.7	0.132976
O75054	TBB4B_HUMAN	TUBB4B	219	22	21.775	22.1897	22.0331	21.9826	22.4872	4	4201980	491859	0.117054
Q9NY35	TBB5_HUMAN	TUBB	60	5	20.6923	20.8013	20.8745	20.798	21.1312	4	1816800	93615.6	0.0515278
Q13283	TBB6_HUMAN	TUBB6	50	5	19.798	20.4455	20.1139	20.0574	20.422	4	1141330	214075	0.187566
Q86VR8	TBC8B_HUMAN	TBC1D8B	8	1	NaN	18.5968	18.6644	18.3022	19.0351	3	378391	48713.2	0.128738
P31947	TBCB_HUMAN	TBCB	6	1	NaN	NaN	NaN	NaN	17.5995	0
P57735	TCEA1_HUMAN	TCEA1	7	1	NaN	NaN	NaN	NaN	18.3241	0
Q9UHF1	TCP4_HUMAN	SUB1	24	3	20.196	NaN	19.7337	19.519	19.4717	3	941428	232889	0.247378
P09543	TCPA_HUMAN	TCP1	143	15	20.0631	20.0556	20.0207	20.0161	20.8822	4	1077310	17852	0.0165709
P51805	TCPB_HUMAN	CCT2	218	21	20.0303	20.1466	19.9535	19.833	20.7135	4	1045200	95332.5	0.0912099
Q9BV40	TCPD_HUMAN	CCT4	124	16	20.0781	20.24	20.0541	19.8151	21.1432	4	1089100	129589	0.118987
Q96K80	TCPE_HUMAN	CCT5	117	12	20.3399	20.296	20.2722	20.0567	20.9119	4	1242850	104606	0.0841661
Q13310	TCPG_HUMAN	CCT3	140	16	19.9961	20.1875	20.0339	19.9484	21.054	4	1081270	79342	0.0733786
P56192	TCPH_HUMAN	CCT7	120	14	20.186	20.4658	20.205	19.9752	20.883	4	1220100	172008	0.140978
P68400;Q8NEV1	TCPQ_HUMAN	CCT8	182	21	20.0649	20.0759	19.9768	19.8852	21.0814	4	1050550	63839.5	0.0607676
P33991	TCPW_HUMAN	CCT6B	7	1	19.2389	19.3112	19.0615	18.5407	20.8547	4	549412	120111	0.218617
P18621	TCPZ_HUMAN	CCT6A	145	16	20.2006	20.2132	20.2006	20.1311	20.8946	4	1193460	30528.9	0.0255801
Q9GZT3	TCTP_HUMAN	TPT1	29	3	19.6543	20.0708	20.2413	20.1168	19.2017	4	1075730	177008	0.164547
P53794	TEBP_HUMAN	PTGES3	29	4	20.7526	20.3192	20.2062	20.161	20.876	4	1364270	274321	0.201076
P08069	TECT3_HUMAN	TCTN3	17	2	NaN	19.3112	18.6455	19.0446	18.2127	3	533779	120365	0.225496
A8MWD9;P62308	TEN2_HUMAN	TENM2	166	21	NaN	NaN	NaN	NaN	19.4037	0
[truncated: 191 more rows]
