# Supplementary material for: Head and neck squamous cell carcinoma-derived extracellular vesicles mediate Ca²⁺-dependent platelet activation and aggregation through tissue factor
Source: Cell Commun Signal. 2025 May 1;23:210. doi: 10.1186/s12964-025-02215-x (PMC12044835; doi:10.1186/s12964-025-02215-x)
Supplement: Supplementary file 3 — Supplementary Material 3 [file 12964_2025_2215_MOESM3_ESM.xlsx]

## Sheet: Tabelle1
Supplementary Table S3. The top enriched pathways ranked by -log10(p-value) and the related proteins.
#	Name	P-value	Adjusted p-value	Combined score	Genes
1	Epithelial Mesenchymal Transition	1.37e-62	6.848e-61	2182.71	ITGB1	ECM1	SPARC	SERPINE2	MCM7	ITGB3	SERPINE1	COL12A1	TNC	PLOD3	PLOD2	LAMC2	PLOD1	LAMC1	PVR	MYLK	LOXL2	COMP	CDH6	EFEMP2	LGALS1	CDH2	BASP1	ANPEP	TIMP3	QSOX1	ITGAV	CCN2	TIMP1	CCN1	TGM2	PDGFRB	POSTN	TPM4	IGFBP3	MMP2	ITGA2	IGFBP2	BGN	PCOLCE	ACTA2	TGFBR3	MMP14	VCAN	COL4A2
2	Coagulation	1.54e-38	3.851e-37	1146.19	ARF4	SPARC	SERPINA1	WDR1	CPQ	ITGB3	SERPINE1	PREP	CTSV	C8B	CLU	PRSS23	COMP	PLAU	LAMP2	CAPN2	CTSH	TIMP3	TIMP1	RAC1	CTSB	FGA	SERPINB2	VWF	MMP2	ITGA2	FGG	MST1	APOA1	MMP9	MMP14	RGN	SERPING1	MASP2	CFB	CFD	CPB2	LRP1	C1R	SERPINC1	PROZ	HTRA1	THBS1	C2	CPN1
3	Myc Targets V1	9.759e-38	1.626e-36	795.87	YWHAE	EIF4A1	HSP90AB1	MCM7	RPLP0	HNRNPU	RPL6	PSMD8	SYNCRIP	PSMD7	XPO1	YWHAQ	RUVBL2	PSMD3	RACK1	PSMD1	RPS10	ACP1	CCT3	CCT2	EIF1AX	RPS5	RPS6	CAD	ILF2	PSMA6	PSMA4	PSMA1	PSMA2	TCP1	ETF1	HPRT1	PABPC1	PPIA	KPNB1	PSMD14	GLO1	GSPT1	PSMA7	HSPD1	SRM	LDHA	PRDX4	PSMB2	PSMB3
4	mTORC1 Signaling	6.335e-34	7.919e-33	651.76	TFRC	GBE1	UBE2D3	SLC2A1	PLOD2	ENO1	PNP	NAMPT	ME1	PHGDH	CTSC	PSPH	PGM1	MAP2K3	ACTR3	ACTR2	G6PD	TPI1	HMGCS1	SORD	TUBA4A	SLC7A5	ACLY	PSMA3	PSMA4	ETF1	HPRT1	ALDOA	PPIA	GAPDH	RAB1A	PSMD12	PSMD14	PSMD13	USO1	GMPS	SLC1A5	CORO1A	HSP90B1	HSPD1	STIP1	LDHA	PSMB5	PRDX1	SERPINH1
5	Glycolysis	2.854e-30	2.854e-29	528.27	PYGB	B4GALT1	XYLT2	PLOD2	ENO1	PYGL	PLOD1	GMPPB	CASP6	GMPPA	ME1	PGM2	QSOX1	PGLS	SLC16A3	G6PD	TPI1	RARS1	PGAM1	IGFBP3	AKR1A1	TALDO1	MIF	VCAN	PKM	ALDOB	ALDOA	FKBP4	ALDH7A1	PPIA	MET	CD44	GNE	ALDH9A1	PRPS1	TXN	EGFR	LDHA	NT5E	UGP2	GPC1	PGK1	BPNT1	MDH1	GOT1
6	Complement	4.426e-21	3.688e-20	276.77	CPM	SERPINA1	CPQ	SERPINE1	PREP	CTSV	LIPA	CLU	LGALS3	CA2	LAMP2	ME1	CTSH	TIMP1	CTSD	CTSC	CTSB	SERPINB2	ANXA5	F7	MMP14	COL4A2	SERPING1	CDH13	LAP3	PFN1	CFB	USP14	USP15	LRP1	SERPINC1	C1R	NOTCH4	GNAI3	PLA2G7	C2	GNAI2	C3	DPP4	CD59	LTA4H	CD55	LYN	F10	HSPA5
7	Xenobiotic Metabolism	1.496e-19	1.069e-18	242.72	SERPINE1	REG1A	SERPINA6	CSAD	CNDP2	CA2	CASP6	MAN1A1	PTGDS	ACP1	HGFAC	CBR1	GSTO1	ARG1	PGD	UGDH	RBP4	MTHFD1	DDAH2	CAT	ANGPTL3	FETUB	HPRT1	GART	FBP1	CFB	CES1	EPHA2	ALDH9A1	ITIH4	ENPEP	AHCY	ADH1C	LCAT	FBLN1	SLC1A5	ADH5	VTN	TKFC	ASL	PDLIM5	NQO1	JUP	F10	GSS
8	Apical Junction	4.551e-18	2.845e-17	211.75	ITGB1	B4GALT1	ITGB4	CTNND1	LAMC2	ACTB	CDH6	SGCE	CDH1	AMH	HRAS	YWHAH	CAP1	VWF	ITGA3	ACTN1	ITGA2	MMP2	ACTN4	MMP9	VCAN	ADAM15	RASA1	CDH11	FSCN1	MYH9	PFN1	VCL	LAMA3	EGFR	GNAI2	THBS3	CNN2	CTNNA1	RSU1	FLNC	CD99	CD276	VASP	VCAM1	JUP	LAMB3	MSN	NFASC	BMP1
9	Hypoxia	2.411e-17	1.339e-16	197.36	SCARB1	GBE1	SERPINE1	SLC2A1	ENO1	ENO3	HK1	NDST1	CASP6	IDS	PGM2	CCN2	CCN1	PGM1	TGM2	TPI1	ANXA2	GAA	IGFBP3	BGN	PRKCA	MIF	MYH9	ALDOC	ALDOB	ALDOA	GAPDH	FBP1	CHST3	SDC4	EGFR	SELENBP1	LDHA	UGP2	GPC1	PGK1	PKLR	HSPA5	CAV1	CP	EXT1	PFKL	P4HA1	COL5A1	XPNPEP1
10	Protein Secretion	2.56e-13	1.28e-12	197.00	NAPA	CD63	ARF1	TSG101	COPB1	VPS4B	CLTC	USO1	ATP1A1	EGFR	CLN5	RPS6KA3	SNX2	AP1G1	LAMP2	ATP6V1H	MAPK1	DNM1L	CTSC	SEC31A	RAB2A	ADAM10	AP2B1	IGF2R	ARCN1	KRT18	RAB14	PPT1	RAB5A
[truncated: 51 more columns]
